# Supplementary material
Source: publisher figshare collection journal article supplement (https://gsapubs.figshare.com/articles/dataset/_/22661677)
Supplement: Supplementary file 1 [file 1]

## Sheet: DR1A_U-PbSamples
Sample	Pluton	Location/Phase	UTM Zone	NAD83 Easting	NAD83 Northing	Description
KR-05-110	Cac	mapped as "megacrystic (ms)-bt granite phase"1	9	523320	6915388	medium-grained K-feldspar-porphyritic biotite monzogranite
KR-03-CS	Circular Stock	central and biotite-rich phases (mixed samples 28-1 and 28-2)2	10	225037	6881369	coarse-grained K-feldspar-porphyritic biotite monzogranite + medium-grained K-feldspar-porphyritic biotite-rich (20%) monzogranite
KR-05-148	Rifle Range	n/a	9	543670	6874850	coarse-grained K-feldspar-porphyritic (sparse) biotite monzogranite
KR-05-175	Lened	mapped as "megacrystic (ms)-bt granite phase"1	9	518278	6916602	fine- to medium-grained K-feldspar-megacrystic (plagioclase sub-porphyritic) biotite monzogranite
KR-05-208	Little Hyland	n/a	9	534837	6860604	strongly folidated (K-feldspar-augen) fine- to medium-grained equigranular biotite monzogranite
KR-05-210	Nahanni Range Road	n/a	9	531135	6865040	medium-grained equigranular biotite monzogranite
KR-05-215	Mine Stock	Outcrop behind apartment building)2	9	540435	6870650	fine- to medium-grained K-feldspar-porphyritic (sparse) biotite monzogranite
KR-03-MS	Mine Stock	Road outcrop on the town site (sample 27-1)2	N.D.*	N.D.*	N.D.*	fine- to medium-grained K-feldspar-porphyritic (sparse) biotite monzogranite
KR-03-uMSa	Mine Stock	apical underground exposure at "5 Corners" (mixed samples 14-5 and 14-6)2	N.D.*	N.D.*	N.D.*	fine- to medium-grained biotite monzogranite
KR-03-uMSb	Mine Stock	apical underground exposure with local calcic metasomatism (bleaching) along contact with Ore Limestone at "3900-125" (mixed samples 31-4 and 31-5)2	N.D.*	N.D.*	N.D.*	fine-grained leucocratic biotite monzogranite
03M-207	Mine Stock	underground exposure at "main haulage drift"2	N.D.*	N.D.*	N.D.*	fine- to medium-grained biotite monzogranite
03M-220	Ragged	n/a	9	548180	6872717	fine- to medium-grained biotite monzogranite
MAC-177A	Mactung (North) / Cirque Lake	mapped as "porphyritic bt granite"3	9	442806	7018033	coarse-grained feldspar porphyritic biotite granite
MAC-165A	Mactung (North) / Cirque Lake	"felsic dyke zone" hosted in country rock3	9	442733	7017826	muscovite-tourmaline leucocratic granite dyke (3 meters wide)
MAC-197	Mactung (North) / Cirque Lake	mapped as "porphyritic bt granite"3	9	442139	7018339	feldspar porphyritic biotite granite
South Pluton MAC	Mactung (South) / Rocksldie Mountain	N.A.†	N.D.*	N.D.*	N.D.*	mixture of drill core samples
LEN-1	Lened	N.A.†	N.D.*	N.D.*	N.D.*	mixture of drill core samples
Mine Stock CAN	Mine Stock	N.A.†	N.D.*	N.D.*	N.D.*	mixture of drill core samples
*N.D. = no data.
†N.A. = not applicable.
1 Gordey, S.P., and Anderson, R.G, 1993, Evolution of the northern cordilleran miogeocline, Nahanni map area (105I), Yukon and Northwest Territories: Geological Survey of Canada Memoir 428, 214 p.
2 Rasmussen, K.L., Lentz, D.R., Falck, H., and Pattison, D.R., 2011, Felsic magmatic phases and the role of late-stage aplitic dykes in the formation of the world-class Cantung Tungsten skarn deposit, Northwest Territories, Canada: Ore Geology Reviews, v. 41, p. 75–111, doi:10.1016/j.oregeorev.2011.06.011.
3 Gebru, A.L., 2017, Petrogenesis of granitoids in the vicinity of the Mactung tungsten skarn deposit, NE Yukon-Northwest Territories: characterization of skarn nineralization and causative plutons through geological, petrochemical, mineralogical, and geochronological analysis [Ph.D. Thesis]: Fredericton, University of New Brunswick, 750 p.

## Sheet: DR1B_U-PbRMSummary+Conditions
	REFERENCE MATERIAL SUMMARY						ANALYSIS CONDITIONS
Analysis phase	Reference material	n	207Pb/206Pb age (Ma) - this study (weighted mean)	MSDW	207Pb/206Pb age (Ma) - actual	% diff.	Spot diameter (µm)	Energy fluence (J/cm2)	Laser repetition rate (Hz)	Background time (s)	Ablation time (s)	Washout time (s)
IIa	LH94-151	45/45	1827.3 ± 3.5 (2S)	0.073	1830 ± 2	0.15	10	3.4-3.7	8	34-37	40	48
IIa	915002	44/45	1065 ± 13 (95% CI)	1.4	1066.01 ± 0.61	0.09
IIa	FC-13	44/46	1098.9 ± 3.7 (2S)	1.4	1099.0 ± 0.6	0.01
IIb	LH94-151	71/71	1827.1 ± 3.1 (2S)	0.36	1830 ± 2	0.16	10	3.3-3.7	8	37-38	30	48
IIb	915002	70/72	1071.7 ± 9.5 (2S)	1.2	1066.01 ± 0.61	-0.53
IIb	FC-13	17/18	1096.7 ± 9.9 (95% CI)	1.7	1099.0 ± 0.6	0.21
IId	LH94-151	68/73	1828.0 ± 1.6 (2S)	0.89	1830 ± 2	0.10929	23	3.7-3.9	6	35-36	35	33
IId	915002	73/73	1042.7 ± 4.3 (2S)	1	1066.01 ± 0.61	2.18666
IId	FC-13	68/71	1095.7 ± 2.0 (2S)	1.3	1099.0 ± 0.6	0.330027
Note: All errors are reported as either internal 2-sigma (absolute; 2S) or at the 95% confidence interval (95% CI), and 91500 and FC-1 were treated as unknowns with standard-corrected results reported.
1 Ashton, K.E., Heaman, L.M., Lewry, J.F., Hartlaub, R.P., and Shi, R., 1999, Age and origin of the Jan Lake Complex: A glimpse at the buried Archean craton of the Trans-Hudson Orogen: Canadian Journal of Earth Sciences, v. 36, p. 185-208, doi:10.1139/e98-038.
2 Horstwood, M.S.A., et al, 2016, Community-derived standards for LA-ICP-MS U-(Th-)Pb geochronology – uncertainty propagation, age interpretation and data reporting: Geostandards and Geoanalytical Research, v. 40, p. 311-332, doi:10.1111/j.1751-908X.2016.00379.x.
3 Paces, J.B., and Miller, J.D.Jr., 1993, Precise U–Pb ages of Duluth Complex and related mafic intrusions, northeastern Minnesota: Geochronological insights to physical, petrogenetic, paleomagnetic, and tectonomagmatic processes associated with the 1.1 Ga midcontinent rift system: Journal of Geophysical Research, v. 98, p. 13997-14013, doi:10.1029/93JB01159.

## Sheet: DR1C_U-PbInheritanceData
Sample ID	Intrusive Body	Mount ID	Analysis Phase	DATE	Analysis ID	Duration (s)	Total points	Textural Description	Disc %*	Final 207_235	Final 207_235 Int2SE	Final 207_235 Prop2SE	Final 206_238	Final 206_238 Int2SE	Final 206_238 Prop2SE	Error Correlation 6_38 vs 7_35	Final 238_206	Final 238_206 Prop2SE	Final 207_206	Final 207_206 Int2SE	Final 207_206 Prop2SE	Error Correlation 38_6 vs 7_6	Final Age 207_235	Final Age 207_235 Int2SE	Final Age 207_235 Prop2SE	Final Age 206_238	Final Age 206_238 Int2SE	Final Age 206_238 Prop2SE	Final Age 207_206	Final Age 207_206 Int2SE	Final Age 207_206 Prop2SE	Calculated Concordia Age	2-sigma	MSDW (>2.5 filtered out)	Probability of Concordance	Re-calculated Upper Intercept Age: on Concordia (Ma)	2-sigma	% error (>10% filtered out)	Best Age (Ma)1	2-sigma
03M-220	Ragged pluton	KR-2	Phase IIa	APR19	220-H-13 - 1	18.408	43	first 2/3 of analysis has relatively stable 207/206 signal (1050 Ma) with nearly concordant 8/6 and 7/5	106.571	1.963	0.07	0.14	0.1897	0.0054	0.013	0.50577	5.27148	0.361251	0.0748	0.0024	0.0024	0.27087	1100	24	46	1119	29	70	1050	63	63	1105	47	0.29	0.59	1066	150	14.0713	1105	47
KR-05-148	Rifle Range pluton	KR-3	Phase IIa	APR19	148-D-2-b - 1	13.139	31	b = first 1/3 of analysis has relatively stable 207/206 signal (2604 Ma) with nearly concordant 8/6 and 7/5	106.336	12.78	0.34	0.83	0.537	0.015	0.037	0.84108	1.8622	0.128308	0.1751	0.0029	0.0029	0.32399	2661	26	63	2769	64	150	2604	27	27	2625	49	3.8	0.051	2580	64	2.48062	2580	64
KR-05-175	Lened pluton	KR-2	Phase IIa	APR19	175-A-30 - 1	13.261	31	first 1/2 of analysis has relatively stable 207/206 signal (1789 Ma) with nearly concordant 8/6 and 7/5	105.981	5.13	0.11	0.32	0.3421	0.0066	0.022	0.68835	2.92312	0.187982	0.1095	0.0018	0.0018	0.39815	1841	18	54	1896	32	110	1789	31	31	1832	52	2	0.16	1775	94	5.29577	1832	52
KR-03-CS	Circular Stock	KR-1	Phase IIa	APR19	CS-C-13 - 1	20.738	48	most of signal has relatively stable 207/206 (1784 Ma) and nearly concordant 6/8 and 7/5	105.605	5.16	0.12	0.33	0.3395	0.0066	0.022	0.52204	2.94551	0.190872	0.1095	0.0023	0.0023	0.29513	1843	20	54	1884	32	110	1784	38	38	1846	54	0.71	0.4	1800	120	6.66667	1846	54
03M-220	Ragged pluton	KR-2	Phase IIa	APR19	220-J-3 - 1	10.362	24	first 1/4 has relatively stable 206/207 signal (2358 Ma) with nearly concordant 8/6 and 7/5	104.792	9.75	0.33	0.66	0.467	0.012	0.031	0.75873	2.14133	0.142144	0.1514	0.0035	0.0035	0.18026	2409	31	63	2471	54	140	2358	39	39	2396	58	1.4	0.23	2360	81	3.4322	2396	58
SOUTHMAC	Rockslide Mountain pluton	KR-3	Phase IIa	APR19	SM-A-4-c - 1	10.518	25	c = first 1/4 has relatively stable 207/206 signal (1823 Ma) with nearly concordant 8/6 and 7/5	104.224	5.14	0.4	0.5	0.336	0.025	0.033	0.89598	2.97619	0.292304	0.112	0.0037	0.0037	0.083005	1851	66	83	1900	100	130	1823	63	63	1829	64	0.28	0.6	1813	84	4.6332	1829	64
KR-05-110	Cac pluton	KR-2	Phase IIa	APR19	110-B-26-b - 1	17.83	42	b = first 1/2 of analysis has relatively stable 207/206 signal (1055 Ma) with nearly concordant 8/6 and 7/5	103.223	1.889	0.034	0.12	0.1841	0.0033	0.012	0.48498	5.43183	0.354057	0.0747	0.0014	0.0014	0.56179	1077	12	41	1089	18	65	1055	37	37	1079	41	0.17	0.68	1050	140	13.3333	1079	41
KR-03-CS	Circular Stock	KR-1	PHASE IIb	MAY6	CS-D-13-b	13.721	32	b = first 1/2 of analysis has good stable and nearly concordant 207/206 signal (2621 Ma)	103.129	12.51	0.28	0.9	0.522	0.016	0.039	0.87418	1.91571	0.143128	0.1761	0.0026	0.0026	0.64717	2642	21	68	2703	68	160	2621	22	22	2616	51	1.3	0.25	2593	62	2.39105	2616	51
03M-220	Ragged pluton	KR-2	PHASE IIb	MAY6	220-J-19-b	13.773	33	b = entire analysis has relatively stable 207/206 signal but first 1/2 is concordant (1922 Ma)	102.029	5.83	0.16	0.43	0.3558	0.0092	0.026	0.74628	2.81057	0.205382	0.118	0.0023	0.0023	0.255	1949	24	64	1961	44	120	1922	35	35	1948	61	0.068	0.79	1938	96	4.95356	1948	61
MINESTOCKCAN	Mine Stock pluton	KR-4	Phase IIa	APR26	MS-E-6 - 1	23.696	56	entire analysis has stable 207/206 signal (2000 Ma) and concordant 6/8 and 7/5	101.9	6.47	0.3	0.58	0.373	0.013	0.031	0.88078	2.68097	0.222815	0.1229	0.0026	0.0026	-0.17864	2039	38	75	2038	61	140	2000	35	35	2041	64	0.0016	0.97	2040	77	3.77451	2041	64
03M-220	Ragged pluton	KR-4	PHASE IId	DEC4	220-C-23 - 1	29.028	67	entire analysis has good stable and nearly concordant 207/206 signal (2086 Ma)	101.63	6.95	0.11	0.22	0.3896	0.0053	0.013	0.78868	2.56673	0.0856457	0.1293	0.0013	0.0013	0.17097	2104	14	28	2120	25	60	2086	18	18	2100	25	0.57	0.45	2089	38	1.81905	2100	25
03M-207	UG Mine Stock	KR-1	PHASE IIb	MAY6	207-E-18	11.041	26	middle 1/3 of analysis has moderately to poorly stable 207/206 signal (1888 Ma) with essentially concordant 6/8 and 7/5	101.377	5.59	0.36	0.52	0.346	0.017	0.029	0.86301	2.89017	0.24224	0.1161	0.004	0.004	-0.059682	1906	57	84	1914	84	140	1888	66	66	1914	70	0.00051	0.98	1914	86	4.49321	1914	70
MAC-177a	Cirque Lake pluton	KR-3	PHASE IId	NOV30	177-D-26 - 1	28.979	66	entire analysis is old and has good stable and concordant 207/206 signal (1023 Ma)	100.821	1.763	0.036	0.072	0.1735	0.0017	0.0075	0.30337	5.76369	0.249151	0.0737	0.0014	0.0015	0.28509	1031	13	27	1031.4	9.5	42	1023	39	43	1032	25	0.00079	0.98	1033	110	10.6486	1032	25
KR-03-CS	Circular Stock	KR-1	Phase IIa	APR19	CS-C-1-b - 1	15.237	35	b = first 1/3 of analysis has excellent 207/206 (1930 Ma), 6/8 and 7/5 signals; nearly concordant	100.674	5.796	0.078	0.35	0.3518	0.0051	0.022	0.33651	2.84252	0.177759	0.1184	0.0014	0.0014	0.62775	1945	12	52	1943	24	110	1930	21	21	1946	52	0.0027	0.96	1949	130	6.67009	1946	52
LEN-1	Lened pluton	KR-4	PHASE IIb	MAY10	LEN-H-2	10.22	24	first 2/3 of analysis are old but first 1/3 has best combination of stable 207/206 signal (2668 Ma) and concordant 6/8 and 7/5	100.15	12.84	0.18	0.64	0.5137	0.0086	0.026	0.66436	1.94666	0.0985268	0.1818	0.0023	0.0023	0.53606	2668	13	47	2672	37	110	2668	21	21	2667	45	0.0103	0.92	2664	69	2.59009	2667	45
03M-220	Ragged pluton	KR-4	PHASE IId	DEC4	220-B-21 - 1	11.522	26	entire analysis has old 207/206 signal @ ~2500 Ma, but first 1/4 of analysis is concordant and good stable 207/206 signal (2541 Ma)	100.079	11.22	0.26	0.4	0.484	0.013	0.02	0.93654	2.06612	0.0853767	0.1685	0.0022	0.0022	0.13343	2540	23	35	2543	57	86	2541	22	22	2540	19	0.0447	0.91	2539	26	1.02403	2540	19
LEN-1	Lened pluton	KR-4	PHASE IIb	MAY10	LEN-E-2	13.662	32	entire analysis is old but first 1/2 has best combination of stable 207/206 signal (1806 Ma) and concordant 6/8 and 7/5	99.8344	4.95	0.16	0.28	0.324	0.01	0.019	0.76446	3.08642	0.180994	0.111	0.0024	0.0024	0.35328	1808	27	48	1809	50	90	1812	39	39	1811	45	0.0025	0.96	1813	74	4.08163	1811	45
KR-05-110	Cac pluton	KR-2	Phase IIa	APR19	110-B-25-b - 1	14.061	33	b = first 1/2 of analysis (except very beginning) has relatively stable 207/206 signal (2571 Ma) with concordant 8/6 and 7/5	99.5333	11.66	0.49	0.84	0.489	0.021	0.037	0.91017	2.04499	0.154733	0.1708	0.0027	0.0027	-0.0061191	2571	42	73	2559	93	160	2571	30	30	2583	44	0.047	0.83	2587	54	2.08736	2583	44
MINESTOCKCAN	Mine Stock pluton	KR-4	Phase IIa	APR21	MS-F-34-b - 1	17.709	42	b = first 1/2 of analysis has moderately stable 207/206 signal (1066 Ma) with concordant 6/8 and 7/5 (analysis very close to target)	99.4371	1.83	0.12	0.13	0.179	0.011	0.012	0.9471	5.58659	0.37452	0.0752	0.0017	0.0017	0.12044	1060	41	46	1060	59	65	1066	47	47	1051	38	0.16	0.69	1044	49	4.69349	1051	38
SOUTHMAC	Rockslide Mountain pluton	KR-4	Phase IIa	APR21	SM-B-6 - 1	19.387	45	entire analysis has poor to moderately stable 207/206 signal with strongly elevated to nearly concordant 6/8 and 7/5 but middle 1/2 is concordant (2002 Ma) (analysis missed target)	99.3506	6.14	0.21	0.28	0.362	0.014	0.018	0.76546	2.76243	0.137358	0.1229	0.003	0.003	0.41074	1991	30	39	1989	66	82	2002	47	47	1997	36	0.02	0.89	2001	60	2.9985	1997	36
KR-03-CS	Circular Stock	KR-1	PHASE IIb	MAY6	CS-C-11-b	16.444	38	b = first 1/2 of analysis has relatively stable and concordant 207/206 signal (2525 Ma) with strongly elevated to nearly concordant 6/8 and 7/5	99.1683	10.86	0.42	0.85	0.476	0.02	0.038	0.92451	2.10084	0.167714	0.1671	0.0027	0.0027	0.54155	2505	36	74	2504	89	170	2525	28	28	2512	45	0.00074	0.98	2512	53	2.10987	2512	45
03M-220	Ragged pluton	KR-2	PHASE IIb	MAY6	220-H-3-b	17.661	41	b = most of analysis has moderately stable concordant 207/206 signal (1836 Ma) with strongly elevated 6/8 and 7/5	99.1285	5.105	0.093	0.36	0.3264	0.0056	0.023	0.46469	3.06372	0.215888	0.1125	0.0021	0.0021	0.48238	1836	15	60	1820	27	110	1836	34	34	1836	60	0.104	0.75	1856	140	7.5431	1836	60
MAC-177a	Cirque Lake pluton	KR-3	Phase IIa	APR19	177-B-19 - 1	12.596	29	middle 1/4 of analysis has stable 207/206 signal (1797 Ma) and concordant 8/6 and 7/5	99.054	4.89	0.52	0.59	0.321	0.033	0.038	0.93681	3.11526	0.368785	0.1093	0.0032	0.0032	-0.13879	1760	110	120	1780	170	190	1797	60	60	1805	68	0.015	0.9	1808	80	4.42478	1805	68
03M-220	Ragged pluton	KR-4	Phase IIa	APR21	220-F-17-b - 1	10.943	25	b = entire analysis has old 207/206 signal but middle 1/4 has most stable 207/206 signal (2161 Ma) with concordant 6/8 and 7/5 (analysis missed target)	99.0282	7.3	0.46	0.51	0.394	0.023	0.026	0.90533	2.53807	0.167487	0.1352	0.0038	0.0038	0.19732	2139	57	63	2140	110	120	2161	49	49	2153	46	0.047	0.83	2156	53	2.45826	2153	46
MINESTOCKCAN	Mine Stock pluton	KR-4	Phase IIa	APR26	MS-F-13 - 1	18.853	45	first 1/2 of analysis has relatively stable 207/206 signal (1441 Ma) with concordant 6/8 and 7/5	98.8203	3.11	0.16	0.29	0.248	0.013	0.023	0.87609	4.03226	0.373959	0.0906	0.0021	0.0021	0.32849	1426	38	68	1424	67	120	1441	47	47	1439	62	0.045	0.83	1446	93	6.43154	1439	62
MINESTOCKCAN	Mine Stock pluton	KR-4	Phase IIa	APR26	MS-H-13 - 1	24.016	57	first 2/3 of analysis has relatively stable 207/206 signal (1939 Ma) and concordant 6/8 and 7/5	98.7107	5.68	0.2	0.48	0.344	0.013	0.029	0.72792	2.90698	0.245065	0.1196	0.0032	0.0032	0.52313	1922	29	71	1914	66	150	1939	49	49	1933	70	0.2	0.65	1954	110	5.62948	1933	70
03M-207	UG Mine Stock	KR-1	Phase IIa	APR19	207-B-6 - 1	13.644	32	first 1/3 of analysis has stable 207/206 signal (2690 Ma) and strongly elevated 6/8 and 7/5 (nearly concordant); middle of analysis appears to be ~2450 Ma	98.4387	12.97	0.51	0.92	0.509	0.02	0.037	0.97605	1.96464	0.142813	0.1843	0.0016	0.0016	-0.10921	2672	40	71	2648	86	160	2690	15	15	2694	25	0.29	0.59	2697	27	1.00111	2694	25
MAC-177a	Cirque Lake pluton	KR-3	Phase IIa	APR19	177-D-23-b - 1	21.668	51	b = first 2/3 of analysis have relatively to moderately stable 207/206 signal (1911 Ma) with strongly elevated to nearly concordant 8/6 and 7/5	97.9592	5.47	0.27	0.42	0.338	0.015	0.026	0.91697	2.95858	0.227583	0.1174	0.0023	0.0023	-0.1656	1885	43	67	1872	72	120	1911	35	35	1908	47	0.29	0.59	1918	58	3.02398	1908	47
MAC-197	Cirque Lake pluton	KR-3	Phase IIa	APR19	197A-B-19 - 1	14.731	34	b = first 1/3 of analysis has relatively stable 207/206 signal (1992 Ma) with nearly concordant 8/6 and 7/5	97.8916	5.94	0.6	0.7	0.357	0.035	0.042	0.98178	2.80112	0.329544	0.1226	0.0019	0.0019	-0.25435	1950	100	120	1950	180	210	1992	28	28	1966	39	0.00027	0.99	1966	42	2.13632	1966	39
03M-207	UG Mine Stock	KR-1	PHASE IIb	MAY6	207-F-6	11.849	28	b = middle 1/3 of analysis has moderately stable and concordant 207/206 signal (1561 Ma) with strongly elevated to concordant 6/8 and 7/5	97.886	3.62	0.25	0.35	0.268	0.017	0.025	0.89531	3.73134	0.348073	0.0972	0.0032	0.0032	0.036412	1544	59	83	1528	88	130	1561	62	62	1568	63	0.48	0.49	1588	85	5.35264	1568	63
KR-03-CS	Circular Stock	KR-1	Phase IIa	APR19	CS-A-12-b - 1	12.925	30	b = first 1/3 of analysis has stable 207/206 (2620 Ma) and strongly elevated 6/8 and 7/5	97.6336	11.89	0.26	0.75	0.487	0.013	0.033	0.894	2.05339	0.139141	0.1766	0.0021	0.0021	0.54475	2594	21	59	2558	57	140	2620	20	20	2613	40	0.66	0.42	2627	52	1.97944	2613	40
MAC-197-A	Cirque Lake pluton	KR-3	PHASE IId	NOV30	197A-A-22-b - 1	29.777	69	b = entire analysis has very good stable 207/206 signal (1018 Ma) with nearly concordant 6/8 and 7/5	96.5029	1.661	0.016	0.061	0.1646	0.001	0.007	0.39113	6.07533	0.258368	0.07324	0.00068	0.00091	0.2631	993.6	6	23	982.4	5.5	39	1018	19	25	992	23	0.39	0.53	1022	97	9.49119	992	23
03M-220	Ragged pluton	KR-4	PHASE IId	DEC4	220-E-19 - 1	18.179	42	entire analysis is moderately stable @ 1910 Ma with strongly elevated to nearly cocordant 6/8 and 7/5, but first 1/2 of analysis is nearly concordant (1910 Ma)	96.0733	5.315	0.057	0.16	0.3292	0.0032	0.01	0.34542	3.03767	0.0922742	0.1171	0.0013	0.0013	0.43566	1870.8	9.3	25	1835	15	51	1910	20	20	1867	25	2.5	0.11	1915	64	3.34204	1867	25
KR-03-uMSb	underground Mine Stock	KR-4	Phase IIa	APR26	uMSb-A-14 - 1	14.271	33	entire analysis has very stable 207/206 signal with strongly elevated to concordant 6/8 and 7/5 but middle 1/3 is most concordant (2625 Ma)	95.7714	11.45	0.35	0.95	0.478	0.015	0.039	0.88662	2.09205	0.17069	0.1773	0.0028	0.0028	0.30028	2557	29	77	2514	65	170	2625	26	26	2581	56	0.61	0.43	2595	66	2.54335	2581	56
KR-03-CS	Circular Stock	KR-1	PHASE IIb	MAY6	CS-B-2-a	14.929	35	a = first 1/2 of analysis has relatively stable 207/206 signal (1821 Ma) and nearly concordant 6/8 and 7/5	95.4421	4.78	0.16	0.37	0.3099	0.0097	0.023	0.86602	3.22685	0.239488	0.1116	0.0023	0.0023	0.12022	1779	30	67	1738	48	120	1821	37	37	1802	55	1.6	0.21	1833	73	3.98254	1802	55
KR-05-148	Rifle Range pluton	KR-3	PHASE IId	NOV30	148--D-2-a - 1	28.906	66	a = entire analysis has moderately good stable 207/206 signal (2699 Ma) with nearly concordant 6/8 and 7/6	95.4057	12.56	0.14	0.46	0.4912	0.0042	0.021	0.29757	2.03583	0.0870367	0.1854	0.0022	0.0027	0.5054	2646	10	35	2575	18	92	2699	20	24	2645	35	2.7	0.1	2705	79	2.92052	2705	79
KR-05-148	Rifle Range pluton	KR-2	Phase IIa	APR19	148-A-7 - 1	13.817	33	first 1/3 of analysis has relatively stable 207/206 signal (2524 Ma) with nearly concordant 8/6 and 7/5	95.1268	10.39	0.19	0.64	0.4515	0.0081	0.029	0.74883	2.21484	0.14226	0.1668	0.0021	0.0021	0.39595	2469	17	58	2401	36	130	2524	21	21	2487	51	2.1	0.14	2530	76	3.00395	2487	51
03M-220	Ragged pluton	KR-4	PHASE IId	DEC4	220-D-25 - 1	30.199	69	entire analysis has good stable and nearly concordant 207/206 signal (1861 Ma)	95.0027	4.949	0.051	0.14	0.3156	0.0027	0.0099	0.5191	3.16857	0.0993942	0.114	0.0012	0.0012	0.35044	1810.1	8.6	24	1768	13	49	1861	19	19	1811	24	4.2	0.041	1863	55	2.95223	1863	55
03M-207	underground Mine Stock	KR-1	PHASE IId	NOV28	207-D-10 - 1	14.034	33	first 1/2 of analysis has good stable 207/206 signal (1970 Ma) with very strongly elevated to nearly concordant 6/8 and 7/5	94.4162	5.65	0.13	0.25	0.3347	0.0082	0.016	0.88313	2.98775	0.142826	0.1211	0.0014	0.0014	0.31982	1922	20	39	1860	40	76	1970	21	21	1956	29	7.1	0.008	1996	42	2.10421	1996	42
MAC-177a	Cirque Lake pluton	KR-3	PHASE IId	NOV30	177-B-13 - 1	19.196	44	entire analysis is old and nearly concordant, but first 1/2 has most stable 207/206 signal (1456 Ma) and 6/8 and 7/5	94.3681	3.01	0.038	0.11	0.2376	0.0028	0.01	0.69873	4.20875	0.177136	0.09154	0.00086	0.0011	0.18071	1409.7	9.6	29	1374	14	54	1456	18	24	1416	27	3.5	0.06	1470	62	4.21769	1470	62
LEN-1	Lened pluton	KR-4	PHASE IIb	MAY10	LEN-G-8	21.662	51	entire analysis has good stable 207/206 signal (2698 Ma) and nearly concordant 6/8 and 7/5	94.3662	12.39	0.25	0.64	0.4846	0.0093	0.025	0.87496	2.06356	0.106457	0.1853	0.0024	0.0024	0.16278	2632	19	49	2546	40	110	2698	21	21	2674	35	6.2	0.013	2705	43	1.58965	2705	43
03M-220	Ragged pluton	KR-4	PHASE IId	DEC4	220-B-24 - 1	10.026	23	nearly entire analysis has old 207/206 signal between 2700-2900 Ma, but first 1/4 has moderately stable and nearly concordant 207/206 signal (2964 Ma)	94.2982	16.43	0.62	0.76	0.543	0.018	0.024	0.9397	1.84162	0.0813976	0.2184	0.0062	0.0062	-0.46819	2899	36	45	2795	73	100	2964	46	46	n/a	n/a	n/a	n/a	2980	26	0.872483	2980	26
SOUTH MAC	Rockslide Mountain pluton	KR-3	PHASE IId	NOV30	SM-K-1 - 1	28.707	66	entire analysis has very good stable and near concordant 207/206 signal (1980 Ma)	94.0404	5.639	0.061	0.21	0.3349	0.0029	0.014	0.64436	2.98597	0.124824	0.12176	0.00097	0.0014	0.40981	1921.3	9.4	32	1862	14	70	1980	14	20	1930	31	5.2	0.023	1992	62	3.11245	1992	62
03M-220	Ragged pluton	KR-4	PHASE IId	DEC4	220-B-26 - 1	10.64	25	nearly entire analysis has old 207/206 signal @ ~1800 Ma, but first 1/4 has moderately stable and nearly concordant 207/206 signal (1860 Ma)	93.6559	4.87	0.16	0.2	0.3105	0.0085	0.013	0.84213	3.22061	0.13484	0.1139	0.002	0.002	0.016259	1794	28	36	1742	42	63	1860	31	31	1820	30	7.5	0.006	1865	44	2.35925	1865	44
MINESTOCKCAN	Mine Stock pluton	KR-4	Phase IIa	APR 21	MS-D-10 - 1	11.467	27	first 1/3 of analysis has stable 207/206 signal (2633 Ma)with strongly elevated to nearly concordant 6/8 and 7/5 (analysis missed target)	92.9738	11.42	0.39	0.51	0.463	0.019	0.023	0.9088	2.15983	0.107292	0.1782	0.0031	0.0031	0.49832	2555	31	41	2448	83	100	2633	29	29	2608	26	10.3	0.001	2647	35	1.32225	2647	35
MINE STOCK CAN	Mine Stock pluton	KR-4	PHASE IId	DEC4	MS-H-24 - 1	15.232	35	entire analysis is old @ 1825 Ma, but first 1/2 is nearly concordant (1828 Ma)	92.8337	4.64	0.14	0.19	0.3014	0.0095	0.013	0.89902	3.31785	0.143106	0.1119	0.0015	0.0015	0.26171	1754	25	33	1697	47	65	1828	24	24	1791	25	10	0.002	1831	36	1.96614	1831	36
03M-220	Ragged pluton	KR-4	PHASE IIb	MAY10	220-D-20	15.777	37	first 1/2 of analysis has moderately-poorly stable 207/206 signal (1891 Ma) with nearly concordant to concordant 6/8 and 7/5	92.385	4.9	0.23	0.33	0.312	0.013	0.019	0.79249	3.20513	0.195184	0.116	0.0026	0.0026	0.23667	1819	38	55	1747	62	96	1891	40	40	1817	54	3	0.081	1867	77	4.12426	1867	77
03M-207	UG Mine Stock	KR-1	Phase IIa	APR19	207-E-20-b - 1	12.097	28	b = 1/4 of analysis has moderately stable 207/206 signal (1807 Ma) in the first half with strongly elevated to nearly concordant 6/8 and 7/5	92.363	4.54	0.3	0.4	0.296	0.018	0.026	0.90974	3.37838	0.296749	0.1108	0.003	0.003	-0.057687	1728	59	79	1669	93	130	1807	47	47	1783	53	3.7	0.055	1826	70	3.83352	1826	70
KR-03-uMSa	underground Mine Stock	KR-4	Phase IIa	APR26	uMSa-A-2-b - 1	11.112	26	b = first 1/4 of analysis has moderately stable 207/206 signal (1890 Ma) with nearly concordant 6/8 and 7/5 (middle 1/3 of analysis has moderately stable 207/206 signal at ~2250 Ma)	92.1164	4.87	0.16	0.41	0.31	0.01	0.025	0.47593	3.22581	0.260146	0.1162	0.0038	0.0038	0.50692	1795	28	70	1741	49	120	1890	60	60	1793	71	1.08	0.3	1868	160	8.56531	1793	71
LEN-1	Lened pluton	KR-4	PHASE IIb	MAY10	LEN-D-17	14.493	34	first 1/2 of analysis has poor but relatively stable 207/206 signal (1894 Ma) with nearly concordant 6/8 and 7/5	92.0803	5.05	0.2	0.31	0.3109	0.0071	0.016	0.60694	3.21647	0.165531	0.1165	0.0037	0.0037	0.0013982	1822	33	52	1744	35	81	1894	56	56	1822	52	7	0.008	1930	93	4.81865	1930	93
MINESTOCKCAN	Mine Stock pluton	KR-4	Phase IIa	APR26	MS-E-15 - 1	13.868	32	first 1/3 of analysis has relatively stable 207/206 signal (1893 Ma) with strongly nearly concordant 6/8 and 7/5	92.0232	4.96	0.13	0.4	0.3104	0.009	0.025	0.87911	3.22165	0.259476	0.1161	0.0021	0.0021	0.21445	1811	22	67	1742	44	120	1893	32	32	1850	54	3.9	0.049	1899	74	3.89679	1899	74
SOUTHMAC	Rockslide Mountain pluton	KR-3	Phase IIa	APR19	SM-J-22 - 1	20.18	47	first 1/2 of signal (except very beginning) has relatively stable 207/206 signal (1859 Ma) with strongly elevated 8/6 and 7/5	91.8774	4.68	0.15	0.32	0.304	0.012	0.022	0.81649	3.28947	0.238054	0.1142	0.0027	0.0027	0.32594	1768	30	62	1708	57	110	1859	43	43	1783	50	2.3	0.13	1831	71	3.87766	1783	50
MINE STOCK CAN	Mine Stock pluton	KR-4	PHASE IId	DEC4	MS-F-22 - 1	31.362	72	entire analysis has good stable and nearly concordant 207/206 signal (1824 Ma)	91.7763	4.563	0.063	0.14	0.2966	0.0032	0.0095	0.63739	3.37154	0.107989	0.1117	0.0012	0.0012	0.20343	1741	12	26	1674	16	47	1824	20	20	n/a	n/a	n/a	n/a	1831	50	2.73075	1831	50
MAC-177a	Cirque Lake pluton	KR-3	Phase IIb	MAY9	177-A-15	14.178	34	first 1/2 of analysis has good 207/206 signal (2647) with strongly elevated 6/8 and 7/5	91.5376	11.44	0.26	0.34	0.457	0.011	0.017	0.7943	2.18818	0.0813985	0.1798	0.0034	0.0034	0.28626	2558	21	27	2423	47	75	2647	31	31	n/a	n/a	n/a	n/a	2672	38	1.42216	2672	38
MINE STOCK CAN	Mine Stock pluton	KR-4	PHASE IId	DEC4	MS-B-27 - 1	20.72	48	entire analysis has very good stable 207/206 signal @ 2668 Ma with strongly elevated 6/8 and 7/5, but middle 2/3 is nearest to concordant (2681 Ma)	91.533	11.72	0.2	0.37	0.4634	0.0066	0.015	0.83654	2.15796	0.0698521	0.1833	0.0017	0.0017	-0.024323	2581	16	30	2454	29	68	2681	15	15	n/a	n/a	n/a	n/a	2689	31	1.15284	2689	31
03M-207	underground Mine Stock	KR-1	PHASE IId	NOV28	207-C-15-a - 1	28.897	66	a = good stable 207/206 signal (1827 Ma) with nearly concordant 6/8 and 7/5	91.4614	4.598	0.061	0.19	0.296	0.0031	0.012	0.78764	3.37838	0.136961	0.1116	0.0011	0.0011	0.087179	1748	11	34	1671	15	61	1827	16	16	n/a	n/a	n/a	n/a	1849	50	2.70416	1849	50
MINE STOCK CAN	Mine Stock pluton	KR-4	PHASE IId	DEC4	MS-D-25 - 1	14.139	32	entire analysis has good stable signal @ 2740 Ma with strongly to moderately elevated 6/8 and 7/5, but first 1/3 of analysis is closest to concordant (2756 Ma)	91.4369	12.65	0.48	0.59	0.479	0.018	0.023	0.95821	2.08768	0.100244	0.1918	0.0022	0.0022	-0.032997	2649	38	46	2520	77	100	2756	19	19	n/a	n/a	n/a	n/a	2760	23	0.833333	2760	23
03M-220	Ragged pluton	KR-4	PHASE IIb	MAY10	220-D-29	9.9823	23	first 1/3 of analysis has moderately-poorly stable 207/206 signal (1953 Ma) with strongly elevated to concordant 6/8 and 7/5	91.3978	5.27	0.2	0.32	0.314	0.016	0.022	0.86855	3.18471	0.223133	0.1201	0.0031	0.0031	0.28978	1862	33	53	1785	64	86	1953	45	45	1913	39	9.4	0.002	1989	65	3.26797	1989	65
KR-03-MS	UG Mine Stock	KR-1	PHASE IIb	MAY6	MS-B-22-c	11.327	27	c = first 1/3 of analysis has relatively stable 207/206 signal (2058 Ma) with strongly elevated to nearly concordant 6/8 and 7/5	91.3508	5.97	0.53	0.67	0.34	0.027	0.036	0.95289	2.94118	0.311419	0.1276	0.004	0.004	-0.12373	1950	84	110	1880	140	180	2058	55	55	2046	54	3.9	0.049	2067	61	2.95114	2067	61
KR-03-MS	UG Mine Stock	KR-1	Phase IIa	APR19	MS-E-10-b - 1	8.4547	20	b = first 1/8 of analysis has relatively stable 207/206 signal (2729 Ma) with nearly concordant 6/8 and 7/5	91.2422	12.26	0.72	1	0.473	0.025	0.039	0.97489	2.11416	0.174318	0.1887	0.003	0.003	-0.393	2617	60	85	2490	110	170	2729	26	26	2713	27	6.8	0.009	2729	31	1.13595	2729	31
03M-220	Ragged pluton	KR-4	Phase IIa	APR26	220-E-3-b - 1	14.941	35	b = first 1/3 of analysis has stable 207/206 signal (2017 Ma) with strongly elevated to near concordant 6/8 and 7/5	91.175	5.63	0.22	0.49	0.331	0.011	0.027	0.93849	3.02115	0.246438	0.1244	0.0016	0.0016	-0.044393	1917	32	71	1839	53	130	2017	23	23	1984	47	5.5	0.019	2011	54	2.68523	2011	54
03M-220	Ragged pluton	KR-2	PHASE IIb	MAY6	220-E-20-b	12.4	29	b = entire analysis has moderately stable 207/206 signal but last 1/2 is nearly concordant (2710 Ma) with strongly elevated 6/8 and 7/5	91.1439	11.99	0.88	1.2	0.471	0.04	0.051	0.88962	2.12314	0.229894	0.1873	0.0062	0.0062	0.42076	2606	77	110	2470	170	220	2710	56	56	2656	62	2.5	0.11	2699	84	3.11226	2656	62
SOUTH MAC	Rockslide Mountain pluton	KR-3	PHASE IId	NOV30	SM-D-17 - 1	29.777	69	entire analysis has very good stable 207/206 signal (2650 Ma) with strongly elevated and stable 6/8 and 7/5	90.7925	11.18	0.17	0.43	0.4524	0.0047	0.02	0.88712	2.21043	0.0977203	0.1798	0.0013	0.0019	-0.085412	2536	14	36	2406	21	88	2650	12	18	n/a	n/a	n/a	n/a	2651	35	1.32026	2651	35
KR-03-CS	Circular Stock	KR-1	PHASE IId	NOV29	CS-F-16-a - 1	15.658	36	a = very good stable 6/8 signal throughout analysis @ 2534 Ma but closest to concordant section is last 1/2 (2539 Ma)	90.7838	10.06	0.12	0.49	0.43	0.0067	0.022	0.88663	2.32558	0.118983	0.1682	0.0012	0.0024	0.28252	2440	11	45	2305	30	100	2539	12	24	n/a	n/a	n/a	n/a	2650	41	1.54717	2650	41
03M-220	Ragged pluton	KR-2	Phase IIa	APR19	220-H-7 - 1	17.03	40	first 1/2 of analysis has relatively stable 207/206 signal (2591 Ma) with strongly elevated to nearly concordant 8/6 and 7/5	90.7758	10.63	0.38	0.73	0.441	0.014	0.031	0.92384	2.26757	0.159399	0.1737	0.0024	0.0024	-0.16077	2486	35	68	2352	61	140	2591	23	23	2570	37	10.7	0.001	2610	46	1.76245	2610	46
KR-03-MS	UG Mine Stock	KR-1	Phase IIa	APR19	MS-A-15-b - 1	16.8	40	b = middle 1/2 of analysis has relatively stable 207/206 signal (2636 Ma) with nearly concordant 6/8 and 7/5	90.7021	11.31	0.64	0.93	0.451	0.023	0.036	0.934	2.2173	0.17699	0.1786	0.0034	0.0034	-0.16525	2535	54	79	2390	100	160	2635	31	31	2644	870	10.4	0.001	2676	49	1.83109	2676	49
SOUTH MAC	Rockslide Mountain pluton	KR-3	PHASE IId	NOV30	SM-C-3 - 1	31.156	71	entire analysis has very good stable 207/206 signal (2503.6 Ma) with strongly elevated and stable 6/8 and 7/5	90.3898	9.54	0.12	0.36	0.4206	0.0045	0.018	0.8914	2.37756	0.10175	0.16474	0.00086	0.0016	0.052671	2391	12	35	2263	20	84	2503.6	8.8	16	n/a	n/a	n/a	n/a	2508	34	1.35566	2508	34
KR-03-uMSb	underground Mine Stock	KR-4	PHASE IId	DEC4	uMSb-A-4 - 1	17.765	41	entire analysis is old but first 1/2 has very good stable 207/206 signal (2160 Ma) with strongly elevated and stable 6/8 and 7/5	88.8426	6.455	0.062	0.19	0.3467	0.0035	0.011	0.61767	2.88434	0.0915135	0.1348	0.0012	0.0012	0.33249	2039.5	8.4	25	1919	17	53	2160	16	16	n/a	n/a	n/a	n/a	2172	48	2.20994	2172	48
SOUTH MAC	Rockslide Mountain pluton	KR-4	PHASE IIb	MAY10	SM-A-17	14.802	35	first 1/2 of analysis has moderately-poorly stable 207/206 signal (2205 Ma) with strongly elevated to nearly concordant 6/8 and 7/5	88.7982	6.75	0.26	0.41	0.356	0.013	0.022	0.79207	2.80899	0.173589	0.1387	0.0036	0.0036	0.28712	2074	34	54	1958	64	100	2205	44	44	n/a	n/a	n/a	n/a	2203	70	3.17749	2203	70
KR-03-MS	surface Mine Stock	KR-1	PHASE IId	NOV29	MS-B-11-a - 1	10.548	24	a = a small segment at the beginning of the analysis is ~2800 Ma but is quite discordant and has elevated 204, however the third 1/4 has moderately good 207/206 signal (2586 Ma) with strongly elevated 6/8 and 7/6	88.7471	10.31	0.18	0.52	0.4278	0.005	0.022	0.73036	2.33754	0.12021	0.1731	0.0021	0.003	0.24114	2462	16	45	2295	23	98	2586	21	29	n/a	n/a	n/a	n/a	2611	63	2.41287	2611	63
03M-220	Ragged pluton	KR-4	PHASE IId	DEC4	220-E-6 - 1	10.375	24	first 1/3 of analysis has very good stable and nearly concordant 207/206 signal (1917 Ma) with strongly elevated 6/8 and 7/5	88.6281	4.875	0.051	0.14	0.3016	0.0033	0.0097	0.49042	3.31565	0.106637	0.1175	0.0013	0.0013	0.4402	1797.7	8.8	25	1699	16	48	1917	20	20	n/a	n/a	n/a	n/a	1922	57	2.96566	1922	57
SOUTH MAC	Rockslide Mountain pluton	KR-3	PHASE IId	NOV30	SM-H-4-a - 1	30.821	70	a = entire analysis has very good stable 207/206 signal (1909 Ma) with strongly elevated stable 6/8 and 7/5	87.2184	4.77	0.11	0.2	0.295	0.0053	0.014	0.91402	3.38983	0.160873	0.1171	0.0012	0.0015	-0.24529	1780	19	35	1665	27	68	1909	19	24	n/a	n/a	n/a	n/a	1925	37	1.92208	1925	37
03M-220	Ragged pluton	KR-4	Phase IIa	APR21	220-C-2-b - 1	16.741	39	b = most of analysis has stable 207/206 signal (3068 Ma) with strongly elevated 6/8 and 7/5 (analysis missed target)	86.6645	16.2	0.46	0.67	0.511	0.014	0.021	0.9195	1.95695	0.0804225	0.2326	0.0035	0.0035	0.31261	2886	27	39	2658	61	88	3067	24	24	n/a	n/a	n/a	n/a	3058	27	0.88293	3058	27
SOUTHMAC	Rockslide Mountain pluton	KR-3	Phase IIb	MAY9	SM-E-16-b	10.128	24	b = first 1/3 of analysis has good stable 207/206 signal (2683 Ma) with strongly elevated 6/8 and 7/5	86.4704	10.97	0.75	0.77	0.435	0.028	0.031	0.97425	2.29885	0.163826	0.1835	0.0031	0.0031	-0.011731	2506	77	80	2320	130	150	2683	28	28	n/a	n/a	n/a	n/a	2687	27	1.00484	2687	27
KR-03-uMSa	underground Mine Stock	KR-4	Phase IIa	APR26	uMSa-B40-b - 1	10.043	23	b = first 1/4 of analysis has stable 207/206 signal (1920 Ma) with strongly elevated to concordant 6/8 and 7/5	86.4583	4.75	0.37	0.52	0.294	0.023	0.032	0.9463	3.40136	0.370216	0.1178	0.0022	0.0022	0.045491	1788	59	83	1660	120	160	1920	34	34	n/a	n/a	n/a	n/a	1923	67	3.48414	1923	67
KR-05-210	Nahanni Range Road pluton	KR-2	PHASE IIb	MAY6	210-C-14-b	10.673	25	b = first 1/3 of analysis has relatively stable 207/206 signal (1819 Ma) with strongly elevated 6/8 and 7/5	86.3112	4.28	0.35	0.46	0.277	0.022	0.029	0.9801	3.61011	0.377954	0.1114	0.0021	0.0021	-0.16391	1674	76	98	1570	110	150	1819	35	35	n/a	n/a	n/a	n/a	1844	40	2.1692	1844	40
MINESTOCKCAN	Mine Stock pluton	KR-4	Phase IIa	APR26	MS-B-33-b - 1	17.753	41	b = first 1/2 of analysis has stable 207/206 signal (2756 Ma) with strongly elevated to nearly concordant 6/8 and 7/5	85.9942	11.5	0.56	1	0.445	0.022	0.04	0.97388	2.24719	0.201995	0.1919	0.0023	0.0023	0.20374	2553	47	88	2370	100	180	2756	20	20	n/a	n/a	n/a	n/a	2727	35	1.28346	2727	35
MINESTOCKCAN	Mine Stock pluton	KR-4	Phase IIa	APR26	MS-G-26-b - 1	10.059	23	b = first 1/4 of analysis has stable 207/206 signal (2010 Ma) with concordant to strongly elevated 6/8 and 7/5	85.5721	5.23	0.6	0.72	0.308	0.034	0.041	0.98923	3.24675	0.432198	0.1239	0.0024	0.0024	-0.18862	1820	120	140	1720	170	210	2010	35	35	n/a	n/a	n/a	n/a	2012	36	1.78926	2012	36
MINE STOCK CAN	underground Mine Stock	KR-4	PHASE IIb	MAY10	MS-E-27	18.608	44	first 2/3 of analysis has good stable 207/206 signal (2148 Ma) with strongly elevated and stable 6/8 and 7/5	85.5214	6.17	0.13	0.32	0.3299	0.0073	0.017	0.8792	3.03122	0.156201	0.134	0.0016	0.0016	0.37161	1999	18	45	1837	35	83	2148	21	21	n/a	n/a	n/a	n/a	2183	45	2.06138	2183	45
MINE STOCK CAN	Mine Stock pluton	KR-4	PHASE IId	DEC4	MS-F-17 - 1	7.054	16	first 1/5 of analysis has good stable 207/206 signal (1651 Ma) with strongly elevated 6/8 and 7/5, and last 1/2 of analysis has moderately stable signal @ 1600 Ma with moderately to strongly elevated 6/8 and 7/5	85.4634	3.41	0.15	0.18	0.2447	0.0089	0.012	0.94913	4.08664	0.200407	0.1016	0.0016	0.0016	-0.47967	1505	37	43	1411	47	61	1651	29	29	n/a	n/a	n/a	n/a	1655	32	1.93353	1655	32
03M-220	Ragged pluton	KR-4	PHASE IId	DEC4	220-B-13-a - 1	10.301	23	a = last 1/2 of analysis has good moderately stable 207/206 signal @ ~1830 Ma, but third 1/4 has the most concordant and stable signal (1838 Ma) with strongly elevated 6/8 and 7/5	85.0925	4.27	0.13	0.17	0.2747	0.0069	0.011	0.9477	3.64033	0.145772	0.1125	0.0013	0.0013	-0.27391	1687	25	34	1564	35	55	1838	21	21	n/a	n/a	n/a	n/a	1856	24	1.2931	1856	24
MAC-197	Cirque Lake pluton	KR-3	Phase IIb	MAY9	197B-A-9-a	23.664	56	a = entire analysis has good 207/206 signal (2318 Ma) with strongly elevated 6/8 and 7/5	84.2537	7.16	0.32	0.34	0.355	0.016	0.019	0.93812	2.8169	0.150764	0.148	0.0025	0.0025	0.040566	2121	40	43	1953	78	92	2318	29	29	n/a	n/a	n/a	n/a	2313	34	1.46995	2313	34
MINE STOCK CAN	underground Mine Stock	KR-4	PHASE IIb	MAY10	MS-C-13-b	14.069	33	b = after first few seconds, first 1/2 of analysis has relatively stable 207/206 signal (2486 Ma) with strongly elevated to nearly concordant 6/8 and 7/5	83.9501	8.63	0.43	0.59	0.383	0.019	0.026	0.89946	2.61097	0.177246	0.1634	0.0036	0.0036	0.13246	2292	46	64	2087	87	120	2486	37	37	n/a	n/a	n/a	n/a	2502	52	2.07834	2502	52
LEN-1	Lened pluton	KR-4	PHASE IIb	MAY10	LEN-E-8	25.789	61	entire analysis has good 207/206 signal (1855 Ma) with strongly elevated and stable 6/8 and 7/5	83.7197	4.306	0.08	0.22	0.2725	0.0048	0.014	0.73035	3.66973	0.188536	0.1137	0.0016	0.0016	0.25495	1693	15	42	1553	24	70	1855	25	25	n/a	n/a	n/a	n/a	1887	70	3.70959	1887	70
03M-220	Ragged pluton	KR-2	PHASE IIb	MAY6	220-H-2-b	20.23	48	b = most of analysis has moderately stable 207/206 signal (1765 Ma) with strongly elevated to concordant but irregular 6/8 and 7/5	83.4561	3.89	0.25	0.37	0.258	0.015	0.023	0.95066	3.87597	0.345532	0.1083	0.002	0.002	-0.10117	1597	52	76	1473	79	120	1765	35	35	n/a	n/a	n/a	n/a	1802	55	3.05216	1802	55
MINESTOCKCAN	Mine Stock pluton	KR-4	Phase IIa	APR21	MS-G-25 - 1	10.43	25	first 1/4 of analysis has stable 207/206 signal (1826 Ma) with strongly elevated 7/5 and 6/8 (analysis missed target)	82.9682	4.079	0.074	0.14	0.2649	0.0054	0.0094	0.82212	3.77501	0.133957	0.1117	0.0015	0.0015	0.3574	1649	15	28	1515	28	48	1826	24	24	n/a	n/a	n/a	n/a	1840	39	2.11957	1840	39
MINE STOCK CAN	Mine Stock pluton	KR-4	PHASE IId	DEC4	MS-D-26 - 1	16.381	38	first 1/2 of analysis has good stable 207/206 signal (1828 Ma) with strongly elevated and relatively stable 6/8 and 7/5	82.5492	4.073	0.078	0.14	0.2639	0.0047	0.0092	0.85528	3.78931	0.132102	0.1119	0.0014	0.0014	0.025851	1648	16	27	1509	24	47	1828	22	22	n/a	n/a	n/a	n/a	1845	35	1.89702	1845	35
KR-03-MS	UG Mine Stock	KR-1	PHASE IIb	MAY6	MS-A-19-b	13.423	32	b = first 1/2 of analysis (except very beginning) has relatively stable 207/206 signal (2060 Ma) with strongly elevated to concordant but irregular 6/8 and 7/5	82.5243	5.3	0.36	0.51	0.303	0.021	0.029	0.9637	3.30033	0.315873	0.1275	0.0025	0.0025	0.010626	1856	62	89	1700	100	150	2060	36	36	n/a	n/a	n/a	n/a	2067	47	2.27383	2067	47
LEN-1	Lened pluton	KR-4	PHASE IIb	MAY10	LEN-E-5	7.5824	18	entire analysis is old but irregular signal; first 1/4 has relatively stable 207/206 signal (1973 Ma) and strongly elevated to nearly concordant 6/8 and 7/5	82.4633	4.8	0.28	0.36	0.288	0.02	0.024	0.97114	3.47222	0.289352	0.1213	0.0023	0.0023	0.73127	1780	50	64	1627	99	120	1973	34	34	n/a	n/a	n/a	n/a	1982	41	2.06862	1982	41
03M-220	Ragged pluton	KR-4	Phase IIa	APR26	220-C-20 - 1	14.112	34	first 1/3 of analysis has stable 207/206 signal (2250 Ma) with strongly elevated 6/8 and 7/5	82.3556	6.49	0.36	0.61	0.334	0.018	0.03	0.94452	2.99401	0.268923	0.1422	0.0031	0.0031	-0.22791	2033	57	98	1853	88	150	2250	38	38	n/a	n/a	n/a	n/a	2250	54	2.4	2250	54
SOUTH MAC	Rockslide Mountain pluton	KR-3	PHASE IId	NOV30	SM-A-3-b - 1	28.968	67	b = entire analysis has very good stable 207/206 signal (1913.9 Ma) with strongly elevated and stable 6/8 and 7/5	82.2561	4.474	0.028	0.16	0.2766	0.0014	0.012	0.52384	3.61533	0.156847	0.11728	0.00064	0.0012	0.21545	1725.9	5.2	30	1574.3	7.2	60	1913.9	9.9	18	n/a	n/a	n/a	n/a	1929	73	3.78434	1929	73
KR-03-uMSb	underground Mine Stock	KR-4	PHASE IId	DEC4	uMSb-A-8 - 1	12.369	28	entire analysis is old but last 1/3 has good stable 207/206 signal (1783 Ma) with strongly elevated 6/8 and 7/5	82.1649	3.845	0.059	0.12	0.2552	0.0032	0.0084	0.67841	3.9185	0.128979	0.1091	0.0013	0.0013	0.092617	1602	12	25	1465	17	43	1783	22	22	n/a	n/a	n/a	n/a	1802	49	2.7192	1802	49
MINESTOCKCAN	Mine Stock pluton	KR-4	Phase IIa	APR21	MS-D-29 - 1	13.157	31	first 1/3 of analysis has relatively stable 207/206 signal (1839 Ma) with strongly elevated 7/5 and 6/8 (analysis missed target but still in core)	82.1098	4.08	0.15	0.19	0.264	0.011	0.014	0.94804	3.78788	0.200872	0.1125	0.0015	0.0015	0.44015	1647	30	38	1510	57	70	1839	24	24	n/a	n/a	n/a	n/a	1847	34	1.84082	1847	34
KR-03-uMSa	underground Mine Stock	KR-4	PHASE IIb	MAY10	uMSa-B-9	13.039	30	first 1/2 of analysis has moderately stable 207/206 signal (2715 Ma) with strongly elevated but irregular 6/8 and 7/5	81.547	10.59	0.5	0.71	0.411	0.021	0.029	0.91788	2.43309	0.171678	0.1873	0.0038	0.0038	0.37153	2481	44	63	2214	95	130	2715	33	33	n/a	n/a	n/a	n/a	2726	48	1.76082	2726	48
SOUTHMAC	Rockslide Mountain pluton	KR-3	Phase IIa	APR19	SM-K-5 - 1	12.578	30	first 1/2 of analysis has poorly-moderately stable 207/206 signal (2327 Ma) with strongly elevated but irregular 8/6 and 7/5	81.2205	6.98	0.57	0.7	0.343	0.025	0.033	0.94016	2.91545	0.280495	0.1489	0.0041	0.0041	-0.07988	2090	74	92	1890	120	160	2327	47	47	n/a	n/a	n/a	n/a	2330	60	2.57511	2330	60
03M-220	Ragged pluton	KR-4	PHASE IIb	MAY10	220-C-16	20.37	48	entire analysis has moderately-poorly stable 207/206 signal (1807 Ma) with strongly elevated to concordant 6/8 and 7/5	80.8522	3.96	0.27	0.33	0.255	0.015	0.019	0.95329	3.92157	0.292195	0.1108	0.0021	0.0021	-0.30661	1608	55	68	1461	76	98	1807	35	35	n/a	n/a	n/a	n/a	1859	47	2.52824	1859	47
LEN-1	Lened pluton	KR-4	Phase IIa	APR26	LEN-E-3 - 1	14.444	33	first 1/3 of analysis has stable 207/206 signal (2734 Ma) with strongly elevated 6/8 and 7/5	80.5779	10.33	0.31	0.85	0.408	0.011	0.033	0.94324	2.45098	0.198241	0.1894	0.0031	0.0031	0.30798	2462	28	77	2203	52	150	2734	27	27	n/a	n/a	n/a	n/a	2697	46	1.7056	2697	46
KR-05-208	Little Hyland pluton	KR-1	PHASE IIb	MAY6	208-E-14-b	14.612	34	b = first 1/2 of analysis has good stable 207/206 signal (1847 Ma) with strongly elevated and stable 6/8 and 7/5	80.4548	4.08	0.12	0.3	0.2594	0.0076	0.019	0.90706	3.85505	0.282367	0.1131	0.0014	0.0014	0.24428	1648	23	60	1486	39	98	1847	23	23	n/a	n/a	n/a	n/a	1882	59	3.13496	1882	59
03M-220	Ragged pluton	KR-4	PHASE IId	DEC4	220-F-23-b - 1	12.728	29	b = entire analysis is old @ ~2000 Ma with strongly to moderately elevated 6/8 and 7/5, but first 1/3 has the most stable 207/206 signal (1975 Ma), highest 6/8 and 7/5, and lowest Pb204--"b" is slightly better than "a"	80.0506	4.6	0.14	0.19	0.2781	0.0067	0.011	0.93745	3.59583	0.14223	0.1214	0.0015	0.0015	0.15906	1748	27	36	1581	34	55	1975	21	21	n/a	n/a	n/a	n/a	1971	26	1.31913	1971	26
SOUTHMAC	Rockslide Mountain pluton	KR-4	Phase IIa	APR26	SM-A-11 - 1	10.948	26	1/4 of analysis in first half has moderately stable 207/206 signal (1901 Ma) and strongly elevated 6/8 and 7/5	79.9579	4.27	0.38	0.5	0.268	0.022	0.029	0.96801	3.73134	0.403765	0.1167	0.0028	0.0028	-0.2476	1668	84	110	1520	110	150	1901	44	44	n/a	n/a	n/a	n/a	1904	54	2.83613	1904	54
SOUTH MAC	Rockslide Mountain pluton	KR-3	PHASE IId	NOV30	SM-B-4 - 1	8.8357	20	first 1/4 of analysis has very good stable 207/206 signal (1944 Ma) with strongly elevated 6/8 and 7/5	79.8354	4.47	0.26	0.31	0.273	0.016	0.02	0.99305	3.663	0.268352	0.11928	0.00087	0.0013	-0.24535	1720	49	57	1552	83	100	1944	13	20	n/a	n/a	n/a	n/a	1953	20	1.02407	1953	20
MAC-177a	Cirque Lake pluton	KR-3	Phase IIb	MAY9	177-B-26-b	11.997	28	b (laser file is mislabelled 177-B-26) = most of analysis is old but first 1/3 of analysis has good 207/206 signal (2629 Ma) with strongly elevated 6/8 and 7/5	79.1936	9.32	0.31	0.35	0.3815	0.0096	0.013	0.91035	2.62123	0.0893211	0.1777	0.0024	0.0024	0.077995	2376	25	29	2082	44	62	2629	23	23	n/a	n/a	n/a	n/a	2640	26	0.984848	2640	26
03M-220	Ragged pluton	KR-4	PHASE IId	DEC4	220-E-24 - 1	20.877	48	first 1/2 of analysis has moderately stable 207/206 signal (2116 Ma) with strongly elevated 6/8 and 7/5	79.1588	5.387	0.092	0.17	0.2968	0.0041	0.0099	0.68761	3.36927	0.112385	0.1316	0.002	0.002	0.14863	1882	15	27	1675	20	49	2116	26	26	n/a	n/a	n/a	n/a	2136	47	2.20037	2136	47
03M-220	Ragged pluton	KR-4	PHASE IId	DEC4	220-C-3 - 1	10.496	24	entire analysis is old: first 2/3 has moderate 207/206 signal @ 1724 Ma with elevated 6/8 and 7/5, and last 1/3 of analysis has moderate 207/206 signal (1889 Ma) with strongly elevated 6/8 and 7/5--hard to decide which segment to keep	78.4013	4.15	0.25	0.28	0.259	0.014	0.016	0.90424	3.861	0.238518	0.116	0.0036	0.0036	-0.23846	1656	54	59	1481	71	82	1889	56	56	n/a	n/a	n/a	n/a	1917	53	2.76474	1917	53
MAC-177a	Cirque Lake pluton	KR-3	PHASE IId	NOV30	177-B-23 - 1	11.694	27	middle 1/3 of analysis has moderately poor 207/206 signal (1107 Ma) with strongly elevated 6/38 and 7/35	77.5068	1.426	0.046	0.068	0.1424	0.0046	0.0076	0.63129	7.02247	0.374795	0.0766	0.0017	0.0018	0.61091	899	19	29	858	26	43	1107	44	47	n/a	n/a	n/a	n/a	1019	98	9.61727	1019	98
SOUTHMAC	Rockslide Mountain pluton	KR-3	Phase IIa	APR19	SM-J-8 - 1	13.532	32	first 1/2 of analysis has moderately stable 207/206 signal (2558 Ma) with strongly elevated 8/6 and 7/5	77.0133	8.43	0.86	1	0.36	0.033	0.039	0.97979	2.77778	0.300926	0.1705	0.0041	0.0041	-0.59363	2240	100	120	1970	160	190	2558	41	41	n/a	n/a	n/a	n/a	2571	40	1.55581	2571	40
03M-220	Ragged pluton	KR-4	Phase IIa	APR26	220-F-11 - 1	21.808	52	first 1/2 of analysis has stable 207/206 signal (2580 Ma) with strongly elevated 6/8 and 7/5	76.2403	8.6	0.35	0.75	0.358	0.015	0.031	0.96205	2.7933	0.241878	0.1727	0.0024	0.0024	0.095346	2287	40	85	1967	75	150	2580	24	24	n/a	n/a	n/a	n/a	2615	41	1.56788	2615	41
LEN-1	Lened pluton	KR-4	PHASE IIb	MAY10	LEN-G-12	23.443	55	entire analysis has poor but stable 207/206 signal (1761 Ma) with strongly elevated and stable 6/8 and 7/5	75.866	3.44	0.24	0.29	0.228	0.012	0.016	0.88187	4.38596	0.307787	0.1087	0.0035	0.0035	-0.29182	1518	52	64	1336	59	79	1761	61	61	n/a	n/a	n/a	n/a	1813	74	4.08163	1813	74
SOUTH MAC	Rockslide Mountain pluton	KR-3	PHASE IId	NOV30	SM-D-10-a - 1	9.3548	21	a = first 1/4 of analysis has moderately stable 207/206 signal (1891 Ma) with strongnly eelvated 6/8 and 7/5	75.6214	3.97	0.34	0.37	0.249	0.021	0.024	0.98688	4.01606	0.387091	0.1158	0.0016	0.0018	-0.21019	1616	73	79	1430	110	120	1891	24	28	n/a	n/a	n/a	n/a	1910	32	1.67539	1910	32
KR-05-110	Cac pluton	KR-2	PHASE IIb	MAY6	110-B-27-b	9.9689	23	b = first 1/3 of analysis has moderately stable 207/206 signal (1798 Ma) with strongly elevated 6/8 and 7/5	74.5273	3.54	0.44	0.5	0.232	0.026	0.03	0.98744	4.31034	0.557372	0.1092	0.0029	0.0029	-0.61263	1510	110	120	1340	140	160	1798	39	39	n/a	n/a	n/a	n/a	1833	42	2.29133	1833	42
03M-207	underground Mine Stock	KR-1	PHASE IId	NOV28	207-E-14 - 1	18.812	43	first 2/3 of analysis has good stable 207/206 signal (1802 Ma) with strongly elevated 6/8 and 7/5	74.3618	3.558	0.087	0.16	0.2312	0.0052	0.011	0.928	4.32526	0.205787	0.1103	0.001	0.001	0.050318	1538	19	36	1340	27	55	1802	17	17	n/a	n/a	n/a	n/a	1850	34	1.83784	1850	34
MINE STOCK CAN	Mine Stock pluton	KR-4	PHASE IId	DEC4	MS-F-21 - 1	16.268	37	first 1/2 of analysis has moderately stable 207/206 signal (2667 Ma) with strongly to moderately elevated 6/8 and 7/5	74.2407	9.11	0.71	0.76	0.363	0.027	0.029	0.99203	2.75482	0.220082	0.1818	0.0022	0.0022	-0.59645	2323	79	83	1980	130	140	2667	20	20	n/a	n/a	n/a	n/a	2688	17	0.63244	2688	17
SOUTHMAC	Rockslide Mountain pluton	KR-3	Phase IIb	MAY9	SM-G-22	12.25	28	first 1/2 of analysis has good 207/206 signal (2506 Ma) with strongly elevated 6/8 and 7/5	73.8228	7.69	0.51	0.53	0.335	0.023	0.025	0.97963	2.98508	0.222767	0.165	0.0024	0.0024	0.26494	2184	60	62	1850	110	120	2506	24	24	n/a	n/a	n/a	n/a	2541	29	1.14128	2541	29
SOUTH MAC	Rockslide Mountain pluton	KR-4	PHASE IId	DEC4	SM-A-5 - 1	25.94	59	entire analysis has moderately stable signal @ 1890 Ma, but first 3/4 has the highest 6/8 and 7/5 (1896 Ma)	73.7342	3.901	0.095	0.14	0.2423	0.0049	0.0088	0.87345	4.12711	0.149891	0.1162	0.0013	0.0013	-0.089046	1611	20	30	1398	25	46	1896	20	20	n/a	n/a	n/a	n/a	1931	34	1.76075	1931	34
MAC-197-B	Cirque Lake pluton	KR-3	PHASE IId	DEC4	197B-E-20-a - 1	18.119	42	a = first 2/3 of analysis has good stable 207/206 signal (2563 Ma) with strongly elevated 6/8 and 7/5	73.6637	8.03	0.29	0.36	0.341	0.011	0.015	0.98023	2.93255	0.128998	0.1707	0.0014	0.0014	-0.52625	2229	34	43	1888	52	72	2563	14	14	n/a	n/a	n/a	n/a	2584	15	0.580495	2584	15
03M-220	Ragged pluton	KR-4	Phase IIa	APR21	220-C-18-a - 1	13.181	31	a (INNER CORE) = entire analysis has old 207/206 but second 1/4 has most stable 207/206 signal (2607 Ma) with strongly elevated 6/8 and 7/5 (first 1/4 has stable signal at ~2500 Ma; analysis missed target)	73.6479	8.33	0.72	0.76	0.35	0.032	0.034	0.98014	2.85714	0.277551	0.1754	0.003	0.003	0.23064	2245	80	85	1920	150	160	2607	29	29	n/a	n/a	n/a	n/a	2601	36	1.38408	2601	36
MINE STOCK CAN	Mine Stock pluton	KR-4	PHASE IId	DEC4	MS-D-19 - 1	30.169	69	entire analysis has moderately good stable 207/206 signal (1882 Ma) with strongly elevated 6/8 and 7/5	73.5919	3.82	0.15	0.18	0.2401	0.0087	0.011	0.96659	4.16493	0.190813	0.1151	0.0011	0.0011	-0.12755	1589	32	39	1385	45	59	1882	18	18	n/a	n/a	n/a	n/a	1909	23	1.20482	1909	23
MINESTOCKCAN	Mine Stock pluton	KR-4	Phase IIa	APR21	MS-A-19 - 1	10.398	24	1/4 of analysis in first 1/2 has moderately stable 207/206 signal (1829 Ma) with strongly elevated 6/8 and 7/5 (analysis missed target)	73.5375	3.57	0.14	0.17	0.2323	0.0088	0.011	0.75251	4.30478	0.203842	0.1121	0.003	0.003	0.28746	1540	31	39	1345	46	59	1829	48	48	n/a	n/a	n/a	n/a	1847	63	3.41094	1847	63
03M-220	Ragged pluton	KR-4	PHASE IIb	MAY10	220-D-11	14.36	33	first 1/2 of analysis has moderately good stable 207/206 signal (1678 Ma) with strongly elevated to nearly concordant 6/8 and 7/5	73.4245	3.03	0.26	0.29	0.212	0.018	0.021	0.97648	4.71698	0.467248	0.1034	0.0017	0.0017	0.16914	1395	73	84	1235	98	110	1682	31	31	n/a	n/a	n/a	n/a	1716	44	2.5641	1716	44
MINESTOCKCAN	Mine Stock pluton	KR-4	Phase IIa	APR26	MS-A-3-b - 1	19.009	45	b = first 1/2 of analysis has relatively stable 207/206 signal (2487 Ma) with strongly elevated but irregular 6/8 and 7/5	73.1805	7.53	0.56	0.8	0.328	0.023	0.034	0.96962	3.04878	0.316032	0.1634	0.0032	0.0032	-0.43415	2165	72	100	1820	110	160	2487	33	33	n/a	n/a	n/a	n/a	2543	44	1.73024	2543	44
KR-03-MS	UG Mine Stock	KR-1	Phase IIa	APR19	MS-A-17-b - 1	10.118	23	b = first 1/4 of analysis has stable 207/206 signal (2638 Ma) with strongly elevated 8/6 and 7/5	73.1615	8.58	0.28	0.58	0.349	0.012	0.025	0.93428	2.86533	0.205253	0.1787	0.0035	0.0035	0.23164	2292	30	62	1930	60	120	2638	32	32	n/a	n/a	n/a	n/a	2656	44	1.65663	2656	44
LEN-1	Lened pluton	KR-4	PHASE IId	DEC4	LEN-D-11 - 1	18.9	43	entire analysis has good stable 207/206 signal @ 1767 Ma, but last 1/2 is the most concordant and stable (1760 Ma) with strongly elevated 6/8 and 7/5	73.0114	3.277	0.098	0.13	0.2208	0.0063	0.0092	0.92977	4.52899	0.188708	0.1077	0.001	0.001	0.14064	1473	23	31	1285	33	49	1760	17	17	n/a	n/a	n/a	n/a	1785	30	1.68067	1785	30
SOUTHMAC	Rockslide Mountain pluton	KR-3	Phase IIb	MAY9	SM-I-9-b	10.175	24	b = most of analysis is old (>2.5 Ga, and ~2.75 Ga in first 1/5), but 2nd 1/3 of analysis has the most stable moderate-poor 207/206 signal (2609 Ma) with strongly elevated 6/8 and 7/5	72.8248	8.45	0.93	0.95	0.347	0.036	0.038	0.95576	2.88184	0.315591	0.176	0.0056	0.0056	-0.29431	2250	120	120	1900	180	180	2609	53	53	n/a	n/a	n/a	n/a	2640	56	2.12121	2640	56
MINE STOCK CAN	underground Mine Stock	KR-4	PHASE IIb	MAY10	MS-F-18-b	17.477	42	b = first 2/3 of analysis has poorly stable 207/206 signal (1730 Ma) with strongly elevated 6/8 and 7/5, but age agrees with the few seconds that are the most stable and concordant portion of the signal	72.3121	3.18	0.23	0.28	0.215	0.014	0.018	0.9425	4.65116	0.3894	0.1057	0.0024	0.0024	-0.13183	1435	59	71	1251	77	94	1730	45	45	n/a	n/a	n/a	n/a	1780	56	3.14607	1780	56
SOUTHMAC	Rockslide Mountain pluton	KR-3	Phase IIa	APR19	SM-I-5-b - 1	10.368	24	b = second 1/4 has relatively stable 207/206 signal (1830 Ma) with strongly elevated 8/6 and 7/5	72.1311	3.54	0.35	0.41	0.228	0.021	0.026	0.97164	4.38596	0.500154	0.1122	0.0031	0.0031	-0.31229	1514	90	100	1320	110	140	1830	50	50	n/a	n/a	n/a	n/a	1868	52	2.78373	1868	52
SOUTHMAC	Rockslide Mountain pluton	KR-3	Phase IIb	MAY9	SM-D-11	10.193	24	first 1/3 of analysis has relatively stable 207/206 signal (1789 Ma) with strongly elevated 6/8 and 7/5 (last 1/2 of analysis has very poor 7/6 signal about the same age, with less elevated 6/8 and 7/5)	71.2689	3.35	0.32	0.33	0.22	0.019	0.02	0.98411	4.54545	0.413223	0.1096	0.0022	0.0022	-0.55909	1477	75	77	1275	99	100	1789	36	36	n/a	n/a	n/a	n/a	1834	33	1.79935	1834	33
SOUTHMAC	Rockslide Mountain pluton	KR-3	Phase IIb	MAY9	SM-I-21	9.9772	23	entire analysis is 2690 Ma but last 1/3 has most stable 207/206 signal (2671 Ma) with strongly elevated 6/8 and 7/5	71.1344	8.7	1.2	1.2	0.347	0.048	0.049	0.98765	2.88184	0.406946	0.1823	0.0042	0.0042	0.32219	2260	150	150	1900	240	240	2671	38	38	n/a	n/a	n/a	n/a	2690	40	1.48699	2690	40
03M-220	Ragged pluton	KR-4	PHASE IIb	MAY10	220-F-3	14.585	34	entire analysis is old but first 1/2 has good stable 207/206 signal (2700 Ma) and strongly elevated 6/8 and 7/5	70.4815	8.83	0.44	0.61	0.344	0.018	0.024	0.94486	2.90698	0.202812	0.1855	0.0029	0.0029	0.2961	2312	47	66	1903	86	120	2700	26	26	n/a	n/a	n/a	n/a	2730	39	1.42857	2730	39
03M-220	Ragged pluton	KR-4	PHASE IIb	MAY10	220-G-5	11.282	27	first 1/3 of analysis appears to be Cretaceous, but middle 1/3 has relatively stable 207/206 signal (1753 Ma) with strongly elevated 6/8 and 7/5	69.595	3.17	0.47	0.49	0.21	0.029	0.031	0.99369	4.7619	0.702948	0.1075	0.0022	0.0022	-0.60909	1390	140	150	1220	160	170	1753	38	38	n/a	n/a	n/a	n/a	1821	32	1.75728	1821	32
03M-220	Ragged pluton	KR-4	PHASE IIb	MAY10	220-G-29	10.027	24	entire analysis is old but first 1/3 has good stable 207/206 signal (1999 Ma) with strongly elevated 6/8 and 7/5	69.0345	4.06	0.4	0.45	0.24	0.024	0.027	0.9806	4.16667	0.46875	0.1231	0.0023	0.0023	0.40757	1625	89	99	1380	130	140	1999	33	33	n/a	n/a	n/a	n/a	2023	42	2.07612	2023	42
03M-207	UG Mine Stock	KR-1	Phase IIa	APR19	207-B-21-a - 1	10.787	25	a= first 1/4 of analysis has relatively 207/206 stable signal (1913 Ma) with significantly elevated 6/8 and 7/5	69.0016	3.73	0.53	0.58	0.23	0.031	0.034	0.99318	4.34783	0.642722	0.1174	0.0022	0.0022	-0.41376	1540	120	130	1320	170	180	1913	34	34	n/a	n/a	n/a	n/a	1948	33	1.69405	1948	33
MINE STOCK CAN	underground Mine Stock	KR-4	PHASE IIb	MAY10	MS-H-20-b	7.3978	17	b = first 1/4 of analysis has moderately-poorly stable 207/206 signal (2146 Ma) with strongly elevated 6/8 and 7/5	68.4995	4.78	0.49	0.54	0.257	0.026	0.028	0.97391	3.89105	0.423928	0.1339	0.0034	0.0034	0.12854	1766	91	100	1470	130	150	2146	44	44	n/a	n/a	n/a	n/a	2190	46	2.10046	2190	46
MAC-177a	Cirque Lake pluton	KR-4	Phase IIa	APR21	177-A-23 - 1	14.919	35	first 1/3 of analysis (except very beginning, which is cretaceous) has stable 207/206 signal (2553 Ma) with strongly elevated 6/8 and 7/5 (analysis missed target)	67.7634	7.3	0.61	0.65	0.311	0.026	0.028	0.97496	3.21543	0.289492	0.1698	0.0031	0.0031	-0.24333	2122	83	88	1730	130	140	2553	31	31	n/a	n/a	n/a	n/a	2585	35	1.35397	2585	35
SOUTH MAC	Rockslide Mountain pluton	KR-4	PHASE IIb	MAY10	SM-B-21	14.57	34	middle 1/2 of analysis has moderately-poor stable 207/206 signal (1820 Ma) with strongly elevated 6/8 and 7/5	67.5824	3.22	0.38	0.41	0.212	0.025	0.027	0.97893	4.71698	0.600748	0.1117	0.0028	0.0028	0.16547	1420	100	110	1230	130	140	1820	45	45	n/a	n/a	n/a	n/a	1832	51	2.78384	1832	51
SOUTHMAC	Rockslide Mountain pluton	KR-3	Phase IIa	APR19	SM-H-20 - 1	21.146	49	first 1/2 of analysis has poorly stable 207/206 signal (1499 Ma) with notably to strongly elevated 8/6 and 7/5; signal is very messy with U238 counts all over the place	66.044	2.21	0.3	0.33	0.168	0.021	0.023	0.92948	5.95238	0.814909	0.0937	0.0032	0.0032	-0.17919	1130	97	110	990	120	130	1499	68	68	n/a	n/a	n/a	n/a	1575	110	6.98413	1575	110
KR-05-110	Cac pluton	KR-2	PHASE IIb	MAY6	110-B-28	10.299	24	1/3 of analysis in first 1/2 has relatively stable 207/206 signal (1921 Ma) with strongly elevated 6/8 and 7/6	65.5908	3.56	0.43	0.49	0.217	0.025	0.029	0.98311	4.6083	0.615855	0.118	0.0029	0.0029	-0.13465	1510	110	120	1260	130	150	1921	46	46	n/a	n/a	n/a	n/a	1975	47	2.37975	1975	47
KR-03-MS	UG Mine Stock	KR-1	PHASE IIb	MAY6	MS-A-6-b	15.192	35	b = first 1/2 of analysis has stable 207/206 signal (2565 Ma) with strongly elevated 6/8 and 7/5	65.3144	6.41	0.78	0.9	0.287	0.034	0.04	0.98992	3.48432	0.48562	0.1612	0.0027	0.0027	-0.21613	1970	130	150	1610	180	200	2465	29	29	n/a	n/a	n/a	n/a	2505	35	1.39721	2505	35
03M-220	Ragged pluton	KR-4	PHASE IIb	MAY10	220-E-5	16.655	39	entire analysis is old but middle 1/2 has good stable 207/206 signal (2543 Ma) and strongly elevated 6/8 and 7/5	65.2772	6.93	0.68	0.76	0.296	0.029	0.032	0.98451	3.37838	0.36523	0.1689	0.003	0.003	-0.07596	2063	95	110	1660	150	160	2543	29	29	n/a	n/a	n/a	n/a	2584	33	1.27709	2584	33
03M-220	Ragged pluton	KR-4	Phase IIa	APR26	220-B-13-b - 1	16.11	38	b = first 1/3 of analysis has moderate 207/206 signal (1748 Ma) with strongly elevated 6/8 and 7/5 (entire analysis has old 7/6)	65.2174	2.94	0.31	0.39	0.194	0.019	0.024	0.98561	5.15464	0.637687	0.1067	0.0017	0.0017	-0.52564	1362	82	100	1140	100	130	1748	32	32	n/a	n/a	n/a	n/a	1836	42	2.28758	1836	42
KR-03-uMSa	underground Mine Stock	KR-4	PHASE IIb	MAY10	uMSa-A-15	17.868	42	first 1/2 of analysis has moderately stable 207/206 signal (1840 Ma) with strongly elevated 6/8 and 7/5	65.1087	3.2	0.29	0.33	0.206	0.018	0.02	0.98272	4.85437	0.471298	0.1127	0.0018	0.0018	-0.091031	1428	80	90	1198	98	110	1840	29	29	n/a	n/a	n/a	n/a	1877	35	1.86468	1877	35
03M-207	UG Mine Stock	KR-1	PHASE IIb	MAY6	207-A-21-b	9.9959	23	b = first 1/3 of analysis has moderately stable 207/206 signal (1994 Ma) with strongly elevated 6/8 and 7/5	64.1926	3.77	0.38	0.46	0.221	0.02	0.025	0.96105	4.52489	0.511865	0.1229	0.0032	0.0032	-0.22417	1569	81	98	1280	110	130	1994	45	45	n/a	n/a	n/a	n/a	2046	61	2.98143	2046	61
MINE STOCK CAN	underground Mine Stock	KR-4	PHASE IIb	MAY10	MS-I-2	11.86	28	b = first 1/3 of analysis has moderately stable 207/206 signal (1819 Ma) with strongly elevated 6/8 and 7/5	64.1561	3.05	0.31	0.34	0.199	0.018	0.02	0.98658	5.02513	0.505038	0.1108	0.0017	0.0017	-0.55901	1401	78	86	1167	97	110	1819	33	33	n/a	n/a	n/a	n/a	1855	35	1.88679	1855	35
MAC-177a	Cirque Lake pluton	KR-3	Phase IIb	MAY9	177-C-21-b	10.966	26	b = entire analysis is old but first 1/3 of analysis has most stable 207/206 signal (1849 Ma) with strongly elevated 6/8 and 7/5	63.8183	3.18	0.29	0.3	0.203	0.019	0.02	0.97236	4.92611	0.485331	0.1133	0.0026	0.0026	0.22064	1435	77	78	1180	100	110	1849	39	39	n/a	n/a	n/a	n/a	1895	46	2.42744	1895	46
KR-03-uMSa	underground Mine Stock	KR-4	PHASE IIb	MAY10	uMSa-A-9	12.971	30	first 1/2 of analysis has moderately stable 207/206 signal (1824 Ma) with strongly elevated 6/8 and 7/5	62.8289	3	0.15	0.21	0.1948	0.0094	0.013	0.93407	5.13347	0.342583	0.1117	0.002	0.002	-0.014296	1403	40	55	1146	51	71	1824	31	31	n/a	n/a	n/a	n/a	1867	47	2.51741	1867	47
KR-05-148	Rifle Range pluton	KR-2	Phase IIa	APR19	148-E-27-c - 1	20.263	47	c = first 1/2 of analysis has relatively stable 207/206 signal (1850 Ma) with strongly elevated (to nearly concordant at end of cropped signal) 8/6 and 7/35	62.7568	3.13	0.22	0.28	0.198	0.012	0.017	0.97413	5.05051	0.433629	0.1133	0.0015	0.0015	-0.37717	1423	55	72	1161	65	93	1850	24	24	n/a	n/a	n/a	n/a	1914	38	1.98537	1914	38
MAC-177a	Cirque Lake pluton	KR-3	PHASE IId	NOV30	177-C-14-c - 1	13.962	32	c = entire analysis is old, but 1/3 of analysis in first 1/2 has good stable 207/206 signal (2616 Ma) with strongly elevated 6/8 and 7/5	61.0856	6.91	0.34	0.42	0.282	0.013	0.017	0.98433	3.5461	0.213772	0.1762	0.0017	0.0023	-0.33507	2093	46	57	1598	65	89	2616	16	21	n/a	n/a	n/a	n/a	2665	19	0.712946	2665	19
KR-05-110	Cac pluton	KR-2	PHASE IId	NOV30	110-B-24-b - 1	12.093	28	b = last 1/3 of analysis has moderately poor 207/206 signal (1768 Ma) with strongly elevated 6/8 and 7/5	60.9729	2.7	0.14	0.17	0.1823	0.0099	0.013	0.97125	5.48546	0.391174	0.1083	0.0015	0.0017	0.057559	1324	40	48	1078	54	69	1768	25	30	n/a	n/a	n/a	n/a	1799	39	2.16787	1799	39
03M-220	Ragged pluton	KR-4	PHASE IId	DEC4	220-E-4 - 1	19.202	44	entire analysis is ~1380 Ma, but last 2/3 has moderately good stable 207/206 signal (1387 Ma) with strongly elevated 6/8 and 7/5	60.7066	1.71	0.11	0.12	0.14	0.0091	0.01	0.97501	7.14286	0.510204	0.0884	0.0014	0.0014	-0.018618	1002	44	47	842	51	57	1387	30	30	n/a	n/a	n/a	n/a	1446	35	2.42047	1446	35
MINESTOCKCAN	Mine Stock pluton	KR-4	Phase IIa	APR26	MS-B-31-b - 1	8.5549	20	b = first 1/5 of analysis has moderately stable 207/206 signal (2239 Ma) with strongly elevated 6/8 and 7/5	60.5628	4.48	0.32	0.47	0.235	0.016	0.023	0.94535	4.25532	0.416478	0.1412	0.0028	0.0028	-0.12525	1742	47	70	1356	83	120	2239	34	34	n/a	n/a	n/a	n/a	2242	60	2.67618	2242	60
MAC-165a	leucogranite dyke in Cirque Lake pluton	KR-4	PHASE IIb	MAY10	165-A-21	10.093	24	first 1/3 of analysis has moderately-poor 207/206 signal (2590 Ma) with strongly elevated 6/8 and 7/5	60.2317	6.63	0.97	1	0.276	0.037	0.039	0.97728	3.62319	0.511972	0.1739	0.0051	0.0051	-0.24294	2050	130	140	1560	200	210	2590	49	49	n/a	n/a	n/a	n/a	2633	54	2.05089	2633	54
SOUTHMAC	Rockslide Mountain pluton	KR-3	Phase IIb	MAY9	SM-F-16	7.7284	18	multiple short poor 207/206 plateaus at ~1800, 2200, and 2450 Ma, all with elevated 6/8 and 7/5; last plateau has poor 207/206 signal (2448 Ma) with most elevated 6/8 and 7/5	60.049	6	1.5	1.5	0.263	0.059	0.059	0.98807	3.80228	0.852983	0.1604	0.0082	0.0082	-0.56035	1860	240	240	1470	300	300	2448	89	89	n/a	n/a	n/a	n/a	2548	68	2.66876	2548	68
MAC-197	Cirque Lake pluton	KR-3	Phase IIa	APR19	197B-C-24-c - 1	10.785	26	c = 1/4 in middle of analysis has moderately stable 207/206 signal (1926 Ma) with strongly elevated 8/6 and 7/5	59.8131	3.31	0.21	0.28	0.1958	0.0082	0.015	0.80647	5.10725	0.39126	0.1186	0.0045	0.0045	-0.053981	1477	48	66	1152	44	78	1926	66	66	n/a	n/a	n/a	n/a	2041	94	4.60559	2041	94
KR-05-110	Cac pluton	KR-2	Phase IIa	APR19	110-C-28-b - 1	6.9074	16	b = first 1/6 of analysis has relatively stable 207/206 signal (2195 Ma) with strongly elevated humped 8/6 and 7/5	59.6811	4.33	0.52	0.58	0.227	0.026	0.029	0.97681	4.40529	0.56279	0.1377	0.0039	0.0039	-0.3971	1680	110	120	1310	130	150	2195	49	49	n/a	n/a	n/a	n/a	2246	51	2.2707	2246	51
SOUTHMAC	Rockslide Mountain pluton	KR-3	Phase IIb	MAY9	SM-J-4	7.7304	18	1/4 of analysis in first half has relatively stable 207/206 signal (1955 Ma) with elevated 6/8 and 7/5	57.8005	3.25	0.67	0.67	0.194	0.039	0.039	0.98876	5.15464	1.03624	0.1202	0.0029	0.0029	-0.096975	1410	170	170	1130	210	210	1955	43	43	n/a	n/a	n/a	n/a	2025	58	2.8642	2025	58
03M-220	Ragged pluton	KR-4	PHASE IIb	MAY10	220-C-28	22.626	53	entire analysis has moderately-poorly stable 207/206 signal (1800 Ma) with irregular but strongly elevated 6/8 and 7/5	56.7222	2.63	0.25	0.28	0.173	0.017	0.019	0.96522	5.78035	0.634836	0.1107	0.0029	0.0029	0.071121	1275	74	83	1021	94	100	1800	48	48	n/a	n/a	n/a	n/a	1854	58	3.12837	1854	58
03M-220	Ragged pluton	KR-4	Phase IIa	APR26	220-F-13 - 1	10.773	26	first 1/4 of analysis has moderate 207/206 signal (1926 Ma) with strongly to notably elevated 6/8 and 7/5	56.594	3.14	0.62	0.66	0.187	0.035	0.037	0.99072	5.34759	1.05808	0.1184	0.0035	0.0035	-0.1657	1360	170	180	1090	190	200	1926	54	54	n/a	n/a	n/a	n/a	2033	52	2.5578	2033	52
SOUTHMAC	Rockslide Mountain pluton	KR-3	Phase IIa	APR19	SM-F-7 - 1	14.31	34	first 1/2 (except beginning) has relatively stable 207/206 signal (1784 Ma) with strongly elevated but irregular 8/6 and 7/5	56.5583	2.57	0.24	0.29	0.17	0.016	0.019	0.97786	5.88235	0.657439	0.1093	0.0021	0.0021	-0.098444	1270	73	86	1009	88	110	1784	36	36	n/a	n/a	n/a	n/a	1846	47	2.54605	1846	47
MINE STOCK CAN	Mine Stock pluton	KR-4	PHASE IId	DEC4	MS-A-14-a - 1	29.722	69	a = entire analysis has good stable 207/206 signal (1751 Ma) with moderately to strongly elevated 6/8 and 7/5	56.482	2.47	0.14	0.15	0.1664	0.0089	0.01	0.98855	6.00962	0.361155	0.10724	0.00092	0.00092	-0.20002	1249	40	44	989	49	56	1751	16	16	n/a	n/a	n/a	n/a	1813	19	1.04799	1813	19
LEN-1	Lened pluton	KR-4	PHASE IIb	MAY10	LEN-E-14	10.09	23	entire analysis is old but 6/8 and 7/5 are very irregular so 207/206 signal is poor; last 1/3 appears to be the most stable 207/206 signal (2606 Ma) with mostly strongly elevated 6/8 and 7/5	56.0246	6.25	0.81	0.86	0.256	0.033	0.035	0.9771	3.90625	0.534058	0.1759	0.0066	0.0066	-0.17288	2010	110	110	1460	170	180	2606	64	64	n/a	n/a	n/a	n/a	2667	51	1.91226	2667	51
SOUTHMAC	Rockslide Mountain pluton	KR-3	Phase IIa	APR19	SM-F-8 - 1	14.923	36	middle 1/2 has moderately well defined 207/206 signal (2532 Ma) with strongly elevated but irregular 8/6 and 7/5	55.2923	5.71	0.55	0.64	0.244	0.023	0.027	0.94952	4.09836	0.453507	0.1682	0.0046	0.0046	-0.072339	1900	91	110	1400	120	140	2532	46	46	n/a	n/a	n/a	n/a	2598	62	2.38645	2598	62
MINE STOCK CAN	underground Mine Stock	KR-4	PHASE IIb	MAY10	MS-A-14-b	13.971	33	b = first 2/3 of analysis averages ~1650 with strongly elevated but very irregular 6/8 and 7/5, but first 1/2 has most stable (poorly) 207/206 signal (1702 Ma)	54.6416	2.31	0.35	0.36	0.157	0.021	0.023	0.98594	6.36943	0.933101	0.1047	0.0028	0.0028	-0.33457	1170	100	110	930	120	120	1702	50	50	n/a	n/a	n/a	n/a	1803	50	2.77316	1803	50
KR-05-175	Lened pluton	KR-2	PHASE IIb	MAY6	175-A-1	17.27	41	entire analysis has poor 207/206 signal but last 1/2 (1614 Ma) has most elevated (but irregular) 6/8 and 7/5	54.2751	2.05	0.24	0.28	0.147	0.017	0.019	0.93569	6.80272	0.879263	0.1005	0.0041	0.0041	0.00013761	1102	77	90	876	92	110	1614	78	78	n/a	n/a	n/a	n/a	1707	95	5.56532	1707	95
KR-03-MS	UG Mine Stock	KR-1	PHASE IIb	MAY6	MS-B-19-b	9.9719	24	b = first 1/3 of analysis has moderately-poorly stable 207/206 signal (2615 Ma) with strongly elevated but irregular 6/8 and 7/5	53.9197	6.07	0.78	0.88	0.246	0.026	0.031	0.96295	4.06504	0.512261	0.1768	0.0065	0.0065	-0.42272	1950	110	130	1410	130	160	2615	61	61	n/a	n/a	n/a	n/a	2688	66	2.45536	2688	66
03M-220	Ragged pluton	KR-4	Phase IIa	APR26	220-F-29-b - 1	10.648	25	b = first 1/4 of analysis has stable 207/206 signal (2543 Ma) with strongly elevated 6/8 and 7/5	53.7554	5.44	0.46	0.62	0.237	0.019	0.026	0.9852	4.21941	0.462889	0.1688	0.0026	0.0026	-0.19196	1875	75	100	1367	99	140	2543	26	26	n/a	n/a	n/a	n/a	2568	34	1.32399	2568	34
MINE STOCK CAN	Mine Stock pluton	KR-4	PHASE IId	DEC4	MS-H-18 - 1	16.483	38	last 1/2 of analysis has good stable 207/206 signal (1755 Ma) with moderately to strongly elevated 6/8 and 7/5	53.4473	2.33	0.18	0.19	0.157	0.011	0.012	0.97591	6.36943	0.486835	0.1076	0.0018	0.0018	-0.10102	1209	57	60	938	64	70	1755	31	31	n/a	n/a	n/a	n/a	1820	34	1.86813	1820	34
KR-05-215	surface Mine Stock	KR-1	PHASE IIb	MAY6	215-A-7	8.8705	21	first 1/4 of analysis has relatively stable 207/206 signal (2004 Ma) with strongly elevated 6/8 and 7/5	52.3952	3.02	0.19	0.28	0.1771	0.0094	0.015	0.9507	5.64653	0.478249	0.1235	0.0023	0.0023	-0.44128	1407	49	73	1050	52	84	2004	32	32	n/a	n/a	n/a	n/a	2068	52	2.51451	2068	52
SOUTH MAC	Rockslide Mountain pluton	KR-3	PHASE IId	NOV30	SM-H-1-b - 1	8.2526	19	b = first 1/5 of analysis has moderately stable 207/206 signal (1837 Ma) with elevated 6/8 and 7/5	52.368	2.49	0.12	0.15	0.161	0.0066	0.0095	0.9394	6.21118	0.366498	0.1125	0.0022	0.0024	-0.25111	1265	36	44	962	37	53	1837	35	38	n/a	n/a	n/a	n/a	1896	40	2.1097	1896	40
SOUTH MAC	Rockslide Mountain pluton	KR-3	PHASE IId	NOV30	SM-H-10 - 1	24.301	56	most of analysis has moderate to good stable 207/206 signal (2002 Ma) with modeately elevated 6/8 and 7/5	51.2987	2.935	0.076	0.13	0.1728	0.0044	0.0085	0.89807	5.78704	0.284663	0.1232	0.0011	0.0015	0.075648	1393	21	36	1027	24	47	2002	17	22	n/a	n/a	n/a	n/a	2063	42	2.03587	2063	42
KR-05-148	Rifle Range pluton	KR-3	Phase IIb	MAY9	148-E-1-a	16.43	39	a = first 1/2 of analysis has good 207/206 signal (1711 Ma) with strongly elevated but irregular 6/8 and 7/5	50.6137	2.12	0.22	0.22	0.145	0.014	0.015	0.98998	6.89655	0.713436	0.1046	0.0019	0.0019	-0.51334	1129	79	81	866	82	85	1711	30	30	n/a	n/a	n/a	n/a	1801	32	1.77679	1801	32
MAC-177a	Cirque Lake pluton	KR-3	Phase IIa	APR19	177-A-10-c - 1	16.616	39	c = first 1/2 of analysis has relatively stable 207/206 signal (1889 Ma) with notably elevated 8/6 and 7/5	49.9206	2.5	0.17	0.22	0.158	0.01	0.014	0.97801	6.32911	0.560808	0.1158	0.0015	0.0015	0.032623	1260	49	65	943	56	78	1889	23	23	n/a	n/a	n/a	n/a	1941	38	1.95775	1941	38
LEN-1	Lened pluton	KR-4	PHASE IId	DEC4	LEN-G-19-a - 1	9.9782	23	a = first 1/2 of analysis has moderate to poor signal @ 1300 Ma and moderately elevated 6/8 and 7/5, but last 1/3 has moderate 207/206 signal (1650 Ma) with more elevated 6/8 and 7/5	49.5152	1.896	0.064	0.082	0.1351	0.0037	0.0055	0.79253	7.40193	0.301337	0.1016	0.0021	0.0021	-0.0020495	1078	22	29	817	21	31	1650	38	38	n/a	n/a	n/a	n/a	1731	54	3.11958	1731	54
KR-03-uMSb	underground Mine Stock	KR-4	PHASE IId	DEC4	uMSb-B-17 - 1	10.124	23	entire analysis is old but last 1/4 of analysis has good stable 207/206 signal (2470 Ma) with moderately-strongly elevated 6/8 and 7/5	49.4332	4.66	0.22	0.25	0.2087	0.0082	0.01	0.93004	4.79157	0.229591	0.1616	0.0029	0.0029	-0.27157	1756	39	45	1221	44	55	2470	30	30	n/a	n/a	n/a	n/a	2532	34	1.34281	2532	34
03M-207	underground Mine Stock	KR-1	PHASE IId	NOV28	207-D-20--b - 1	10.24	23	b = middle of 1/3 analysis has good stable 207/206 signal (1957 Ma) at top of hump with strongly elevated 6/8 and 7/5	49.208	2.7	0.13	0.17	0.1613	0.0084	0.011	0.94685	6.19963	0.422789	0.1202	0.0021	0.0021	0.14001	1326	37	47	963	47	59	1957	31	31	n/a	n/a	n/a	n/a	2045	44	2.15159	2045	44
MINE STOCK CAN	Mine Stock pluton	KR-4	PHASE IId	DEC4	MS-G-11 - 1	13.808	32	first 1/3 of analysis has good stable and concordant 207/206 signal (948 Ma) with moderately elevated 6/8 and 7/5	49.0506	0.728	0.03	0.036	0.0748	0.0028	0.0036	0.97442	13.369	0.643427	0.07073	0.00069	0.00069	-0.26516	554	18	21	465	17	22	948	20	20	n/a	n/a	n/a	n/a	1048	29	2.76718	1048	29
MINE STOCK CAN	Mine Stock pluton	KR-4	PHASE IId	DEC4	MS-A-23-a - 2	8.8056	20	a = 1/4 of analysis in first 1/2 has good stable 207/206 signal (1938 Ma) with moderately elevated 6/8 and 7/5	48.8132	2.59	0.11	0.13	0.1581	0.0066	0.0081	0.95749	6.32511	0.324057	0.1189	0.0015	0.0015	-0.011886	1296	33	39	946	37	46	1938	22	22	n/a	n/a	n/a	n/a	2007	30	1.49477	2007	30
MAC-197-B	Cirque Lake pluton	KR-3	PHASE IId	DEC4	197B-C-22 - 1	10.8	24	entire signal is ~1700-1800 but irregular, best part is last 1/3 with moderately stable 207/206 signal (1734 Ma) and elevated 6/8 and 7/5	48.6369	2.31	0.17	0.18	0.149	0.01	0.011	0.98112	6.71141	0.495473	0.1123	0.0019	0.0019	-0.31545	1208	54	57	892	56	62	1834	31	31	n/a	n/a	n/a	n/a	1910	29	1.51832	1910	29
KR-03-MS	surface Mine Stock	KR-1	PHASE IId	NOV29	MS-D-16-a - 1	11.022	25	a = last 1/3 of analysis has moderately good 207/206 signal (2544 Ma) with moderately to strongly elelvated 6/8 and 7/5	47.1698	4.91	0.99	1	0.209	0.04	0.042	0.99524	4.78469	0.961516	0.1689	0.0032	0.0038	-0.25584	1710	180	180	1200	220	220	2544	32	38	n/a	n/a	n/a	n/a	2620	38	1.45038	2620	38
MAC-197-A	Cirque Lake pluton	KR-3	PHASE IId	NOV30	197A-D-11-a - 1	13.93	32	a = first 1/3 of analysis has moderately good 207/206 signal (1815 Ma) with moderately elevated 6/8 and 7/5	46.7769	2.17	0.13	0.15	0.1411	0.0081	0.01	0.98044	7.08717	0.50228	0.1111	0.0015	0.0018	-0.19766	1163	43	50	849	46	57	1815	25	29	n/a	n/a	n/a	n/a	1903	30	1.57646	1903	30
MINESTOCKCAN	Mine Stock pluton	KR-4	Phase IIa	APR26	MS-F-7-b - 1	16.791	40	b = first 1/3 of analysis has relatively stable 207/206 signal (2014 Ma) with strongly elevated 6/8 and 7/5	46.6733	2.82	0.45	0.5	0.16	0.025	0.028	0.99501	6.25	1.09375	0.1242	0.0022	0.0022	-0.35672	1280	130	150	940	140	150	2014	31	31	n/a	n/a	n/a	n/a	2141	38	1.77487	2141	38
KR-03-MS	UG Mine Stock	KR-1	PHASE IIb	MAY6	MS-A-12-b	9.9799	23	b = first 1/3 of signal has poor but stable 207/206 signal (1938 Ma) with strongly elevated 6/8 and 7/5	46.4396	2.34	0.27	0.31	0.15	0.019	0.022	0.92976	6.66667	0.977778	0.1199	0.0063	0.0063	0.050305	1240	100	120	900	110	120	1938	92	92	n/a	n/a	n/a	n/a	1921	110	5.72618	1921	110
MAC-197	Cirque Lake pluton	KR-3	PHASE IIb	MAY10	197B-E-23-b	18.711	44	b = middle 1/2 of analysis has poor but stable 207/206 signal (1765 Ma) with strongly elevated but irregular 6/8 and 7/5	45.7224	2.02	0.24	0.26	0.134	0.015	0.016	0.96272	7.46269	0.891067	0.1085	0.0029	0.0029	0.073407	1087	79	86	807	86	93	1765	49	49	n/a	n/a	n/a	n/a	1872	67	3.57906	1872	67
KR-05-215	surface Mine Stock	KR-1	PHASE IId	NOV29	215-A-6-a - 1	12.863	30	a = first 1/3 of analysis has moderately good-poor 207/206 signal (1699 Ma) with elevated 6/8 and 7/6	45.4385	1.85	0.17	0.2	0.1244	0.0093	0.011	0.97695	8.03858	0.710807	0.10424	0.00096	0.0016	-0.30633	1050	60	67	772	63	75	1699	17	28	n/a	n/a	n/a	n/a	1857	48	2.58481	1857	48
03M-220	Ragged pluton	KR-4	PHASE IId	DEC4	220-D-28-c - 1	13.431	30	a (mislabelled KR4-220-D-28-c) = first 1/2 of analysis has moderately stable 207/206 signal @ ~2350 Ma with moderately elevated 6/8 and 7/5, but last 1/3 has moderately stable 207/206 signal (2547 Ma) with more elevated 6/8 and 7/5--hard to decide which segment to use	45.2297	4.6	0.34	0.37	0.196	0.013	0.014	0.9735	5.10204	0.364432	0.1692	0.0029	0.0029	-0.37394	1735	64	68	1152	71	77	2547	29	29	n/a	n/a	n/a	n/a	2625	31	1.18095	2625	31
MINE STOCK CAN	Mine Stock pluton	KR-4	PHASE IId	DEC4	MS-C-7-a - 1	15.336	35	a = last 1/2 of analysis has moderately good stable 207/206 signal (1705 Ma) with moderately elevated 6/8 and 7/5	44.2815	1.8	0.11	0.12	0.1245	0.0077	0.0086	0.97383	8.03213	0.55483	0.1046	0.0015	0.0015	0.16765	1038	37	41	755	44	48	1705	27	27	n/a	n/a	n/a	n/a	1802	35	1.94229	1802	35
SOUTHMAC	Rockslide Mountain pluton	KR-3	Phase IIa	APR19	SM-J-13-b - 1	10.198	24	b = first 1/4 of analysis has relatively stable 207/206 signal (2556 Ma) with strongly elevated 8/6 and 7/5	43.4272	4.4	0.38	0.46	0.188	0.013	0.018	0.95276	5.31915	0.50928	0.1705	0.0053	0.0053	-0.39282	1695	77	93	1110	74	98	2556	56	56	n/a	n/a	n/a	n/a	2625	54	2.05714	2625	54
KR-03-uMSa	underground Mine Stock	KR-4	PHASE IId	DEC4	uMSa-A-23-a - 1	17.82	41	a = first 1/2 of analysis has very good stable 207/206 signal (1888 Ma) with moderately elevated and stable 6/8 and 7/5 (BEST ANALYSIS)	42.7436	2.126	0.056	0.081	0.1335	0.003	0.005	0.9288	7.49064	0.280548	0.1156	0.0013	0.0013	-0.17125	1156	18	26	807	17	29	1888	21	21	n/a	n/a	n/a	n/a	1977	28	1.41629	1977	28
03M-220	Ragged pluton	KR-4	PHASE IId	DEC4	220-A-19 - 1	7.9063	18	first 1/5 of analysis has relatively good stable 207/206 signal (1444 Ma) with moderately elevated 6/8 and 7/5 but signal is short (7.9s)	41.759	1.225	0.038	0.051	0.098	0.0028	0.0041	0.93215	10.2041	0.426905	0.0909	0.0011	0.0011	-0.093215	812	18	23	603	16	24	1444	22	22	n/a	n/a	n/a	n/a	1550	35	2.25806	1550	35
KR-05-148	Rifle Range pluton	KR-3	Phase IIb	MAY9	148-C-7	10.014	23	first 1/3 of analysis has relatively stable 207/206 signal (1865 Ma) with elevated 6/8 and 7/5	41.3405	2.01	0.18	0.19	0.127	0.011	0.011	0.97806	7.87402	0.682001	0.1143	0.0025	0.0025	-0.28391	1107	68	69	771	62	65	1865	40	40	n/a	n/a	n/a	n/a	1974	37	1.87437	1974	37
KR-03-MS	surface Mine Stock	KR-1	PHASE IId	NOV29	MS-C-22-b - 1	7.5331	17	b = short moderately good 207/206 signal (1919 Ma) at very start of analysis with elevated 6/8 and 7/5	41.1673	2.18	0.39	0.4	0.131	0.022	0.023	0.99156	7.63359	1.34025	0.1178	0.0031	0.0034	-0.47221	1140	130	130	790	130	130	1919	48	53	n/a	n/a	n/a	n/a	2064	47	2.27713	2064	47
KR-03-uMSb	underground Mine Stock	KR-4	PHASE IId	DEC4	uMSb-B-16-a - 1	9.1494	21	a = 1/4 of analysis in first 1/2 has relatively stable 207/206 signal (1671 Ma) with moderately elevated 6/8 and 7/5	40.0359	1.56	0.16	0.17	0.11	0.011	0.011	0.99016	9.09091	0.909091	0.1027	0.0018	0.0018	-0.51955	942	68	71	669	64	67	1671	33	33	n/a	n/a	n/a	n/a	1785	30	1.68067	1785	30
KR-03-uMSa	underground Mine Stock	KR-4	PHASE IIb	MAY10	uMSa-A-30	10.483	25	middle 1/3 of analysis has relatively stable 207/206 signal (2441 Ma) with strongly elevated and relatively stable 6/8 and 7/5	39.8197	3.57	0.19	0.25	0.1628	0.0078	0.011	0.95835	6.14251	0.415034	0.1589	0.0034	0.0034	-0.32457	1539	42	57	972	44	61	2441	36	36	n/a	n/a	n/a	n/a	2531	36	1.42236	2531	36
03M-220	Ragged pluton	KR-4	Phase IIa	APR26	220-G-23 - 1	16.416	38	first 1/3 of analysis has moderately stable 207/206 signal (1055 Ma) with notably elevated 6/8 and 7/5	39.6209	0.684	0.063	0.082	0.0671	0.0058	0.0076	0.97847	14.9031	1.68799	0.0746	0.0012	0.0012	-0.42724	522	39	51	418	35	46	1055	34	34	n/a	n/a	n/a	n/a	1185	62	5.23207	1185	62
MINE STOCK CAN	Mine Stock pluton	KR-4	PHASE IId	DEC4	MS-D-36 - 1	19.621	45	first 2/3 of analysis has relatively stable 207/206 signal (2479 Ma) with moderately to strongly elevated 6/8 and 7/5	39.4514	3.71	0.34	0.35	0.165	0.013	0.014	0.98269	6.06061	0.514233	0.1626	0.003	0.003	-0.38953	1550	64	67	978	71	76	2479	30	30	n/a	n/a	n/a	n/a	2572	30	1.16641	2572	30
MINE STOCK CAN	underground Mine Stock	KR-4	PHASE IIb	MAY10	MS-D-12	12.556	29	middle 1/2 of analysis has moderately-poorly stable 207/206 signal (2525 Ma) with strongly elevated 6/8 and 7/5	37.9802	3.73	0.36	0.4	0.161	0.014	0.016	0.96492	6.21118	0.61726	0.1672	0.0041	0.0041	-0.14655	1556	83	92	959	80	90	2525	42	42	n/a	n/a	n/a	n/a	2628	48	1.82648	2628	48
03M-207	UG Mine Stock	KR-1	PHASE IIb	MAY6	207-D-14-c	7.2639	17	c = first 1/5 of analysis has relatively stable 207/206 signal (2016 Ma) with elevated 6/8 and 7/5	36.5575	2.08	0.15	0.21	0.1212	0.0092	0.012	0.94865	8.25083	0.816913	0.1243	0.003	0.003	0.07239	1136	55	75	737	54	72	2016	42	42	n/a	n/a	n/a	n/a	2135	63	2.95082	2135	63
SOUTH MAC	Rockslide Mountain pluton	KR-3	PHASE IId	NOV30	SM-E-2 - 1	18.176	42	first 1/2 of analysis has good stable 207/206 signal (1675 Ma) with moderately elevated 6/8 and 7/5	36.5373	1.42	0.06	0.078	0.0996	0.0038	0.0057	0.98926	10.0402	0.574588	0.10287	0.00073	0.0011	-0.1423	894	25	32	612	22	33	1675	13	20	n/a	n/a	n/a	n/a	1815	25	1.37741	1815	25
MAC-177a	Cirque Lake pluton	KR-4	PHASE IId	DEC4	177-A-9-a - 1	13.766	31	a = last 1/2 of analysis has good stable 207/206 signal (1610 Ma) with somewhat to moderately elevated 6/8 and 7/5, and background Pb204	36.1491	1.31	0.14	0.14	0.0949	0.0098	0.01	0.98813	10.5374	1.11037	0.0994	0.0017	0.0017	-0.23091	834	63	65	582	58	60	1610	31	31	n/a	n/a	n/a	n/a	1761	40	2.27144	1761	40
LEN-1	Lened pluton	KR-4	PHASE IId	DEC4	LEN-G-6 - 1	17.049	39	first 1/2 of analysis has relatively good 20/206 signal (1764 Ma) with moderately elevated but irregular 6/8 and 7/5	35.941	1.543	0.083	0.093	0.1034	0.005	0.0059	0.97728	9.67118	0.551837	0.108	0.0013	0.0013	-0.36022	943	32	35	634	29	34	1764	21	21	n/a	n/a	n/a	n/a	1898	27	1.42255	1898	27
KR-05-148	Rifle Range pluton	KR-3	PHASE IId	NOV30	148--E-14 - 1	12.963	29	first 1/3 of analysis has moderately good stable 207/206 signal (1828 Ma) with moderately elevated 6/8 and 7/5, and 204 just barely above background	35.6674	1.621	0.086	0.1	0.1065	0.0045	0.0064	0.98709	9.38967	0.564262	0.1118	0.0013	0.0016	-0.37238	974	35	42	652	26	37	1828	21	26	n/a	n/a	n/a	n/a	1930	22	1.1399	1930	22
03M-220	Ragged pluton	KR-4	PHASE IIb	MAY10	220-F-31-b	12.582	30	b = first 1/2 of analysis has relatively stable 207/206 signal (1751 Ma) with elevated but irregular 6/8 and 7/5	34.3232	1.46	0.17	0.19	0.098	0.011	0.012	0.98478	10.2041	1.24948	0.1074	0.0023	0.0023	-0.11329	895	69	75	601	65	71	1751	39	39	n/a	n/a	n/a	n/a	1906	47	2.4659	1906	47
MINE STOCK CAN	Mine Stock pluton	KR-4	PHASE IId	DEC4	MS-A-18-a - 1	10.477	24	a = entire analysis is old, but last 1/4 has good stable 207/206 signal (1906 Ma) with moderately elevated 6/8 and 7/5, and Pb204 maybe a smidge above background	34.0504	1.719	0.08	0.093	0.106	0.0049	0.0059	0.95585	9.43396	0.525098	0.1168	0.0013	0.0013	-0.095954	1013	31	36	649	29	34	1906	21	21	n/a	n/a	n/a	n/a	2053	36	1.75353	2053	36
KR-03-uMSa	underground Mine Stock	KR-4	PHASE IIb	MAY10	uMSa-A-24-b	11.12	26	b = first 1/3 of analysis has poor 207/206 signal (1842 Ma) with moderately elevated 6/8 and 7/5	33.279	1.56	0.14	0.16	0.1	0.0079	0.0092	0.96798	10	0.92	0.113	0.0031	0.0031	-0.52746	945	60	68	613	46	54	1842	52	52	n/a	n/a	n/a	n/a	1991	50	2.5113	1991	50
SOUTH MAC	Rockslide Mountain pluton	KR-3	PHASE IId	NOV30	SM-D-5 - 1	19.86	45	middle 1/2 of analysis has moderately stable 207/206 signal (1517 Ma) with moderately elevated but irregular 6/8 and 7/5	32.6302	0.851	0.044	0.053	0.0798	0.0039	0.0052	0.97396	12.5313	0.816578	0.0946	0.0011	0.0014	-0.21286	622	25	30	495	23	31	1517	22	27	n/a	n/a	n/a	n/a	1248	40	3.20513	1248	40
KR-03-CS	Circular Stock	KR-1	PHASE IId	NOV29	CS-I-22-b - 1	12.491	28	b = middle 1/3 of analysis has moderately poor 207/206 signal (1639 Ma) with elevated 6/8 and 7/5	32.4588	1.204	0.065	0.087	0.0861	0.0041	0.0059	0.97298	11.6144	0.795877	0.1009	0.0015	0.0019	-0.37619	799	30	39	532	24	35	1639	27	36	n/a	n/a	n/a	n/a	1810	37	2.0442	1810	37
KR-03-uMSa	underground Mine Stock	KR-4	PHASE IIb	MAY10	uMSa-A-8	9.9788	23	entire analysis is old but irregular, but first 1/3 has most stable but moderately poor 207/206 signal (1276 Ma) with moderately elevated 6/8 and 7/5	31.5047	0.742	0.044	0.056	0.0645	0.004	0.0051	0.91933	15.5039	1.22589	0.0835	0.0021	0.0021	0.29239	562	26	33	402	24	31	1276	52	52	n/a	n/a	n/a	n/a	1477	81	5.48409	1477	81
SOUTHMAC	Rockslide Mountain pluton	KR-3	Phase IIb	MAY9	SM-A-21	9.0133	21	last 1/3 of analysis has moderate 207/206 signal (2267 Ma) with elevated 6/8 and 7/6 (signal too short: 9.0s); most of analysis is old (2.0-2.5 Ga, but irregular)	31.4513	2.33	0.31	0.32	0.118	0.016	0.016	0.97027	8.47458	1.14909	0.1438	0.0046	0.0046	-0.044612	1197	99	100	713	91	93	2267	57	57	n/a	n/a	n/a	n/a	2397	66	2.75344	2397	66
MINESTOCKCAN	Mine Stock pluton	KR-4	Phase IIa	APR26	MS-F-30 - 1	8.7322	20	1/5 of analysis in first 1/4 has poorly stable 207/206 signal (1831 Ma) with notably elevated 6/8 and 7/5	30.7482	1.41	0.2	0.23	0.092	0.012	0.013	0.9715	10.8696	1.53592	0.1124	0.004	0.004	-0.32994	874	88	100	563	69	80	1831	67	67	n/a	n/a	n/a	n/a	1976	75	3.79555	1976	75
SOUTH MAC	Rockslide Mountain pluton	KR-3	PHASE IId	NOV30	SM-C-4 - 1	12.387	29	1/3 of analysis in first 1/2 has moderately stable 207/206 signal (1752 Ma) with moderately elevated and stable 6/8 and 7/5, with 204 above background	30.6564	1.283	0.029	0.054	0.0869	0.0016	0.004	0.88088	11.5075	0.529688	0.1073	0.0012	0.0015	0.20256	838	13	25	537.1	9.8	24	1752	21	26	n/a	n/a	n/a	n/a	1917	49	2.55608	1917	49
SOUTHMAC	Rockslide Mountain pluton	KR-3	Phase IIa	APR19	SM-G-26 - 1	12.475	29	middle 1/3 of analysis has poorly defined 207/206 signal (1480 Ma) with notably elevated 8/6 and 7/5	29.8649	0.95	0.12	0.13	0.0711	0.0071	0.0084	0.95316	14.0647	1.66165	0.0934	0.0039	0.0039	-0.56549	662	65	72	442	43	51	1480	78	78	n/a	n/a	n/a	n/a	1770	86	4.85876	1770	86
03M-220	Ragged pluton	KR-4	PHASE IIb	MAY10	220-G-8	7.7876	18	middle 1/4 of analysis has moderately-poorly stable 207/206 signal (1621 Ma) with elevated 6/8 and 7/5	28.6243	1.05	0.21	0.21	0.075	0.015	0.015	0.98133	13.3333	2.66667	0.1003	0.0041	0.0041	-0.17253	700	110	110	464	88	90	1621	78	78	n/a	n/a	n/a	n/a	1850	100	5.40541	1850	100
SOUTH MAC	Rockslide Mountain pluton	KR-4	PHASE IId	DEC4	SM-A-22-b - 1	15.821	36	b = entire analysis has very poor to moderately stable signal @ ~1800 Ma, but last 1/2 of analysis has moderately stable 207/206 signal (1781 Ma) with somewhat to moderately elevated 6/8 and 7/5, and background Pb204	28.5794	1.24	0.07	0.078	0.0822	0.0044	0.005	0.94786	12.1654	0.739991	0.1092	0.0022	0.0022	-0.16634	814	33	37	509	26	30	1781	37	37	n/a	n/a	n/a	n/a	1974	44	2.22898	1974	44
MAC-177a	Cirque Lake pluton	KR-3	PHASE IId	NOV30	177-E-29-a - 1	7.4675	17	a = 1/5 of analysis in middle has moderately-poor stable 207/206 signal (1257 Ma) with moderately elevated and stable 6/8 and 7/5, but 204 is slightly above background	27.5259	0.635	0.021	0.031	0.0552	0.0019	0.003	0.87007	18.1159	0.984562	0.0826	0.0015	0.0017	0.25086	499	13	19	346	11	18	1257	36	39	n/a	n/a	n/a	n/a	1534	75	4.88918	1534	75
KR-03-MS	UG Mine Stock	KR-1	PHASE IIb	MAY6	MS-A-1	18.986	45	last 2/3 of analysis has moderately-poorly stable 207/206 signal (1107 Ma) with slightly elevated 6/8 and 7/5	27.4616	0.516	0.027	0.044	0.0483	0.0018	0.0037	0.69365	20.7039	1.58602	0.0764	0.0026	0.0026	-0.00067036	421	18	30	304	11	23	1107	61	61	n/a	n/a	n/a	n/a	1418	170	11.9887
MINE STOCK CAN	Mine Stock pluton	KR-4	PHASE IId	DEC4	MS-A-26 - 1	12.927	30	first 1/3 of analysis has moderately stable 207/206 signal (1528 Ma) with somewhat to moderately elevated 6/8 and 7/5	27.2906	0.874	0.039	0.046	0.0668	0.0028	0.0034	0.94646	14.9701	0.761949	0.0952	0.0015	0.0015	0.16822	636	21	25	417	17	21	1528	29	29	n/a	n/a	n/a	n/a	1747	42	2.40412	1747	42
KR-03-CS	Circular Stock	KR-1	PHASE IIb	MAY6	CS-F-21	10.008	23	first 1/3 of analysis has very poor 207/206 signal (2210 Ma) with elevated 6/8 and 7/5	27.1493	2.02	0.54	0.56	0.099	0.022	0.023	0.98151	10.101	2.3467	0.1404	0.0093	0.0093	-0.79447	1040	170	180	600	130	130	2210	120	120	n/a	n/a	n/a	n/a	2494	95	3.80914	2494	95
KR-03-CS	Circular Stock	KR-1	PHASE IId	NOV29	CS-D-5-b - 1	18.832	44	b = moderately good stable 207/206 signal (1563 Ma) with elevated 6/8 and 7/5	26.4235	0.887	0.025	0.049	0.0661	0.0018	0.0037	0.91325	15.1286	0.846835	0.0967	0.0011	0.0016	0.14743	647	12	24	413	11	23	1563	22	33	n/a	n/a	n/a	n/a	1804	57	3.15965	1804	57
KR-03-MS	surface Mine Stock	KR-1	PHASE IId	NOV29	MS-C-14-b - 1	19.753	45	b = first 1/2 of analysis has moderately poor descending 207/206 signal from ~1750-1650 (1699 Ma) with elevated 6/8 and 7/5	26.0153	1.024	0.052	0.071	0.0711	0.0032	0.0047	0.94806	14.0647	0.929734	0.104	0.0016	0.0021	-0.29118	712	26	36	442	19	28	1699	32	40	n/a	n/a	n/a	n/a	1925	51	2.64935	1925	51
MINE STOCK CAN	underground Mine Stock	KR-4	PHASE IIb	MAY10	MS-H-21-b	7.7616	18	b = first 1/4 of analysis has moderately stable 207/206 signal (2654 Ma) with strongly elevated 6/8 and 7/5	25.5087	2.81	0.43	0.45	0.111	0.016	0.017	0.995	9.00901	1.37976	0.1804	0.0037	0.0037	-0.48037	1330	120	130	677	95	99	2654	34	34	n/a	n/a	n/a	n/a	2846	36	1.26493	2846	36
KR-03-uMSb	underground Mine Stock	KR-4	PHASE IIb	MAY10	uMSb-B-18	14.135	33	first 1/2 of signal has poorly stable 207/206 signal (1319 Ma) with moderately elevated 6/8 and 7/5	25.019	0.626	0.063	0.07	0.0526	0.0046	0.0052	0.97135	19.0114	1.87946	0.0855	0.0021	0.0021	-0.47281	488	38	42	330	28	32	1319	51	51	n/a	n/a	n/a	n/a	1633	66	4.04164	1633	66
MINE STOCK CAN	underground Mine Stock	KR-4	PHASE IIb	MAY10	MS-E-33-b	6.9013	16	first 1/4 of analysis has moderately stable 207/206 signal (1826 Ma) with elevated 6/8 and 7/5	24.9179	1.14	0.14	0.15	0.0733	0.0095	0.01	0.96971	13.6426	1.8612	0.1118	0.0027	0.0027	-0.03609	764	74	79	455	57	61	1826	43	43	n/a	n/a	n/a	n/a	2069	88	4.25326	2069	88
SOUTHMAC	Rockslide Mountain pluton	KR-3	Phase IIb	MAY9	SM-D-12-b	13.548	32	b = middle 1/2 of analysis has very poor 207/206 signal (1100 Ma) with elevated to strongly elevated 6/8 and 7/5	24.6364	0.48	0.1	0.1	0.0431	0.008	0.0081	0.96373	23.2019	4.36044	0.0773	0.004	0.004	-0.60068	379	65	65	271	49	50	1100	100	100	n/a	n/a	n/a	n/a	1582	160	10.1138
SOUTH MAC	Rockslide Mountain pluton	KR-4	PHASE IId	DEC4	SM-A-21-b - 1	8.0485	19	b = entire analysis is old and 207/206 signal climbs throughout, but first 1/4 of analysis has relatively stable 207/206 signal (1481 Ma) with somewhat elevated 6/8 and 7/5, and background Pb204	24.2404	0.733	0.067	0.07	0.0573	0.0047	0.0051	0.98978	17.452	1.55332	0.0928	0.0014	0.0014	-0.39768	555	41	43	359	29	31	1481	29	29	n/a	n/a	n/a	n/a	1756	42	2.3918	1756	42
MINE STOCK CAN	Mine Stock pluton	KR-4	PHASE IId	DEC4	MS-D-23 - 1	10.254	23	first 1/4 of analysis has moderately stable 207/206 signal (1237 Ma) with somewhat elevated 6/8, 7/5, and Pb204, and last 1/2 of analysis has moderately stable signal at ~1525 Ma	22.9588	0.506	0.021	0.025	0.045	0.002	0.0024	0.91118	22.2222	1.18518	0.0817	0.0014	0.0014	0.17771	415	14	17	284	12	15	1237	33	33	n/a	n/a	n/a	n/a	1580	73	4.62025	1580	73
03M-220	Ragged pluton	KR-4	PHASE IId	DEC4	220-F-31-a - 1	22.965	53	a = first 2/3 of analysis has moderate-poor 207/206 signal (1664 Ma) with slightly elevated 6/8 and 7/5	22.9567	0.872	0.071	0.075	0.0612	0.0047	0.005	0.98415	16.3399	1.33496	0.1024	0.0013	0.0013	-0.33814	627	39	41	382	28	31	1664	23	23	n/a	n/a	n/a	n/a	1958	44	2.24719	1958	44
KR-05-208	Little Hyland	KR-1	PHASE IId	NOV28	208-D-15-a - 1	16.033	36	a = first 1/2 of analysis has moderately poor 207/206 peak (1822 Ma)with moderately elevated 6/8 and 7/5	22.8321	1.016	0.087	0.095	0.0669	0.0059	0.0064	0.97439	14.9477	1.42997	0.1116	0.0021	0.0021	-0.11622	703	46	50	416	36	39	1822	34	34	n/a	n/a	n/a	n/a	2053	62	3.01997	2053	62
SOUTH MAC	Rockslide Mountain pluton	KR-3	PHASE IId	NOV30	SM-E-12 - 1	8.0276	19	first 1/4 of analysis has good stable 207/206 signal (1294 Ma)with moderately elevated but stable 6/8 and 7/5	22.4111	0.53	0.026	0.032	0.0461	0.002	0.0028	0.95612	21.692	1.31752	0.08413	0.00086	0.0011	-0.3836	431	17	21	290	12	17	1294	20	26	n/a	n/a	n/a	n/a	1619	62	3.82952	1619	62
SOUTH MAC	Rockslide Mountain pluton	KR-3	PHASE IId	NOV30	SM-A-2 - 1	22.516	51	middle 1/2 of analysis has moderately stable 207/206 signal (3052 Ma) with moderately elevated 6/8 and 7/5, and slightly elevated 204	22.2477	3.58	0.27	0.3	0.1114	0.0073	0.0087	0.99073	8.97666	0.70105	0.2304	0.003	0.0035	-0.64403	1523	61	67	679	43	51	3052	21	24	n/a	n/a	n/a	n/a	3242	22	0.678593	3242	22
MINE STOCK CAN	Mine Stock pluton	KR-4	PHASE IId	DEC4	MS-G-13 - 1	16.991	39	last 1/2 of analysis has good stable 207/206 signal (1589 Ma) with somewhat elevated 6/8 and 7/5	21.2712	0.729	0.027	0.033	0.0538	0.0019	0.0025	0.96694	18.5874	0.863725	0.09823	0.00086	0.00086	-0.10761	555	16	20	338	11	15	1589	16	16	n/a	n/a	n/a	n/a	1909	42	2.2001	1909	42
03M-220	Ragged pluton	KR-2	PHASE IId	NOV29	220-E-14 - 1	14.304	33	moderately good-poor 207/206 signal (1850 Ma) with elevated 6/8 and 7/5	21.0811	0.976	0.047	0.066	0.0623	0.0025	0.004	0.95817	16.0514	1.03059	0.1133	0.0015	0.002	-0.40514	689	24	34	390	15	24	1850	23	32	n/a	n/a	n/a	n/a	2143	48	2.23985	2143	48
SOUTH MAC	Rockslide Mountain pluton	KR-3	PHASE IId	NOV30	SM-K-19-a - 1	28.976	67	a = entire analysis has moderately stable 207/206 signal (2203 Ma) with moderately elevated 6/8 and 7/5	20.926	1.42	0.076	0.091	0.0743	0.0038	0.005	0.98708	13.4589	0.905717	0.1382	0.0012	0.0016	-0.43226	889	33	39	461	23	30	2203	15	20	n/a	n/a	n/a	n/a	2458	38	1.54597	2458	38
MAC-197-B	Cirque Lake pluton	KR-3	PHASE IId	DEC4	197B-C-15-a - 1	17.791	40	a = first 1/2 of analysis has moderately stable (humped) 207/206 signal (1410 Ma) with elevated and humped 6/8 and 7/5, and Pb204 barely above background	20.2128	0.558	0.033	0.037	0.0452	0.0021	0.0025	0.97161	22.1239	1.22367	0.0895	0.0014	0.0014	-0.66555	448	22	24	285	13	16	1410	31	31	n/a	n/a	n/a	n/a	1797	45	2.50417	1797	45
MINE STOCK CAN	Mine Stock pluton	KR-4	PHASE IId	DEC4	MS-F-19 - 1	7.2875	16	middle 1/5 of analysis has moderately-poorly stable 207/206 signal (1595 Ma) with somewhat elevated 6/8 and 7/5	20.1693	0.697	0.03	0.035	0.0512	0.0015	0.0022	0.60302	19.5312	0.839233	0.0988	0.0034	0.0034	0.096863	537	18	21	321.7	9.4	13	1595	64	64	n/a	n/a	n/a	n/a	1944	100	5.14403	1944	100
SOUTHMAC	Rockslide Mountain pluton	KR-3	Phase IIa	APR19	SM-K-14-a - 1	10.217	24	a = 2nd 1/4 has relatively stable 207/206 signal (2401 Ma) with notably elevated 8/6 and 7/5	19.7418	1.66	0.25	0.27	0.077	0.011	0.012	0.98431	12.987	2.02395	0.1556	0.0054	0.0054	-0.45541	970	110	110	474	66	72	2401	61	61	n/a	n/a	n/a	n/a	2665	68	2.55159	2665	68
KR-05-148	Rifle Range pluton	KR-2	PHASE IId	NOV29	148-D-34-b - 1	17.746	41	b = entire analysis has moderately poor to moderately good 207/206 signal ~2600 Ma with elevated 6/8, 7/5 and 204, but last 1/2 has moderately good 207/206 signal (2727 Ma) with the highest 6/8 and 7/5, and 204 just above background	19.582	2.241	0.078	0.13	0.0865	0.0029	0.0052	0.96117	11.5607	0.694978	0.1884	0.0019	0.003	-0.11391	1191	24	41	534	17	31	2727	17	26	n/a	n/a	n/a	n/a	2949	39	1.32248	2949	39
LEN-1	Lened pluton	KR-4	PHASE IId	DEC4	LEN-E-13 - 1	10.323	24	1/3 of analysis in first 1/2 has relatively stable 207/206 signal (1627 Ma) with somewhat elevated 6/8 and 7/5	17.7013	0.634	0.037	0.041	0.0457	0.0024	0.0028	0.98202	21.8818	1.34068	0.1003	0.0014	0.0014	-0.30067	497	22	24	288	15	17	1627	26	26	n/a	n/a	n/a	n/a	2049	50	2.44021	2049	50
KR-05-148	Rifle Range pluton	KR-2	PHASE IId	NOV30	148-D-27 - 1	11.577	27	second 1/2 of analysis has moderately poor 207/206 signal (1342 Ma) with slightly elevated 6/8 and 7/6	17.4367	0.444	0.048	0.051	0.037	0.0034	0.0037	0.96161	27.027	2.7027	0.0867	0.0031	0.0032	-0.53923	369	34	35	234	21	23	1342	73	75	n/a	n/a	n/a	n/a	1875	100	5.33333	1875	100
KR-03-uMSa	underground Mine Stock	KR-4	PHASE IIb	MAY10	uMSa-B-38-b	12.435	29	b = 1/3 of analysis in first half has very poor 207/206 signal (1429 Ma) with moderately elevated 6/8 and 7/5	17.1449	0.491	0.046	0.052	0.0387	0.0026	0.0032	0.90605	25.8398	2.13662	0.0911	0.0042	0.0042	-0.60534	402	32	36	245	16	20	1429	91	91	n/a	n/a	n/a	n/a	1969	110	5.58659	1969	110
MAC-197	Cirque Lake pluton	KR-3	PHASE IIb	MAY10	197B-A-24	7.8711	18	1/4 of analysis near beginning has poor 207-206 signal (1121 Ma) with slightly elevated 6/8 and 7/5	17.1276	0.324	0.029	0.033	0.0302	0.0028	0.0031	0.93426	33.1126	3.39897	0.0773	0.0026	0.0026	0.083513	284	22	25	192	17	19	1121	67	67	n/a	n/a	n/a	n/a	1797	190	10.5732
MAC-177a	Cirque Lake pluton	KR-3	PHASE IId	NOV30	177-A-25-a - 1	23.568	55	a = first 2/3 of analysis has moderately poor 207/206 signal (1508 Ma) with slightly elevated 6/8, 7/5 and 204	16.9761	0.537	0.072	0.074	0.0407	0.0052	0.0055	0.99439	24.57	3.32027	0.0943	0.0016	0.0018	-0.19356	423	43	44	256	32	33	1508	32	36	n/a	n/a	n/a	n/a	2019	110	5.44824	2019	110
KR-05-110	Cac pluton	KR-2	PHASE IIb	MAY6	110-C-16	8.4733	20	first 1/4 of analysis has poor 207/206 signal (1931 Ma) with slightly elevated 6/8 and 7/5	16.8824	0.87	0.1	0.12	0.0519	0.0045	0.0057	0.92525	19.2678	2.11612	0.1194	0.0063	0.0063	-0.49744	626	56	65	326	28	35	1931	97	97	n/a	n/a	n/a	n/a	2364	110	4.65313	2364	110
KR-05-148	Rifle Range pluton	KR-2	PHASE IIb	MAY6	148-A-31	8.0232	19	first 1/4 of analysis has moderately-poorly stable 207/206 signal (2314 Ma) with somewhat elevated but irregular 6/8 and 7/5	15.6007	1.18	0.14	0.17	0.0576	0.0061	0.0073	0.94757	17.3611	2.20028	0.1478	0.0055	0.0055	-0.17216	782	67	77	361	37	44	2314	61	61	n/a	n/a	n/a	n/a	2691	96	3.56745	2691	96
MINE STOCK CAN	Mine Stock pluton	KR-4	PHASE IId	DEC4	MS-B-5 - 1	13.978	33	middle 1/2 of analysis has moderate-poorly stable 207/206 signal (1555 Ma) with barely elevated 6/8 and 7/5	15.0161	0.493	0.025	0.028	0.0369	0.0014	0.0018	0.90236	27.1003	1.32196	0.0966	0.0022	0.0022	-0.37103	406	17	19	233.5	8.8	11	1555	41	41	n/a	n/a	n/a	n/a	2129	78	3.66369	2129	78
MINE STOCK CAN	Mine Stock pluton	KR-4	PHASE IId	DEC4	MS-F-9 - 1	13.878	32	entire analysis is old, but only relatively stable segment is middle 1/3 (2754 Ma) with somewhat to moderately elevated 6/8, 7/5, and Pb204	14.459	1.684	0.033	0.056	0.0637	0.0012	0.0023	0.79455	15.6986	0.566825	0.1916	0.0025	0.0025	0.26031	1006	11	19	398.2	7.3	14	2754	21	21	n/a	n/a	n/a	n/a	3096	51	1.64729	3096	51
MAC-177a	Cirque Lake pluton	KR-3	Phase IIb	MAY9	177-B-31-a	10.146	23	a = first 1/3 of analysis has very poor 207/206 signal (2462 Ma) with somewhat elevated 6/8 and 7/5	14.3786	1.24	0.21	0.22	0.057	0.011	0.011	0.98193	17.5439	3.38566	0.1619	0.0082	0.0082	0.50112	795	89	90	354	68	69	2462	83	83	n/a	n/a	n/a	n/a	2806	140	4.98931	2806	140
KR-05-210	Nahanni Range Road pluton	KR-2	PHASE IId	NOV29	210-A-5 - 1	10.99	25	last 1/3 of analysis has moderately good 207/206 signal (1685 Ma) with slightly elevated 6/8 and 7/5	12.5223	0.474	0.031	0.038	0.0332	0.002	0.0026	0.97823	30.1205	2.35883	0.1035	0.0014	0.0019	-0.39511	393	21	26	211	12	16	1685	25	34	n/a	n/a	n/a	n/a	2388	110	4.60637	2388	110
SOUTH MAC	Rockslide Mountain pluton	KR-3	PHASE IId	NOV30	SM-F-4-a - 1	7.6967	17	a = first 1/5 of analysis has moderately stable 207/206 signal (1529 Ma) with somewhat elevated 6/8 and 7/5 and 204 above background	12.3152	0.386	0.013	0.019	0.02964	0.00082	0.0015	0.9254	33.7382	1.7074	0.0951	0.0014	0.0016	-0.35797	331	9.6	14	188.3	5.2	9.4	1529	28	32	n/a	n/a	n/a	n/a	2324	120	5.16351	2324	120
KR-03-MS	surface Mine Stock	KR-1	PHASE IId	NOV29	MS-B-6-b - 1	9.9782	23	b = third 1/4 has moderately good stable 207/206 signal (1965 Ma) with elevated 6/8 and 7/5	9.10941	0.471	0.016	0.027	0.02816	0.0009	0.0017	0.86586	35.5114	2.1438	0.1207	0.0021	0.0025	0.1492	391	11	19	179	5.6	10	1965	30	37	n/a	n/a	n/a	n/a	2972	160	5.38358	2972	160
KR-05-148	Rifle Range pluton	KR-2	PHASE IId	NOV30	148-E-32 - 1	17.52	40	first 1/2 of analysis has poor 207/206 signal (3354 Ma) with only slightly elevated 7/5 and 204	3.78652	0.761	0.033	0.042	0.0199	0.00066	0.0011	0.76455	50.2513	2.77771	0.2798	0.008	0.0084	0.16198	578	20	26	127	4.2	6.8	3354	45	47	n/a	n/a	n/a	n/a	5650	490	8.67257	5650	490
Note: Samples with strike-through were filtered and removed from consideration because either: (a) discordance was < -5; (b) the MSDW for Concordia was >2.5; (c) the 2-sigma error on the age was >10%; and/or (d) the "Re-calculated Upper Intercept Age" was not within 50 m.y. of error of "Final Age 207_206".
1 Best Ages that are <1400 Ma are highlighted and corresponding SEM CL images are provided

## Sheet: DR1D_FilteredDetritalCompiled
Notes: compiled data are 207Pb/206Pb ages if >0.9 Ga and 206Pb/238U ages if <0.9 Ga (highlighted yellow) with 2-sigma uncertainties, and have been filtered to include data with (-5% to 10% discordance, and uncertainties that are <10% of the age
ABBREVIATION:	Ma										WSG												PG												Ps								MSG
SOURCE:	Ross, G.M., Villeneuve, M.E., and Theriault, R.J., 2001, Isotopic provenance of the lower Muskwa assemblage (Mesoproterozoic, Rocky Mountains, British Columbia): New clues to correlation and source areas: Precambrian Research, v. 111, p. 57-77, doi: 10.1016/S0301-9268(01)00156-5.										Furlanetto, F., Thorkelson, D.J., Rainbird, R.H., Davis, W.J., Gibson, H.D., and Marshall, D.D., 2016, The Paleoproterozoic Wernecke Supergroup of Yukon, Canada: Relationships to orogeny in northwestern Laurentia and basins in North America, East Australia, and China: Gondwana Research, v. 59, p. 14-40, doi:10.1016/j.gr.2016.06.007.												Medig, K.P.R., Thorkelson, D.J., Turner, E.C., Rainbird, R.H., Gibson, H.D., and Marshall, D.D., 2022 (in press), Mesoproterozoic Basins (Yukon, Canada) in the Evolution of Supercontinent Columbia: Canadian Journal of Earth Sciences, v. 00, p. 1-62, doi:10.1139/cjes-2022-0055.												Pigage, L.C., 2009, Bedrock geology of NTS 95C/5 (Pool Creek) and NTS 95D/8 map sheets, southeast Yukon: Yukon Geological Survey Bulletin 16, 150 p.								Rainbird, R.H., Rayner, N.M., Hadlari, T., Heaman, L.M., Ielpi, A., Turner, E.C., and MacNaughton, R.B., 2017, Zircon provenance data record the lateral extent of pancontinental, early Neoproterozoic rivers and erosional unroofing history of the Grenville orogen: GSA Bulletin, v. 129, p. 1408-1423, doi:10.1130/B31695.1.
SAMPLE ID (original "n")	RAR-JR-2 (n=25/25)		RAR-GRQ-2 (n=31/34)		RAR-GRQ-5 (n=29/33)		RAR-TUC (n=18/17?)		ALL Muskwa assemblage		FF-07-1-4-1 (n=64/76)		DT-06-3-5-1B (n=39/53)		DT-02-3-5-1B (n=70/75)		FF-07-4-1-1 (n=49/66)		FF-07-2-5-1 (n=36/65)		ALL Wernecke Supergroup		KM09-1-4-1C (n=55/77)		KM09-10-3-1C (n=68/82)		KM11-11-1-1C (n=91/100)		KM09-12-2-2C (n=34/47)		KM10-8-1-1C (n=55/74)		ALL Pinguicula Group		04LP027 (n=83/100)		05LP024-1 (n=58/60)		05LP024-2 (n=68/80)		ALL "Ps"		11MWB-28 (n=59/112)		11MWB-29 (n=83/110)		11MWB-30 (n=57/109)		11MWB-31 (n=73/100)
UNIT	Muskwa assemblage, Chischa Fm		Muskwa assemblage, Upper Chischa Fm		Muskwa assemblage, Tetsa Fm		Muskwa assemblage, Tuchodi Fm		Muskwa assemblage, Chischa Fm		Wernecke SG, Fairchild Lake Gp		Wernecke SG, Fairchild Lake Gp		Wernecke SG, Lower Quartet Gp		Wernecke SG, Upper Quartet Gp		Wernecke SG, Lower Gillespie Lake Gp				Pinguicula Gp, Mt Landreville Fm		Pinguicula Gp, Mt Landreville Fm		Pinguicula Gp, Mt Landreville Fm		Pinguicula Gp, Mt Landreville Fm		Pinguicula Gp, Mt Landreville Fm		Pinguicula Gp, Mt Landreville Fm		Ps		Ps		Ps		Ps		Mackenzie Mountains SG, upper Tsezotene Fm		Mackenzie Mountains SG, Katherine Gp, Grafe River Fm (K3)		Mackenzie Mountains SG, Katherine Gp, Shattered Range Fm (K5)		Mackenzie Mountains SG, Katherine Gp, Abraham Plains Fm (K7)
"n" FILTERED	21		25		27		15		88		67		47		73		59		57		303		71		80		97		40		62		350		82		58		62		202		57		83		81		100
AGE (Era +/- Period, or Period +/- Epoch or informal position)	Mesoproterozoic		Mesoproterozoic		Mesoproterozoic		Mesoproterozoic		Mesoproterozoic		Mesoproterozoic		Mesoproterozoic		Mesoproterozoic		Mesoproterozoic		Mesoproterozoic		Mesoproterozoic		Mesoproterozoic		Mesoproterozoic		Mesoproterozoic		Mesoproterozoic		Mesoproterozoic		Mesoproterozoic		unknown (>650 Ma)		unknown (>650 Ma)		unknown (>650 Ma)		unknown (>650 Ma)		Neoproterozoic, Tonian		Neoproterozoic, Tonian		Neoproterozoic, Tonian		Neoproterozoic, Tonian
REGION	SW Liard area, northeast BC		SW Liard area, northeast BC		SW Liard area, northeast BC		SW Liard area, northeast BC		SW Liard area, northeast BC		Wernecke Inlier, east Yukon		Richardson Mtns, northeast Yukon		Wernecke Inlier, east Yukon		Wernecke Inlier, east Yukon		Wernecke Inlier, east Yukon		Wernecke Inlier, Richardson Mtns		Wernecke Inlier, Wernecke Mtns, east Yukon		Wernecke Inlier, Wernecke Mtns, east Yukon		Wernecke Inlier, Wernecke Mtns, east Yukon		Wernecke Inlier, Wernecke Mtns, east Yukon		Hart River Inlier, central Yukon		Wernecke Inlier, Hart River Inlier		NW Liard area, southeast Yukon		NW Liard area, southeast Yukon		NW Liard area, southeast Yukon		NW Liard area		eastern Mackenzie Mtns, west NWT		eastern Mackenzie Mtns, west NWT		eastern Mackenzie Mtns, west NWT		eastern Mackenzie Mtns, west NWT
PROVENANCE	Cratonic										Cratonic												Cratonic + Exotic or southern US												Cratonic								Grenvillian
DESCRIPTION	"sandstone"		"sandstone"		"sandstone"		"sandstone"		"sandstone"		"Greenish-grey fine sandstone"		"Quartzite"		"Quartzite with X lams and shaley partings"		"Sandstone"		"Grey-orange weath carb siltstone to very fine sandstone"				"sandstone", above bleached Wernecke SG regolith		"sandstone", base not exposed		"sandstone", base not exposed		"sandstone", base not exposed		"sandstone", above Hart River Sills				"hornfelsed siliciclastic siltstones and sandstones with minor conglomerate and calc-silicate rock exposed on one ridge in the Pool Creek map sheet"		"hornfelsed siliciclastic siltstones and sandstones with minor conglomerate and calc-silicate rock exposed on one ridge in the Pool Creek map sheet"		"hornfelsed siliciclastic siltstones and sandstones with minor conglomerate and calc-silicate rock exposed on one ridge in the Pool Creek map sheet"		"hornfelsed siliciclastic siltstones and sandstones with minor conglomerate and calc-silicate rock exposed on one ridge in the Pool Creek map sheet"		"very fine- to fine-grained, trough cross-bedded quartzarenite from the uppermost part of Tsezotene Formation, just below its transition to the overlying, sandstone-dominated Eduni Formation"		"very fine- to fine-grained, trough cross-bedded subarkose from the uppermost Grafe River Formation"		"fine-grained, well cemented, trough cross-bedded subarkose"		"fine to coarse-grained, trough cross-bedded quartzarenite"
	2702.03	21.66	1819.6	115.62	2721.6	89.38	2141.29	15.9	2702.03	21.66	1656	68	1885	70	1814	35	1602	92	1622	60	1656	68	1838	38	1467	22	3002	12	1613	54	1840	52	1838	38	1907	80	2695.2	24.12	2669.5	54.72	1907	80	1054.5	31.5373	1068.06	20.0659	989.642	15.1492	1006.69
	2655.99	8.6	1833.9	159.54	2799.3	57.9	1768.59	18.46	2655.99	8.6	1656	84	1900	52	1823	19	1609	35	1663	42	1656	84	2330	28	1900	34	1856	38	1889	14	1830	44	2330	28	1909	26	1818.2	21.6	1709.6	90.96	1909	26	1073.05	27.5006	1074.24	20.2124	1002.81	15.4121	1013.42
	2712.18	18.14	1946.5	135.26	1841.8	108.2	2553.8	9.42	2712.18	18.14	1666	23	1914	21	1834	44	1620	40	1707	123	1666	23	1927	16	1728	60	1861	30	1780	16	1814	40	1927	16	1911	102	2521.3	21.8	1815.6	63.5	1911	102	1078.8	27.5028	1074.5	20.5713	1045.13	15.9293	1020.59
	3075.45	11.56	2710.9	43.26	2668.3	74.6	1880.07	12.62	3075.45	11.56	1766	117	1921	53	1845	37	1633	81	1715	29	1766	117	1908	22	1767	46	1875	24	2581	14	1838	26	1908	22	1922	50	2681.3	29.82	2435	47.36	1922	50	1079.76	27.3964	1085.29	20.0818	1063.24	13.3112	1021.31
	1841.29	25.72	2067.2	190.06	2694.2	78.32	1830.36	30.04	1841.29	25.72	1850	24	1927	55	1857	22	1634	64	1762	19	1850	24	1936	90	1703	24	1900	26	1670	32	1829	20	1936	90	1924	66	1862.7	31.18	2449.6	52.84	1924	66	1079.96	29.5311	1086.24	19.9997	1081.26	15.1382	1032.46
	1819.19	11.86	2074.5	77.28	2532	68.66	2193.36	12.92	1819.19	11.86	1851	39	1956	76	1870	26	1640	38	1782	57	1851	39	1627	44	1750	34	2585	18	1849	98	1838	30	1627	44	1925	54	1931.2	39.48	1880.4	137.06	1925	54	1081.27	28.3884	1086.64	21.059	1122.35	13.0884	1037.38
	1861.97	26.44	1801	96.9	1966.7	140.32	1843.25	57.66	1861.97	26.44	1863	20	1986	69	1873	21	1647	55	1808	24	1863	20	1907	20	2631	42	1846	18	2540	10	1887	42	1907	20	1931	64	1767.7	40.2	2772.8	53.42	1931	64	1085.27	30.9976	1086.89	20.3929	1127.04	30.1148	1041.21
	2118	25.06	2566	109.96	1818.2	49.68	1766.28	28.08	2118	25.06	1863	28	1991	13	1881	33	1648	41	1814	28	1863	28	1941	32	1623	20	2496	22	1779	20	1395	28	1941	32	1941	26	2593.8	22.1	1772.6	90.18	1941	26	1086.1	27.0401	1087.6	20.7326	1137.67	14.1928	1058.5
	2715.44	29.74	2581.8	59.56	1872.6	45.42	1866.18	34.62	2715.44	29.74	1877	19	2011	71	1892	18	1659	125	1821	28	1877	19	2594	34	2546	58	1595	30	2688	14	2902	18	2594	34	1943	88	1865.2	38	1845.6	73.5	1943	88	1095.47	27.2236	1091.86	20.504	1145.13	13.1863	1074.63
	1863.37	33.06	2601.4	29.56	1825.9	53.92	2270.34	26.08	1863.37	33.06	1883	27	2097	62	1893	32	1671	40	1824	121	1883	27	1919	16	1656	26	1368	60	1857	28	1395	56	1919	16	1944	50	2559.3	25.66	1811.5	80.88	1944	50	1130.16	26.2142	1093.37	19.7552	1147.54	12.9316	1078.25
	1836.04	38.16	2687.2	60.64	2447.5	21.36	2367.53	13.62	1836.04	38.16	1884	37	2307	23	1897	21	1724	24	1828	22	1884	37	1888	34	1754	30	1608	50	1935	20	1874	30	1888	34	1952	34	1881.7	33.1	1739.9	63.96	1952	34	1135.07	32.4423	1098.75	19.3867	1153.88	13.3103	1083.61
	1862.56	27.16	1843.3	71.42	1840.6	36.52	1751.18	26.48	1862.56	27.16	1890	29	2329	42	1898	96	1739	22	1830	51	1890	29	2192	42	1754	24	1504	30	2539	10	1672	52	2192	42	1956	26	1863.5	30.96	1790.2	58.34	1956	26	1144.29	35.9312	1100.28	20.288	1154.95	15.1097	1108.42
	2330.24	28.9	2467.6	58.64	1838.7	17.08	2342.8	20.12	2330.24	28.9	1894	20	2356	91	1919	30	1745	39	1832	33	1894	20	1734	26	1607	60	1836	24	2693	18	1952	32	1734	26	1957	40	1867.1	35.32	1867.6	47.7	1957	40	1164.84	28.5371	1113.82	31.0681	1163.21	14.3141	1112.53
	1955.01	46.26	1845.4	40.98	1821.6	44.74	2677.21	21.68	1955.01	46.26	1894	15	2394	183	1928	57	1755	24	1836	34	1894	15	1925	26	2037	30	1784	36	2763	30	1514	30	1925	26	1958	26	2873.9	20.3	1777.4	53.38	1958	26	1173.46	32.7997	1116.26	23.568	1169.63	14.385	1119.52
	2065.69	39.1	1874.9	27.2	2075.2	45.62	2690.91	12.22	2065.69	39.1	1902	43	2420	54	1935	110	1756	33	1837	36	1902	43	1867	22	1723	24	2525	16	1924	24	2332	16	1867	22	1959	26	1995.7	28.5	1780.5	62.88	1959	26	1175.75	27.5649	1126.12	21.0829	1178.87	24.8019	1127.79
	1856.87	28.22	1817.3	91.42	1980.6	27.44			1856.87	28.22	1910	18	2445	32	1935	20	1776	38	1845	66	1910	18	1797	30	1971	22	1581	22	1848	20	1913	52	1797	30	1962	26	2687.2	23.1	1749	81.44	1962	26	1191.5	27.6352	1135.52	24.5967	1198.41	13.5385	1131.27
	1915.44	26.88	1855.8	25	1776.8	61.04			1915.44	26.88	1915	20	2447	64	1983	29	1780	18	1847	33	1915	20	1683	18	1729	18	1767	20	1784	28	1558	36	1683	18	1963	26	1858.2	32.68	1769.3	52.52	1963	26	1195.44	27.024	1155.43	19.6851	1201.5	13.5112	1144.77
	1868.81	20.38	2818.8	45.64	1778.6	42.56			1868.81	20.38	1916	12	2447	35	2013	24	1789	34	1848	27	1916	12	1553	64	1131	54	1874	18	1785	38	1705	66	1553	64	1964	26	1860	36.96	1898	52.04	1964	26	1197.35	26.4239	1165.76	30.5588	1201.98	12.8881	1159.22
	1858.25	19.16	1885.6	34.22	1763.5	28.6			1858.25	19.16	1918	20	2448	41	2023	26	1790	19	1855	44	1918	20	2649	38	1587	36	1793	28	1813	12	1794	32	2649	38	1964	26	1840.5	34.86	1782.6	60.98	1964	26	1217.88	26.6436	1173.65	22.8771	1213.7	13.1731	1168.78
	2625.94	13.52	1909	45.88	1760.3	49.56			2625.94	13.52	1922	14	2456	62	2028	21	1791	53	1860	37	1922	14	1683	44	1592	32	2658	16	1786	14	2193	16	1683	44	1965	28	1797.9	38.2	1792.6	54.36	1965	28	1219.82	25.7922	1179.23	23.0695	1215.66	14.3648	1173.97
	2008.31	29.64	1828.6	18.14	2563.4	20.9			2008.31	29.64	1931	22	2468	49	2034	75	1792	14	1870	81	1931	22	1944	26	2521	14	2462	14	1797	40	1854	30	1944	26	1965	28	1850.7	26.36	1767.6	65.44	1965	28	1231.04	26.829	1190.78	21.1553	1217.94	13.1764	1174.16
			1815.5	41.02	1905.2	29.94			1819.6	115.62	1937	21	2478	49	2062	81	1803	30	1872	40	1937	21	2739	34	2576	16	1875	24	2360	40	1367	38	2739	34	1966	26	2655.5	25.82	1784.7	57.9	1966	26	1234.01	26.2157	1195.86	25.3552	1218.04	13.927	1178.54
			2630.6	57.54	2604.3	22.3			1833.9	159.54	1938	16	2484	14	2071	28	1807	23	1879	23	1938	16	1877	32	1886	26	1502	26	2530	18	1404	36	1877	32	1967	28	1785.7	34.48	1812.5	68.16	1967	28	1239.87	26.1536	1207.44	21.5615	1219.02	14.093	1196.46
			1805.3	54.5	2538.6	22.36			1946.5	135.26	1941	14	2507	26	2075	48	1809	20	1902	47	1941	14	1609	26	2678	34	1670	30	2742	12	1379	26	1609	26	1967	26	1933.7	35.38	2669.5	54.72	1967	26	1281.85	26.3894	1219.07	19.3456	1226.39	13.1252	1207.21
			1784.5	38.38	1845	26.2			2710.9	43.26	1944	12	2510	17	2274	82	1812	24	1908	20	1944	12	1621	60	1601	26	1605	32	2641	20	1400	30	1621	60	1968	26	1863.1	28.92	1709.6	90.96	1968	26	1339.09	29.7791	1223.59	21.1489	1248.51	12.5054	1209.2
					1801.9	55.96			2067.2	190.06	1953	16	2512	19	2305	20	1817	42	1908	24	1953	16	1700	20	1681	54	1614	40	1722	22	1901	24	1700	20	1969	66	2674.2	30.16	1815.6	63.5	1969	66	1352.88	26.6277	1226.61	21.3417	1250.81	14.7746	1212.26
					1782.8	51.28			2074.5	77.28	1957	13	2515	28	2312	33	1819	27	1922	25	1957	13	1844	30	1808	30	1641	24	2680	10	1369	28	1844	30	1969	26	2744.5	28.74	2435	47.36	1969	26	1355.63	25.4143	1234.54	20.0138	1251.06	12.8132	1212.9
									1801	96.9	1972	132	2518	21	2313	17	1825	32	1981	23	1972	132	1819	40	1876	18	1878	34	2401	26	1619	22	1819	40	1970	30	1810.8	36.44	2449.6	52.84	1970	30	1366.45	25.3165	1294.77	26.8347	1256.27	13.0895	1221
									2566	109.96	1976	17	2521	67	2337	38	1826	61	2029	20	1976	17	2315	42	2092	32	1775	42	1737	22	1879	34	2315	42	1973	24	1890.8	42.48	1880.4	137.06	1973	24	1410.79	25.3221	1303.57	19.6461	1306.1	14.6802	1277.48
									2581.8	59.56	1987	35	2534	40	2345	25	1831	42	2053	101	1987	35	1814	54	2511	14	2594	18	1424	52	1612	32	1814	54	1973	26	2913.1	40.46	2772.8	53.42	1973	26	1419	25.099	1303.95	19.7144	1339.48	15.0578	1287.04
									2601.4	29.56	1988	16	2552	32	2349	46	1833	33	2061	30	1988	16	1753	34	2724	20	1880	30	1734	24	1498	32	1753	34	1974	26	1863.8	43.14	1772.6	90.18	1974	26	1421.6	26.8592	1310.66	19.4136	1362.52	12.0116	1299.81
									2687.2	60.64	2000	27	2572	20	2349	47	1834	46	2063	50	2000	27	2495	16	1828	26	1762	22	1702	26	1651	38	2495	16	1976	24	1842.3	42.62	1845.6	73.5	1976	24	1423.58	24.8859	1313.65	22.489	1364.49	14.2436	1300.55
									1843.3	71.42	2091	20	2573	54	2349	191	1844	29	2090	16	2091	20	1888	26	1435	22	1841	36	1863	18	2556	14	1888	26	1978	24	1822.7	42.02	1811.5	80.88	1978	24	1425.75	25.1241	1316.61	20.4592	1367.58	13.7343	1307
									2467.6	58.64	2111	77	2592	9	2352	115	1848	13	2107	30	2111	77	1843	60	1454	46	1652	68	1870	20	1822	26	1843	60	1980	26	1829.2	41.96	1739.9	63.96	1980	26	1427.68	27.5357	1319.32	19.9734	1372.06	13.9146	1310.23
									1845.4	40.98	2156	23	2592	76	2415	14	1850	66	2126	17	2156	23	1522	128	1630	24	2699	20	1932	24	2345	28	1522	128	1981	26	1823.1	43.02	1790.2	58.34	1981	26	1430.72	25.0242	1322.41	22.237	1374.49	12.6658	1311.68
									1874.9	27.2	2237	99	2618	36	2419	40	1850	21	2259	19	2237	99	2333	40	1641	38	1926	12	2388	30	1342	54	2333	40	1982	24	1851.7	46.04	1867.6	47.7	1982	24	1431.51	24.8394	1327.91	21.0095	1374.67	15.7059	1328.62
									1817.3	91.42	2271	107	2623	29	2471	25	1854	26	2281	139	2271	107	2506	24	1716	26	1295	72	2448	22	1993	20	2506	24	1982	30	1853.7	42.44	1777.4	53.38	1982	30	1434.65	25.0676	1330.48	21.6039	1375.06	15.2415	1343.79
									1855.8	25	2338	41	2658	36	2473	12	1858	28	2371	22	2338	41	1910	32	1750	22	2001	18	2347	20	1376	46	1910	32	1985	26	1810.5	43.96	1780.5	62.88	1985	26	1436.57	24.8102	1333.59	20.707	1376.85	14.086	1352.07
									2818.8	45.64	2361	13	2678	36	2490	18	1868	54	2372	31	2361	13	1829	100	1769	34	1698	22	2518	14	1846	88	1829	100	1986	30	1838.1	43.18	1749	81.44	1986	30	1438.95	25.3792	1339.88	19.6763	1385.14	13.1774	1361.99
									1885.6	34.22	2377	80	2688	28	2500	16	1870	24	2395	95	2377	80	1834	40	1783	24	1873	22	2561	20	1921	34	1834	40	1994	48	2700.7	38.44	1769.3	52.52	1994	48	1442.49	25.0457	1349.02	19.8424	1389.14	14.4491	1366.25
									1909	45.88	2401	14	2692	32	2501	117	1873	50	2409	22	2401	14	2498	78	1819	26	2363	22		0	2073	22	2498	78	1994	28	2742.4	45.42	1898	52.04	1994	28	1445.71	25.2308	1351.47	19.6531	1425.62	12.9868	1370.05
									1828.6	18.14	2418	60	2727	92	2504	48	1881	18	2415	45	2418	60	2077	24	1820	32	1977	18		0	2500	20	2077	24	1994	24	1841.9	43.04	1782.6	60.98	1994	24	1445.8	28.2827	1356.18	22.768	1427.49	12.1397	1373.21
									1815.5	41.02	2426	13	2731	27	2508	91	1884	40	2445	19	2426	13	1902	20	1849	36	1877	48		0	1422	44	1902	20	1997	24	1825.3	43.9	1792.6	54.36	1997	24	1452.29	26.0219	1357.02	19.6448	1427.86	12.238	1383.61
									2630.6	57.54	2441	87	2746	26	2509	21	1908	38	2468	43	2441	87	1917	22	1856	32	2402	14		0	2732	28	1917	22	2000	32	1894	41.96	1767.6	65.44	2000	32	1464.99	24.8187	1357.52	19.8041	1428.92	12.6782	1399.56
									1805.3	54.5	2484	20	2783	44	2516	34	1909	22	2578	103	2484	20	2401	24	1865	24	1905	26		0	1530	44	2401	24	2000	24	1859	42.76	1784.7	57.9	2000	24	1467.76	25.4553	1358.84	18.9779	1429.11	14.6991	1407.4
									1784.5	38.38	2492	17	2788	66	2519	16	1914	17	2578	33	2492	17	2437	14	1890	24	1586	30		0	1998	68	2437	14	2001	38	1819.1	44.98	1812.5	68.16	2001	38	1473.78	26.1729	1359.59	20.547	1430.55	12.2324	1430.4
									2721.6	89.38	2493	19	2793	28	2525	27	1924	50	2584	24	2493	19	2015	134	1907	28	1780	42		0	2705	16	2015	134	2001	32	1891.1	43.52	1868.8	14.1	2001	32	1484.78	25.1286	1360.78	20.9877	1430.72	12.8301	1433.55
									2799.3	57.9	2501	9			2527	19	2003	62	2647	63	2501	9	1828	30	1952	24	1974	32		0	1819	30	1828	30	2002	24	1838.2	44.04	1960	13.94	2002	24	1623.96	24.5005	1360.86	19.448	1430.75	12.0314	1435.84
									1841.8	108.2	2512	21			2544	77	2032	40	2661	27	2512	21	1911	32	2000	22	1873	26		0	1887	32	1911	32	2003	24	1839.2	47.62	1817.5	15.94	2003	24	1635.48	24.7353	1376.73	22.1274	1433.72	13.1133	1437.33
									2668.3	74.6	2523	17			2558	33	2052	34	2667	16	2523	17	1853	34	2079	44	1905	18		0	1512	38	1853	34	2005	26	1810.9	62.1	1851.6	18.4	2005	26	1794.11	23.6732	1380.93	18.9513	1440.21	12.4298	1438.31
									2694.2	78.32	2532	31			2559	82	2125	17	2677	20	2532	31	1810	28	2277	98	1810	48		0	2615	14	1810	28	2007	24	1842.8	44.1	2659.3	12.48	2007	24	2291.27	22.2914	1385.98	23.1785	1440.5	12.0765	1438.9
									2532	68.66	2553	47			2560	20	2279	30	2686	18	2553	47	2714	48	2301	32	1612	26		0	1408	32	2714	48	2009	26	1841.3	46.24	2839.3	12.06	2009	26	2658.28	21.5484	1420.87	19.4247	1443.49	13.84	1440.69
									1966.7	140.32	2562	88			2562	19	2329	18	2689	23	2562	88	1694	50	2478	16	1624	50		0	1491	62	1694	50	2019	24	1787	44.94	1784.3	14.22	2019	24	2684.34	21.4319	1426	18.5778	1444.9	12.7716	1441.8
									1818.2	49.68	2589	22			2584	40	2395	51	2701	34	2589	22	1672	34	2496	14	2583	28		0	1851	22	1672	34	2024	24	1825.6	46.4	1863.7	15.08	2024	24	2698.45	21.7547	1426.26	18.7857	1446.32	13.4392	1444.82
									1872.6	45.42	2590	18			2595	65	2472	27	2715	31	2590	18	2356	34	2591	24	1849	16		0	1867	42	2356	34	2025	24	1866.7	44.08	1866.8	17.18	2025	24	2699.83	21.8734	1430.35	22.0854	1455.44	12.138	1447.42
									1825.9	53.92	2598	37			2596	24	2483	64	2717	23	2598	37	2071	26	3295	12	1903	22		0	1837	34	2071	26	2074	82	1861.8	44.54	1827.7	19.46	2074	82	2713.62	21.6752	1432.35	18.9464	1456.68	12.6809	1456.04
									2447.5	21.36	2614	13			2600	19	2602	15	2920	20	2614	13	1970	32	2068	24	1710	44		0	1849	22	1970	32	2089	156	1874.2	44.06	1815.5	18.32	2089	156	2739.38	21.3724	1436.24	18.9578	1457.11	13.7619	1457.65
									1840.6	36.52	2639	25			2607	24	2685	72			2639	25	2552	36	2072	34	1785	16		0	1927	28	2552	36	2139	110	2696.2	40.58	1881.9	15.26	2139	110			1439.57	19.7511	1457.59	13.2022	1464.8
									1838.7	17.08	2640	19			2609	13	3170	62			2640	19	1860	22	1508	40	2650	22		0	1344	46	1860	22	2424	24		0	2683.6	13.74	2424	24			1440.78	19.5148	1457.63	11.9583	1465.29
									1821.6	44.74	2650	42			2611	19					2650	42	2650	22	1625	32	1852	48		0	1664	32	2650	22	2488	24		0	1848.7	16.56	2488	24			1442.94	19.5691	1458.23	12.5624	1468.09
									2075.2	45.62	2674	106			2619	39					2674	106	2493	60	1637	22	2907	28		0	1912	36	2493	60	2515	24		0	1813.5	16.62	2515	24			1446.86	20.8662	1460.95	12.2933	1479.17
									1980.6	27.44	2708	12			2625	24					2708	12	2625	54	2584	18	1715	30		0	1941	36	2625	54	2614	24		0	1994.6	15.24	2614	24			1459.37	18.7402	1464.45	12.164	1482.79
									1776.8	61.04	2714	23			2626	36					2714	23	1922	28	1144	50	1846	38		0		0	1922	28	2650	24		0		0	2650	24			1459.54	22.1487	1469.2	12.293	1485.9
									1778.6	42.56	2724	13			2655	62					2724	13	1814	34	1629	34	1631	38		0		0	1814	34	2651	24		0		0	2651	24			1464.76	21.0836	1469.28	19.3253	1486.38
									1763.5	28.6	2921	13			2667	15					2921	13	1843	78	1644	24	2042	28		0		0	1843	78	2719	32		0		0	2719	32			1469.17	19.3333	1478.23	12.0283	1594.86
									1760.3	49.56	2957	13			2669	52					2957	13	2331	28	1675	22	2627	14		0		0	2331	28	2754	24		0		0	2754	24			1532.99	43.2299	1601.73	24.2931	1599.33
									2563.4	20.9	2963	10			2670	85					2963	10	1941	30	1705	34	2176	22		0		0	1941	30	2757	24		0		0	2757	24			1627.55	19.0173	1637.29	12.7987	1614.15
									1905.2	29.94					2684	60					1885	70	1853	90	1734	28	1843	52		0		0	1853	90	2784	22		0		0	2784	22			1629.19	18.3613	1666.08	12.1349	1619.67
									2604.3	22.3					2686	29					1900	52	1810	22	1819	30	1758	16		0		0	1810	22	2791	22		0		0	2791	22			1638.07	18.2248	1704.76	12.7877	1622.96
									2538.6	22.36					2687	25					1914	21	1736	28	1820	34	1642	46		0		0	1736	28	2796	24		0		0	2796	24			1638.17	18.303	1751.87	11.8036	1623.04
									1845	26.2					2707	16					1921	53	1931	86	1827	24	1606	82		0		0	1931	86	2798	24		0		0	2798	24			1674.93	18.949	1837.11	11.5633	1628.36
									1801.9	55.96					2731	39					1927	55		0	1856	22	1847	32		0		0	1467	22	2800	24		0		0	2800	24			1689.57	18.0704	1855.81	11.3953	1632.28
									1782.8	51.28					2821	29					1956	76		0	1861	32	2033	18		0		0	1900	34	2806	22		0		0	2806	22			1741.64	18.1436	1858.56	12.4707	1639.06
									2141.29	15.9											1986	69		0	1871	46	1278	114		0		0	1728	60	2828	22		0		0	2828	22			1830.45	17.8854	1922.43	11.7592	1647.73
									1768.59	18.46											1991	13		0	1882	18	1691	22		0		0	1767	46	2829	24		0		0	2829	24			1837.04	18.3979	2243.15	26.7176	1657.34
									2553.8	9.42											2011	71		0	1889	24	1614	12		0		0	1703	24	2831	22		0		0	2831	22			1877.24	17.3803	2311.47	11.2045	1661.12
									1880.07	12.62											2097	62		0	1931	30	1826	36		0		0	1750	34	2834	24		0		0	2834	24			1901.02	18.1759	2678.25	10.2651	1666.52
									1830.36	30.04											2307	23		0	2509	20	1782	20		0		0	2631	42	2843	36		0		0	2843	36			2151.08	17.0943	2718.76	10.7349	1721.6
									2193.36	12.92											2329	42		0	2527	14	1778	22		0		0	1623	20	2880	40		0		0	2880	40			2498.96	16.3999	2750.79	10.2462	1722.8
									1843.25	57.66											2356	91		0	2542	28	1772	32		0		0	2546	58	2895	22		0		0	2895	22			2692.02	15.9214	2780.35	10.5176	1726.17
									1766.28	28.08											2394	183		0		0	1706	20		0		0	1656	26	2959	24		0		0	2959	24			2720.37	15.9525	2852.97	10.1473	1727.21
									1866.18	34.62											2420	54		0		0	1632	16		0		0	1754	30	2982	24		0		0	2982	24			2725	16.912			1744.27
									2270.34	26.08											2445	32		0		0	1302	46		0		0	1754	24		0		0		0	2695.2	24.12			2827.1	15.957			1785.12
									2367.53	13.62											2447	64		0		0	1455	70		0		0	1607	60		0		0		0	1818.2	21.6							1786.87
									1751.18	26.48											2447	35		0		0	2373	12		0		0	2037	30		0		0		0	2521.3	21.8							1822.04
									2342.8	20.12											2448	41		0		0	1625	20		0		0	1723	24		0		0		0	2681.3	29.82							1833.38
									2677.21	21.68											2456	62		0		0	2420	10		0		0	1971	22		0		0		0	1862.7	31.18							1834.06
									2690.91	12.22											2468	49		0		0	1790	18		0		0	1729	18		0		0		0	1931.2	39.48							1845.88
																					2478	49		0		0	2079	14		0		0	1131	54		0		0		0	1767.7	40.2							1871.11
																					2484	14		0		0	1785	28		0		0	1587	36		0		0		0	2593.8	22.1							1878.08
																					2507	26		0		0	1625	56		0		0	1592	32		0		0		0	1865.2	38							1918.93
																					2510	17		0		0	2286	12		0		0	2521	14		0		0		0	2559.3	25.66							1973.27
																					2512	19		0		0	2926	38		0		0	2576	16		0		0		0	1881.7	33.1							1997.57
																					2515	28		0		0	1849	24		0		0	1886	26		0		0		0	1863.5	30.96							2053.38
																					2518	21		0		0	1899	18		0		0	2678	34		0		0		0	1867.1	35.32							2475.17
																					2521	67		0		0	1738	26		0		0	1601	26		0		0		0	2873.9	20.3							2484.9
																					2534	40		0		0	1889	12		0		0	1681	54		0		0		0	1995.7	28.5							2650.75
																					2552	32		0		0		0		0		0	1808	30		0		0		0	2687.2	23.1							2664.93
																					2572	20											1876	18							1858.2	32.68							2730.72
																					2573	54											2092	32							1860	36.96							2986.74
																					2592	9											2511	14							1840.5	34.86
																					2592	76											2724	20							1797.9	38.2
																					2618	36											1828	26							1850.7	26.36
																					2623	29											1435	22							2655.5	25.82
																					2658	36											1454	46							1785.7	34.48
																					2678	36											1630	24							1933.7	35.38
																					2688	28											1641	38							1863.1	28.92
																					2692	32											1716	26							2674.2	30.16
																					2727	92											1750	22							2744.5	28.74
																					2731	27											1769	34							1810.8	36.44
																					2746	26											1783	24							1890.8	42.48
																					2783	44											1819	26							2913.1	40.46
																					2788	66											1820	32							1863.8	43.14
																					2793	28											1849	36							1842.3	42.62
																					1814	35											1856	32							1822.7	42.02
																					1823	19											1865	24							1829.2	41.96
																					1834	44											1890	24							1823.1	43.02
																					1845	37											1907	28							1851.7	46.04
																					1857	22											1952	24							1853.7	42.44
																					1870	26											2000	22							1810.5	43.96
																					1873	21											2079	44							1838.1	43.18
																					1881	33											2277	98							2700.7	38.44
																					1892	18											2301	32							2742.4	45.42
																					1893	32											2478	16							1841.9	43.04
																					1897	21											2496	14							1825.3	43.9
																					1898	96											2591	24							1894	41.96
																					1919	30											3295	12							1859	42.76
																					1928	57											2068	24							1819.1	44.98
																					1935	110											2072	34							1891.1	43.52
																					1935	20											1508	40							1838.2	44.04
																					1983	29											1625	32							1839.2	47.62
																					2013	24											1637	22							1810.9	62.1
																					2023	26											2584	18							1842.8	44.1
																					2028	21											1144	50							1841.3	46.24
																					2034	75											1629	34							1787	44.94
																					2062	81											1644	24							1825.6	46.4
																					2071	28											1675	22							1866.7	44.08
																					2075	48											1705	34							1861.8	44.54
																					2274	82											1734	28							1874.2	44.06
																					2305	20											1819	30							2696.2	40.58
																					2312	33											1820	34							2669.5	54.72
																					2313	17											1827	24							1709.6	90.96
																					2337	38											1856	22							1815.6	63.5
																					2345	25											1861	32							2435	47.36
																					2349	46											1871	46							2449.6	52.84
																					2349	47											1882	18							1880.4	137.06
																					2349	191											1889	24							2772.8	53.42
																					2352	115											1931	30							1772.6	90.18
																					2415	14											2509	20							1845.6	73.5
																					2419	40											2527	14							1811.5	80.88
																					2471	25											2542	28							1739.9	63.96
																					2473	12											3002	12							1790.2	58.34
																					2490	18											1856	38							1867.6	47.7
																					2500	16											1861	30							1777.4	53.38
																					2501	117											1875	24							1780.5	62.88
																					2504	48											1900	26							1749	81.44
																					2508	91											2585	18							1769.3	52.52
																					2509	21											1846	18							1898	52.04
																					2516	34											2496	22							1782.6	60.98
																					2519	16											1595	30							1792.6	54.36
																					2525	27											1368	60							1767.6	65.44
																					2527	19											1608	50							1784.7	57.9
																					2544	77											1504	30							1812.5	68.16
																					2558	33											1836	24							2669.5	54.72
																					2559	82											1784	36							1709.6	90.96
																					2560	20											2525	16							1815.6	63.5
																					2562	19											1581	22							2435	47.36
																					2584	40											1767	20							2449.6	52.84
																					2595	65											1874	18							1880.4	137.06
																					2596	24											1793	28							2772.8	53.42
																					2600	19											2658	16							1772.6	90.18
																					2607	24											2462	14							1845.6	73.5
																					2609	13											1875	24							1811.5	80.88
																					2611	19											1502	26							1739.9	63.96
																					2619	39											1670	30							1790.2	58.34
																					2625	24											1605	32							1867.6	47.7
																					2626	36											1614	40							1777.4	53.38
																					2655	62											1641	24							1780.5	62.88
																					2667	15											1878	34							1749	81.44
																					2669	52											1775	42							1769.3	52.52
																					2670	85											2594	18							1898	52.04
																					2684	60											1880	30							1782.6	60.98
																					2686	29											1762	22							1792.6	54.36
																					2687	25											1841	36							1767.6	65.44
																					2707	16											1652	68							1784.7	57.9
																					2731	39											2699	20							1812.5	68.16
																					2821	29											1926	12							1868.8	14.1
																					1602	92											1295	72							1960	13.94
																					1609	35											2001	18							1817.5	15.94
																					1620	40											1698	22							1851.6	18.4
																					1633	81											1873	22							2659.3	12.48
																					1634	64											2363	22							2839.3	12.06
																					1640	38											1977	18							1784.3	14.22
																					1647	55											1877	48							1863.7	15.08
																					1648	41											2402	14							1866.8	17.18
																					1659	125											1905	26							1827.7	19.46
																					1671	40											1586	30							1815.5	18.32
																					1724	24											1780	42							1881.9	15.26
																					1739	22											1974	32							2683.6	13.74
																					1745	39											1873	26							1848.7	16.56
																					1755	24											1905	18							1813.5	16.62
																					1756	33											1810	48							1994.6	15.24
																					1776	38											1612	26
																					1780	18											1624	50
																					1789	34											2583	28
																					1790	19											1849	16
																					1791	53											1903	22
																					1792	14											1710	44
																					1803	30											1785	16
																					1807	23											2650	22
																					1809	20											1852	48
																					1812	24											2907	28
																					1817	42											1715	30
																					1819	27											1846	38
																					1825	32											1631	38
																					1826	61											2042	28
																					1831	42											2627	14
																					1833	33											2176	22
																					1834	46											1843	52
																					1844	29											1758	16
																					1848	13											1642	46
																					1850	66											1606	82
																					1850	21											1847	32
																					1854	26											2033	18
																					1858	28											1278	114
																					1868	54											1691	22
																					1870	24											1614	12
																					1873	50											1826	36
																					1881	18											1782	20
																					1884	40											1778	22
																					1908	38											1772	32
																					1909	22											1706	20
																					1914	17											1632	16
																					1924	50											1302	46
																					2003	62											1455	70
																					2032	40											2373	12
																					2052	34											1625	20
																					2125	17											2420	10
																					2279	30											1790	18
																					2329	18											2079	14
																					2395	51											1785	28
																					2472	27											1625	56
																					2483	64											2286	12
																					2602	15											2926	38
																					2685	72											1849	24
																					3170	62											1899	18
																					1622	60											1738	26
																					1663	42											1889	12
																					1707	123											1613	54
																					1715	29											1889	14
																					1762	19											1780	16
																					1782	57											2581	14
																					1808	24											1670	32
																					1814	28											1849	98
																					1821	28											2540	10
																					1824	121											1779	20
																					1828	22											2688	14
																					1830	51											1857	28
																					1832	33											1935	20
																					1836	34											2539	10
																					1837	36											2693	18
																					1845	66											2763	30
																					1847	33											1924	24
																					1848	27											1848	20
																					1855	44											1784	28
																					1860	37											1785	38
																					1870	81											1813	12
																					1872	40											1786	14
																					1879	23											1797	40
																					1902	47											2360	40
																					1908	20											2530	18
																					1908	24											2742	12
																					1922	25											2641	20
																					1981	23											1722	22
																					2029	20											2680	10
																					2053	101											2401	26
																					2061	30											1737	22
																					2063	50											1424	52
																					2090	16											1734	24
																					2107	30											1702	26
																					2126	17											1863	18
																					2259	19											1870	20
																					2281	139											1932	24
																					2371	22											2388	30
																					2372	31											2448	22
																					2395	95											2347	20
																					2409	22											2518	14
																					2415	45											2561	20
																					2445	19											1840	52
																					2468	43											1830	44
																					2578	103											1814	40
																					2578	33											1838	26
																					2584	24											1829	20
																					2647	63											1838	30
																					2661	27											1887	42
																					2667	16											1395	28
																					2677	20											2902	18
																					2686	18											1395	56
																					2689	23											1874	30
																					2701	34											1672	52
																					2715	31											1952	32
																					2717	23											1514	30
																					2920	20											2332	16
																																	1913	52
																																	1558	36
																																	1705	66
																																	1794	32
																																	2193	16
																																	1854	30
																																	1367	38
																																	1404	36
																																	1379	26
																																	1400	30
																																	1901	24
																																	1369	28
																																	1619	22
																																	1879	34
																																	1612	32
																																	1498	32
																																	1651	38
																																	2556	14
																																	1822	26
																																	2345	28
																																	1342	54
																																	1993	20
																																	1376	46
																																	1846	88
																																	1921	34
																																	2073	22
																																	2500	20
																																	1422	44
																																	2732	28
																																	1530	44
																																	1998	68
																																	2705	16
																																	1819	30
																																	1887	32
																																	1512	38
																																	2615	14
																																	1408	32
																																	1491	62
																																	1851	22
																																	1867	42
																																	1837	34
																																	1849	22
																																	1927	28
																																	1344	46
																																	1664	32
																																	1912	36
																																	1941	36
[truncated: 81 more columns]

## Sheet: DR1E_NewSm-NdData
Sample ID1,2,3	Pluton / Group (Gp) / Formation (Fm)	Lithology	UTM Zone	NAD83 Easting	NAD83 Northing	Age (Ma)	143Nd/ 144Nd0	2-sigma	Sm (ppm)	Nd (ppm)	147Sm/ 144Ndcalc	143Nd/ 144Ndinitial4	εNd(initial)5	143Nd/ 144Nd1006	εNd(100)5,6	TDM (Ga)7
Tungsten Plutonic Suite
KR05-110	Cac	granite	9	523320	6915388	97.4	0.511756	6e-06	7.73197	46.2064	0.101119	0.511692	-16.0226	0.51169	-15.9906	1.88168
KR05-143	Circular Stock	granite	10	225037	6881369	96.86	0.511837	6e-06	5.387	29.8697	0.108986	0.511768	-14.5452	0.511766	-14.5106	1.90534
KR05-148	Rifle Range	granite	9	543670	6874850	96.3	0.511822	7e-06	6.50324	39.5362	0.0994	0.511759	-14.7267	0.511757	-14.6809	1.7663
KR05-175	Lened	granite	9	518278	6916602	97.57	0.511762	5e-06	7.91752	48.3782	0.0988973	0.511699	-15.8754	0.511697	-15.8452	1.83758
KR05-207	West Tuna	granite	9	536842	6856476	97	0.511845	7e-06	5.40796	28.6111	0.114223	0.511773	-14.4528	0.51177	-14.4213	1.99285
KR05-208	Little Hyland	granite	9	534837	6860604	96.8	0.511861	7e-06	4.25566	20.3729	0.126232	0.511781	-14.2911	0.511778	-14.2625	2.2369
KR05-210	Nahanni Range Road	granite	9	531135	6865040	97.19	0.511868	7e-06	4.36476	20.8994	0.126207	0.511788	-14.1514	0.511785	-14.1255	2.22419
KR05-215	Mine Stock	granite	9	540435	6870650	101.15	0.511788	6e-06	5.12761	27.7921	0.111492	0.511714	-15.4862	0.511715	-15.4987	2.02411
Ediacaran to lower Cambrian (Terreneuvian) Sedimentary Rocks
RC95-21C	Hyland Gp	grit	9	380781	6941317	550	0.511353	1.3e-05	2.48231	13.8206	0.108526	0.510962	-18.9015	0.511282	-23.9484	2.59045
RC95-21D	Hyland Gp	shale	9	380781	6941317	550	0.511377	8e-06	6.21146	40.003	0.0938224	0.511039	-17.3978	0.511316	-23.2925	2.24492
RC95-21D-DUP	Hyland Gp	shale	9	380781	6941317	550	0.511383	1e-05	6.27217	40.1236	0.0944549	0.511043	-17.3251	0.511321	-23.1835	2.24916
Mid- to late Cambrian (Stage 2 to Furungian) to Devonian (excluding the Devono-Mississippian 'clastic influx') Sedimentary Rocks
RC95-32	Rabbittkettle Fm	siliceous shale	9	380781	6941317	520	0.511716	1.2e-05	25.121	109.616	0.138486	0.511244	-14.1421	0.511625	-17.2481	2.88778
EM06-138A	Hess River Fm	shale	9	478956	7066280	505	0.511778	N.D.*	2.36606	12.1972	0.117223	0.51139	-11.6649	0.511701	-15.7634	2.15887
EM06-138B	Rabbitkettle Fm	shale	9	479039	7066377	505	0.511803	N.D.*	4.13731	19.6507	0.12723	0.511382	-11.8272	0.51172	-15.4074	2.36359
EM06-138D	Rabbitkettle Fm	shale	9	479026	7066233	505	0.511976	N.D.*	3.07012	14.2147	0.130523	0.511545	-8.65398	0.511891	-12.0669	2.14248
EM06-138F	Rabbitkettle Fm	shale	9	478981	7066183	505	0.511832	N.D.*	2.52212	13.4581	0.113249	0.511457	-10.3605	0.511758	-14.6661	1.99347
RC95-19	Rabbittkettle Fm	dark siliceous shale	9	374301	6923229	490	0.511795	1.3e-05	4.56398	23.7157	0.116294	0.511422	-11.4303	0.511719	-15.4234	2.11238
EM06-137A	Hess River Fm	shale	9	486463	7051258	490	0.51235	N.D.*	3.55128	16.5518	0.129672	0.511934	-1.43442	0.512265	-4.77027	1.44934
EM06-137B	Hess River Fm	shale	9	486300	7051170	490	0.512335	N.D.*	3.3483	16.3912	0.123458	0.511939	-1.33219	0.512254	-4.97798	1.37468
EM06-137D	Hess River Fm	shale	9	486245	7051123	490	0.512139	N.D.*	0.768699	5.14029	0.0903759	0.511849	-3.08489	0.51208	-8.37853	1.24827
Ordovician Sedimentary Rocks
EM06-139A	Duo Lake Fm	shale	9	481087	7059210	465	0.512028	N.D.*	2.31469	11.818	0.118365	0.511648	-7.00512	0.511951	-10.8993	1.78869
EM06-139D	Duo Lake Fm	shale	9	481273	7059267	465	0.511337	N.D.*	2.88734	17.8171	0.097918	0.511023	-19.2253	0.511273	-24.127	2.37587
RC95-30	Road River Gp	siliceous cherty shale	9	452509	7015501	460	0.511913	1e-05	3.95829	20.3784	0.117381	0.511559	-9.49755	0.511836	-13.1349	1.95121
RC95-25	Road River Gp	sandy shale	9	395918	6961345	450	0.512025	9e-06	5.04671	25.3049	0.120524	0.51167	-7.59248	0.511946	-10.9897	1.83512
Devono-Mississippian (excluding the Devono-Mississippian 'clastic influx') Sedimentary Rocks
RC95-33	Road River Gp	buff siltstone	9	426070	6983489	400	0.511937	1.6e-05	4.99078	23.6817	0.127356	0.511603	-10.1464	0.511854	-12.7939	2.13313
RC95-31	Road River Gp	shale	9	454254	7016133	365	0.511788	9e-06	6.12599	33.4291	0.110739	0.511523	-12.5895	0.511716	-15.4891	2.00941
Note: Italicized values for UTM locations and Age are approximated, and UTM locations, Group/Formation, and Ages for "RC" samples are from Yukon Geological Survey, 2022, Yukon isotope data. Yukon Geological Survey, https://data.geology.gov.yk.ca/Compilation/37 [accessed Nov 28, 2022].
*N.D. = no data.
1 "KR05" analytical procedures followed Weis, D., et al, 2006, High-precision isotopic characterization of USGS reference materials by TIMS and MC-ICP-MS: Geochemistry, Geophysics, Geosystems, v. 7, Q08006, doi:10.1029/2006GC001283.
2 "RC" samples: analytical procedures followed Creaser, R.A., Erdmer, P., Stevens, R.A., and Grant, S.L., 1997, Tectonic affinity of Nisutlin and Anvil assemblage strata from the Teslin tectonic zone, northern Canadian Cordillera: Constraints from neodymium isotope and geochemical evidence: Tectonics, v. 16, p. 107-121, doi: 10.1029/96TC03317.
3 "EM06" analytical procedures followed Cousens, B.L., 1996, Magmatic evolution of Quaternary mafic magmas at Long Valley Caldera and the Devils Postpile, California: Effects of crustal contamination on lithospheric mantle-derived magmas: Journal of Geophysical Research, v. 101, p. 27673–27689, doi:10.1029/96JB02093.
4 143Nd/144Ndinitial was calculated using a 147Sm decay constant of 6.54x10-12/yr.
5 εNd values were calculated using 147Sm/144Ndchondrite = 0.512638 and 147Sm/144Ndchondrite = 0.1967: Patchett, P.J., Vervoort, J.D., Söderlund, U., Salters, V.J.M., 2004, Lu–Hf and Sm–Nd isotopic systematics in chondrites and their constraints on the Lu–Hf properties of the Earth: Earth and Planetary Science Letters, vol. 222, p. 29–41, doi: 10.1016/j.epsl.2004.02.030.
6 Calculated for value at 100 Ma.
7 TDM (depleted mantle model ages) were calculated using 147Sm/144NdDM = 0.51315 and 147Sm/144NdDM = 0.2137: Michard, A., Gurriet, P., Soudant, M., and Albarede, F., 1985, Nd isotopes in French Phanerozoic shales: external vs. internal aspects of crustal evolution: Geochimica et Cosmochimica Acta, v. 49, p. 601–610, doi:10.1016/0016-7037(85)90051-1.

## Sheet: DR1F_Sm-NdCompilation
Sample ID	Pluton / Group (Gp) / Formation (Fm)	Lithology	Age (Ma)	147Sm/ 144Ndcalc	εNd(100)9,10	TDM (Ga)11
Tungsten Plutonic Suite
S12-39 9133	Cantung	granite	98	0.130841	-14.7011	2.4
S13-06 666.5-6683	Cantung	granite	98	0.117205	-14.295	2.04
18-CA-113	Cantung (aplite dyke)	aplite	98	0.112841	-14.8212	2
18-MA-133	Mactung	granite	97	0.134321	-19.3989	2.95
18-MA-033	Mactung	granite	97	0.123813	-19.4566	2.63
MS161 322-322.3 A3	Mactung	granite	97	0.106048	-18.0011	2.11
SH-99-0162	West Tuna	granite	97.1	0.10931	-14.8535	1.93643
98-Z-C-0282	Rudi	granite	98	0.135148	-16.4976	2.7
YK97-CLEA21	Clea	granite	97	0.1128	-13.2312	1.87514
YK97-MT-MG1	Mactung	granite	97	0.1066	-14.9667	1.89841
Muskwa assemblage4
RAR-93-AH1	nd	shale/mudrock	1766 (max)	0.0898629	-26.6747	2.38775
RAR-93-AH5	nd	shale/mudrock	1766 (max)	0.102339	-23.6926	2.43553
RAR-93-AH6	nd	shale/mudrock	1766 (max)	0.0871396	-27.7522	2.40456
RAR-93-AHZa	nd	shale/mudrock	1766 (max)	0.093766	-24.2271	2.30416
RAR-93-CC5	nd	shale/mudrock	1766 (max)	0.0932914	-26.621	2.44894
Wernecke SG5
FF-07-1-2-1	Fairchild Lake Fm	mudrock	1649 (max)	0.100044	-24.4107	2.43737
FF-07-8-4-1	Fairchild Lake Fm	mudrock	1649 (max)	0.109024	-24.5527	2.64668
FF-07-7-5-1	Fairchild Lake Fm	mudrock	1649 (max)	0.108372	-19.9526	2.29426
DT-07-11-3-1	Fairchild Lake Fm	mudrock	1649 (max)	0.111092	-20.5819	2.39933
DT-07-11-2-1	Fairchild Lake Fm	mudrock	1649 (max)	0.107754	-21.9833	2.42946
FF-07-9-1-1	Fairchild Lake Fm	mudrock	1649 (max)	0.0845073	-22.8093	2.06236
DT-92-126-1	Fairchild Lake Fm	mudrock	1649 (max)	0.120282	-21.0742	2.66425
DT-92-129-1	Fairchild Lake Fm	mudrock	1649 (max)	0.123438	-17.5438	2.45181
DT-92-132-7	Fairchild Lake Fm	mudrock	1649 (max)	0.10465	-24.0161	2.50742
DT-07-11-1-1	Quartet Fm	mudrock	1649 (max)	0.125216	-20.7643	2.77903
FF-07-10-4-1	Quartet Fm	mudrock	1649 (max)	0.119892	-18.1227	2.41117
FF-07-10-3-1	Quartet Fm	mudrock	1649 (max)	0.103313	-22.0773	2.34299
FF-07- 2-7-1	Quartet Fm	mudrock	1649 (max)	0.108661	-23.0306	2.52631
FF-07-10-5-1	Quartet Fm	mudrock	1649 (max)	0.112793	-22.0453	2.5496
DT-92-55-1B	Quartet Fm	mudrock	1649 (max)	0.10653	-22.4011	2.43313
DT-92-27-2	Quartet Fm	mudrock	1649 (max)	0.110653	-23.6049	2.61577
FF-07-3-2-1	Gillespie Lake Fm	mudrock	1649 (max)	0.108747	-21.0979	2.38626
FF-07-10-6-1	Gillespie Lake Fm	mudrock	1649 (max)	0.114497	-20.9266	2.50442
FF-07-3-3-1	Gillespie Lake Fm	mudrock	1649 (max)	0.109677	-21.7765	2.45686
FF-07-12-1-1	Gillespie Lake Fm	mudrock	1649 (max)	0.103849	-23.9939	2.48846
FF-07-12-5-1	Gillespie Lake Fm	mudrock	1649 (max)	0.110957	-22.4544	2.53686
FF-07-13-2-2	Gillespie Lake Fm	mudrock	1649 (max)	0.0936866	-24.9569	2.34957
FF-07-13-7-1	Gillespie Lake Fm	mudrock	1649 (max)	0.127937	-15.4746	2.38817
DT-92-80-1B	Gillespie Lake Fm	mudrock	1649 (max)	0.0919478	-24.1466	2.2663
DT-93-129-1B	Gillespie Lake Fm	mudrock	1649 (max)	0.104864	-23.1408	2.45011
Pinguicula Gp6
KM09-2-4-1	Mt Landreville Fm	mudrock	1322 (max)	0.114645	-14.4267	2.00129
KM09-2-5-1	Mt Landreville Fm	mudrock	1322 (max)	0.114638	-14.8949	2.03771
KM09-2-8-1	Mt Landreville Fm	mudrock	1322 (max)	0.1166	-14.7053	2.06152
KM09-3-1-1	Mt Landreville Fm	mudrock	1322 (max)	0.112772	-12.4321	1.81326
KM09-10-4-1	Mt Landreville Fm	mudrock	1322 (max)	0.092121	-18.1782	1.88986
KM13-1-4	Mt Landreville Fm	mudrock	1322 (max)	0.118013	-11.8161	1.85671
KM13-1-5	Mt Landreville Fm	mudrock	1322 (max)	0.124559	-11.3924	1.94814
KM13-1-6	Mt Landreville Fm	mudrock	1322 (max)	0.120326	-11.7871	1.89757
Ediacaran to lower Cambrian (Terreneuvian) Sedimentary Rocks
95CG287	Hyland Gp	siltstone	580	0.0941	-26.1837	2.43828
95CG297	Hyland Gp	sandstone	580	0.1205	-24.8218	2.97914
95CG267	Hyland Gp	shale	575	0.1069	-23.3798	2.51142
95CG277	Hyland Gp	sandstone	575	0.1094	-22.7339	2.53019
95CG257	Hyland Gp	shale	570	0.1017	-21.3215	2.25589
95CG25-DUPLICATE7	Hyland Gp	shale	570	0.1017	-20.7947	2.21962
95JN13A-97	Gog Gp	shale	555	0.0909	-21.2435	2.06454
89AT1747	Atan Fm	shale	555	0.1	-24.0538	2.41373
89GJ357	Atan Fm	shale	555	0.1057	-21.5117	2.35279
89GJ407	Atan Fm	sandstone	555	0.1288	-16.9941	2.56639
MS177 86.2-86.33	Vampire Fm ("Mactung Unit 1 Argillite")	argillite	540	0.109262	-18.2128	2.18
18-MA-103	Vampire Fm ("Mactung Unit 1 Argillite")	argillite	540	0.0997339	-24.4812	2.44
U2602-1403	undivided Narchilla-Vampire Fm ("Cantung Upper Argillite")	argillite	540	0.11046	-20.3281	2.37
18-CA-103	undivided Narchilla-Vampire Fm ("Cantung Upper Argillite")	argillite	540	0.106503	-19.0817	2.19
18-CA-053	Sekwi Fm ("Cantung Swiss Cheese Limestone")	limestone	540	0.122163	-18.0185	2.45929
Mid- to late Cambrian (Stage 2 to Furungian) Sedimentary Rocks
CJA-82-108/37	Slats Creek Fm	sandstone	505	0.1338	-13.4393	2.35531
CJA-82-108/47	Slats Creek Fm	shale	505	0.1004	-19.1219	2.08474
89GJ347	Kechika Fm	shale	505	0.095	-26.3137	2.46668
95JN11-57	Kechika Fm	shale	505	0.1052	-25.5635	2.62992
PE00-608	Boya Fm	micaceous quartzite	500	0.12	-24.8921	2.96667
PE00-628	Boya Fm	quartz-muscovite schist	500	0.1117	-20.473	2.40031
95CG177	Road River Gp	shale	500	0.1207	-8.93847	1.66315
95CG347	Kechika Fm	shale	495	0.1007	-20.7228	2.19522
95CG357	Kechika Fm	siltstone	490	0.1064	-19.3546	2.21171
95CG187	Road River Gp	shale	490	0.1171	-11.311	1.79385
Ordovician Sedimentary Rocks
95CG197	Road River Gp	shale	478	0.1211	-14.3292	2.11973
PE00-638	Road River Gp	grey pyritic phyllite	450	0.1123	-8.83411	1.52978
PE00-648	Road River Gp	grey phyllitic slate	450	0.1337	-9.51507	1.97204
Silurian to Mississippian (excluding the Devono-Mississippian 'clastic influx') Sedimentary Rocks
95CG167	Road River Gp	shale	440	0.1094	-12.2873	1.74385
95CG157	Road River Gp	shale	417	0.1046	-13.147	1.73758
95CG67	Road River Gp	shale	410	0.1317	-9.48758	1.9208
Note: Italicized values for Age (Ma) are approximated.
1 Lang, J.R., 2001, Tombstone–Tungsten magmatic belt, in Lang, J.R. (ed.), Regional and system-scale controls on the formation of copper and (or) gold magmatic–hydrothermal mineralization: Mineral Deposit Research Unit, Special Publication 2, p. 7–49.
2 Heffernan, R.S., 2004. Temporal, geochemical, isotopic and metallogenic studies of “mid”-Cretaceous magmatism in the Tintina Gold Province, southeastern Yukon and southwestern Northwest Territories, Canada [PhD Thesis]: Vancouver, University of British Columbia, 83 p.
3 Elongo, V. et al., 2021, Ancient roots of tungsten in western North America: Geology, v. 50, p. 791-795, doi:10.1130/G49801.1.
4 Ross, G.M., Villeneuve, M.E., and Theriault, R.J., 2001, Isotopic provenance of the lower Muskwa assemblage (Mesoproterozoic, Rocky Mountains, British Columbia): New clues to correlation and source areas: Precambrian Research, v. 111, p. 57-77, doi: 10.1016/S0301-9268(01)00156-5.
5 Furlanetto, F., Thorkelson, D.J., Rainbird, R.H., Davis, W.J., Gibson, H.D., and Marshall, D.D., 2016, The Paleoproterozoic Wernecke Supergroup of Yukon, Canada: Relationships to orogeny in northwestern Laurentia and basins in North America, East Australia, and China: Gondwana Research, v. 59, p. 14-40, doi:10.1016/j.gr.2016.06.007.
6 Medig, K.P.R., Thorkelson, D.J., Turner, E.C., Rainbird, R.H., Gibson, H.D., and Marshall, D.D., 2022 (in press), Mesoproterozoic Basins (Yukon, Canada) in the Evolution of Supercontinent Columbia: Canadian Journal of Earth Sciences, v. 00, p. 1-62, doi:10.1139/cjes-2022-0055.
7 Garzione, C.N., Patchett, P.J., Ross, G.M., and Nelson, J.L., 1997, Provenance of Paleozoic sedimentary rocks in the Canadian Cordilleran miogeocline: A Nd isotopic study: Canadian Journal of Earth Sciences, v. 34, p. 1603–1618, doi:10.1139/e17-129.
8 Erdmer, P., Mihalynuk, M.G., Gabrielse, H., Heaman, L.M., and Creaser, R.A., 2005, Mississippian volcanic assemblage conformably overlying Cordilleran miogeoclinal strata, Turnagain River area, northern British Columbia, is not part of an accreted terrane: Canadian Journal of Earth Sciences, v. 42, p. 1449-1465, doi:10.1139/E05-045.
9 εNd values were calculated using 147Sm/144Ndchondrite = 0.512638 and 147Sm/144Ndchondrite = 0.1967: Patchett, P.J., Vervoort, J.D., Söderlund, U., Salters, V.J.M., 2004, Lu–Hf and Sm–Nd isotopic systematics in chondrites and their constraints on the Lu–Hf properties of the Earth: Earth and Planetary Science Letters, vol. 222, p. 29–41, doi: 10.1016/j.epsl.2004.02.030.
10 Calculated for value at 100 Ma.
11 TDM (depleted mantle model ages) were calculated using 147Sm/144NdDM = 0.51315 and 147Sm/144NdDM = 0.2137: Michard, A., Gurriet, P., Soudant, M., and Albarede, F., 1985, Nd isotopes in French Phanerozoic shales: external vs. internal aspects of crustal evolution: Geochimica et Cosmochimica Acta, v. 49, p. 601–610, doi:10.1016/0016-7037(85)90051-1.

## Sheet: G51042
Rasmussen, K.L., et al., 2023, The source of tungsten-associated magmas in the northern Canadian Cordillera and implications for the basement: Geology, https://doi.org/10.1130/G51042.1
